# Supplementary material for: Anticancer and Anti-Neuroinflammatory Constituents Isolated from the Roots of Wasabia japonica
Source: MDPI journal article supplement (doi:10.3390/antiox11030482), 2022-02-28

# Anticancer and Anti-neuroinflammatory Constituents Isolated from the Roots of *Wasabia japonica*

Jong Eel Park <sup>1,2</sup>, Tae Hyun Lee <sup>1,3</sup>, Song Lim Ham <sup>3</sup>, Lalita Subedi <sup>4</sup>, Seong Min Hong <sup>4</sup>, Sun Yeou Kim <sup>4,5</sup>,  
Sang Un Choi <sup>6</sup>, Chung Sub Kim <sup>1,3,\*</sup> and Kang Ro Lee <sup>1,\*</sup>

<sup>1</sup>School of Pharmacy, Sungkyunkwan University, Suwon 16419, Republic of Korea

<sup>2</sup>Korea Environment Corporation, 42 Hwangyeong-ro, Seo-gu, Incheon 22689, Republic of Korea

<sup>3</sup>Department of Biopharmaceutical Convergence, Sungkyunkwan University, Suwon, 16419, Republic of Korea

<sup>4</sup>Gachon Institute of Pharmaceutical Science, Gachon University, Incheon 21936, Republic of Korea

<sup>5</sup>College of Pharmacy, Gachon University, #191, Hambakmoero, Yeonsu-gu, Incheon 21936, Republic of Korea

<sup>6</sup>Korea Research Institute of Chemical Technology, Daejeon 34114, Republic of Korea

## Contents

|                                                                                                                 |    |
|-----------------------------------------------------------------------------------------------------------------|----|
| <b>Figure S1.</b> HRESIMS spectrum of <b>1</b> .....                                                            | 1  |
| <b>Figure S2.</b> $^1\text{H}$ NMR spectrum of <b>1</b> in chloroform- <i>d</i> (700 MHz) .....                 | 2  |
| <b>Figure S3.</b> $^{13}\text{C}$ NMR spectrum of <b>1</b> in chloroform- <i>d</i> (175 MHz) .....              | 3  |
| <b>Figure S4.</b> COSY spectrum of <b>1</b> in chloroform- <i>d</i> .....                                       | 4  |
| <b>Figure S5.</b> HSQC spectrum of <b>1</b> in chloroform- <i>d</i> .....                                       | 5  |
| <b>Figure S6.</b> HMBC spectrum of <b>1</b> in chloroform- <i>d</i> .....                                       | 6  |
| <b>Figure S7.</b> $^1\text{H}$ NMR spectrum of <b>2</b> in chloroform- <i>d</i> (700 MHz) .....                 | 7  |
| <b>Figure S8.</b> $^{13}\text{C}$ NMR spectrum of <b>2</b> in chloroform- <i>d</i> (175 MHz) .....              | 8  |
| <b>Figure S9.</b> $^1\text{H}$ NMR spectrum of <b>3</b> in chloroform- <i>d</i> (700 MHz) .....                 | 9  |
| <b>Figure S10.</b> $^1\text{H}$ NMR spectrum of <b>4</b> in methanol- <i>d</i> <sub>4</sub> (700 MHz) .....     | 10 |
| <b>Figure S11.</b> $^1\text{H}$ NMR spectrum of <b>5</b> in chloroform- <i>d</i> (700 MHz).....                 | 11 |
| <b>Figure S12.</b> $^{13}\text{C}$ NMR spectrum of <b>5</b> in chloroform- <i>d</i> (175 MHz) .....             | 12 |
| <b>Figure S13.</b> $^1\text{H}$ NMR spectrum of <b>6</b> in methanol- <i>d</i> <sub>4</sub> (700 MHz) .....     | 13 |
| <b>Figure S14.</b> $^{13}\text{C}$ NMR spectrum of <b>6</b> in methanol- <i>d</i> <sub>4</sub> (175 MHz) .....  | 14 |
| <b>Figure S14.</b> $^1\text{H}$ NMR spectrum of <b>7</b> in methanol- <i>d</i> <sub>4</sub> (700 MHz) .....     | 15 |
| <b>Figure S15.</b> $^{13}\text{C}$ NMR spectrum of <b>7</b> in methanol- <i>d</i> <sub>4</sub> (175 MHz) .....  | 16 |
| <b>Figure S16.</b> $^1\text{H}$ NMR spectrum of <b>8</b> in chloroform- <i>d</i> (700 MHz) .....                | 17 |
| <b>Figure S17.</b> $^1\text{H}$ NMR spectrum of <b>9</b> in chloroform- <i>d</i> (700 MHz) .....                | 18 |
| <b>Figure S18.</b> $^1\text{H}$ NMR spectrum of <b>10</b> in chloroform- <i>d</i> (700 MHz) .....               | 19 |
| <b>Figure S19.</b> $^{13}\text{C}$ NMR spectrum of <b>10</b> in chloroform- <i>d</i> (175 MHz) .....            | 20 |
| <b>Figure S20.</b> $^1\text{H}$ NMR spectrum of <b>11</b> in chloroform- <i>d</i> (700 MHz).....                | 21 |
| <b>Figure S21.</b> $^{13}\text{C}$ NMR spectrum of <b>11</b> in chloroform- <i>d</i> (175 MHz).....             | 22 |
| <b>Figure S22.</b> $^1\text{H}$ NMR spectrum of <b>12</b> in chloroform- <i>d</i> (700 MHz) .....               | 23 |
| <b>Figure S23.</b> $^{13}\text{C}$ NMR spectrum of <b>12</b> in chloroform- <i>d</i> (175 MHz) .....            | 24 |
| <b>Figure S24.</b> $^1\text{H}$ NMR spectrum of <b>13</b> in chloroform- <i>d</i> (700 MHz) .....               | 25 |
| <b>Figure S25.</b> $^1\text{H}$ NMR spectrum of <b>14</b> in methanol- <i>d</i> <sub>4</sub> (700 MHz) .....    | 26 |
| <b>Figure S26.</b> $^{13}\text{C}$ NMR spectrum of <b>14</b> in methanol- <i>d</i> <sub>4</sub> (175 MHz) ..... | 27 |
| <b>Figure S27.</b> $^1\text{H}$ NMR spectrum of <b>15</b> in chloroform- <i>d</i> (700 MHz) .....               | 28 |
| <b>Figure S28.</b> $^{13}\text{C}$ NMR spectrum of <b>15</b> in chloroform- <i>d</i> (175 MHz) .....            | 29 |
| <b>Figure S29.</b> $^1\text{H}$ NMR spectrum of <b>16</b> in chloroform- <i>d</i> (700 MHz) .....               | 30 |
| <b>Figure S30.</b> $^{13}\text{C}$ NMR spectrum of <b>16</b> in chloroform- <i>d</i> (175 MHz) .....            | 31 |
| <b>Figure S31.</b> $^1\text{H}$ NMR spectrum of <b>17</b> in chloroform- <i>d</i> (700 MHz) .....               | 32 |
| <b>Figure S32.</b> $^{13}\text{C}$ NMR spectrum of <b>17</b> in chloroform- <i>d</i> (175 MHz) .....            | 33 |
| <b>Figure S33.</b> $^1\text{H}$ NMR spectrum of <b>18</b> in chloroform- <i>d</i> (700 MHz) .....               | 34 |
| <b>Figure S34.</b> $^{13}\text{C}$ NMR spectrum of <b>18</b> in chloroform- <i>d</i> (175 MHz) .....            | 35 |

**Figure S1.** HRESIMS spectrum of **1**

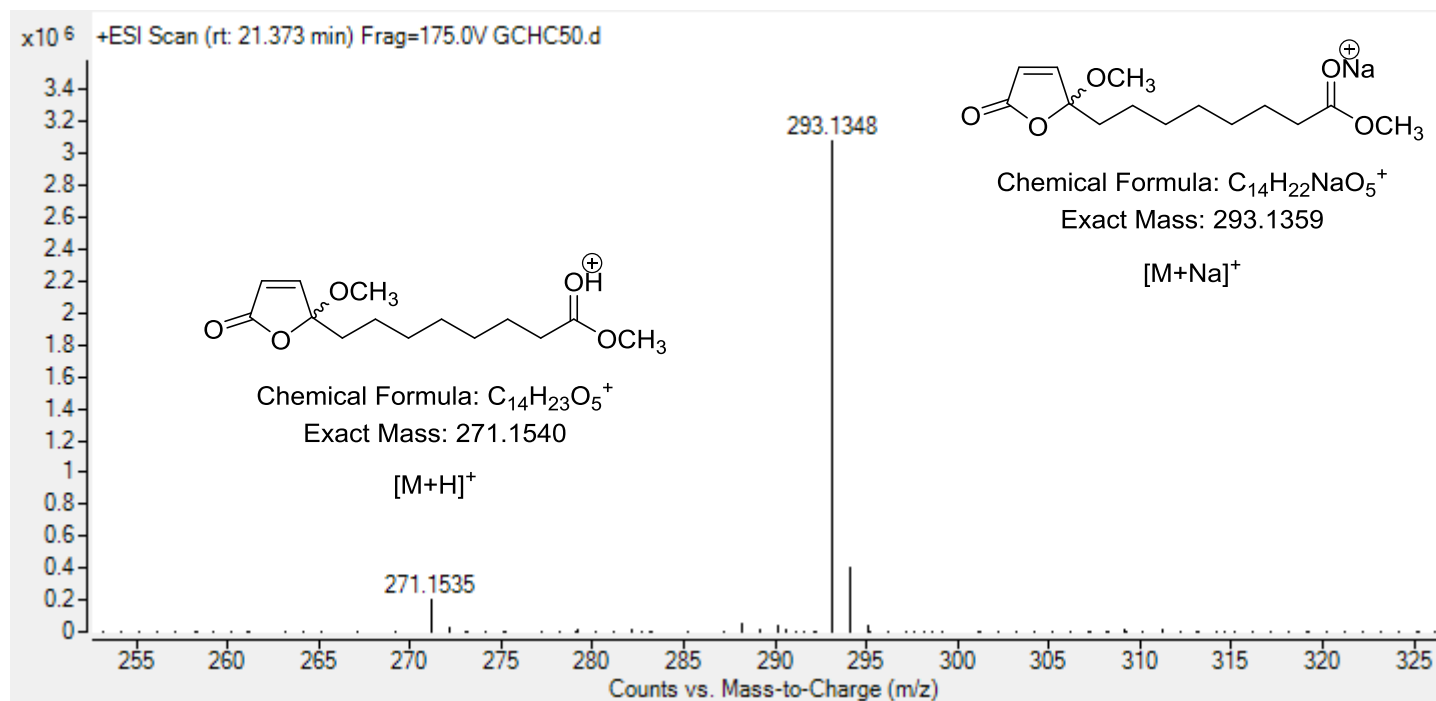

**Figure S2.**  $^1\text{H}$  NMR spectrum of **1** in chloroform- $d$  (700 MHz)

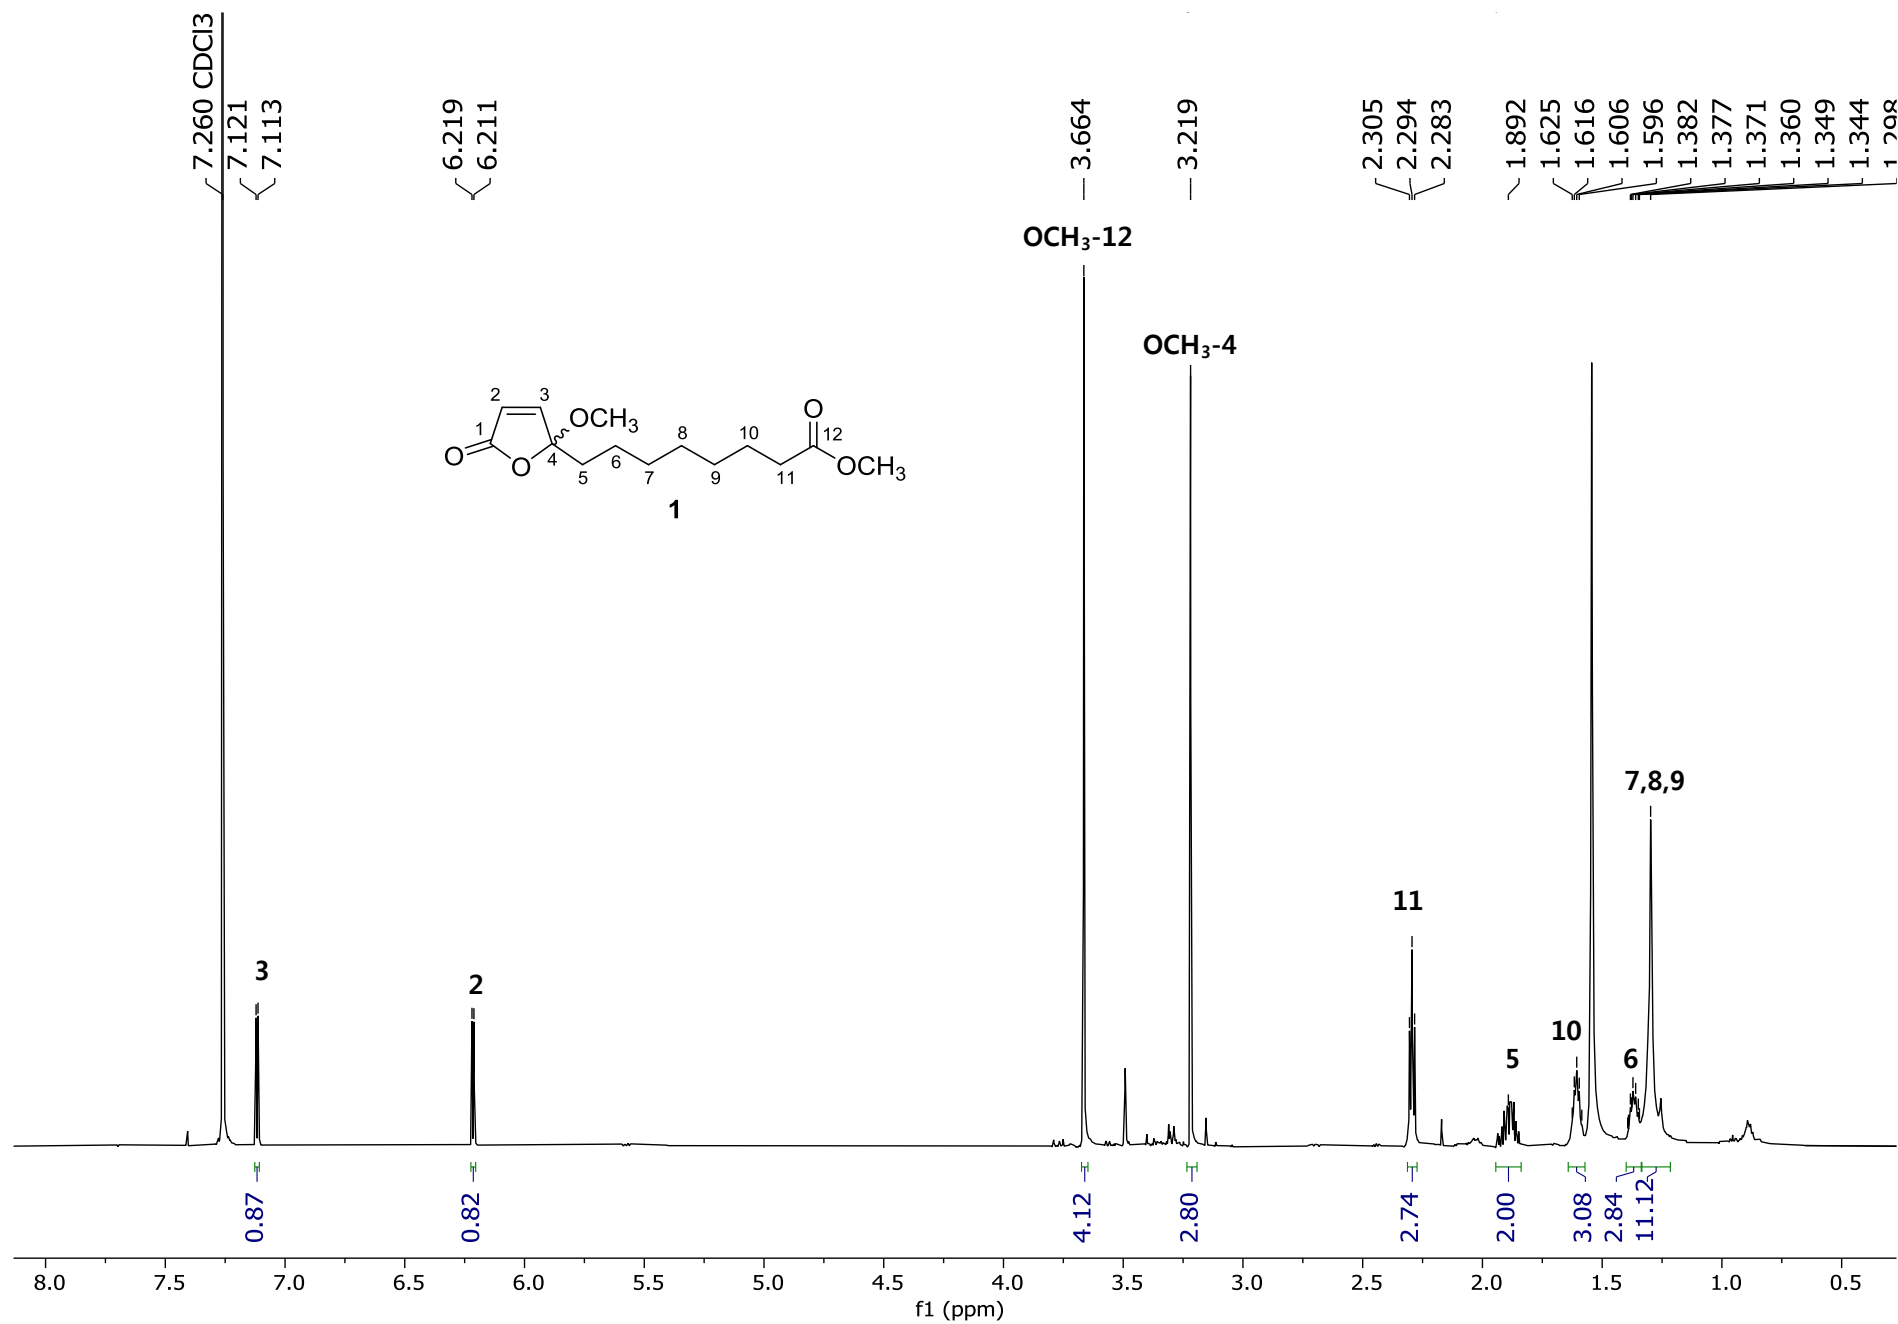

**Figure S3.**  $^{13}\text{C}$  NMR spectrum of **1** in chloroform-*d* (175 MHz)

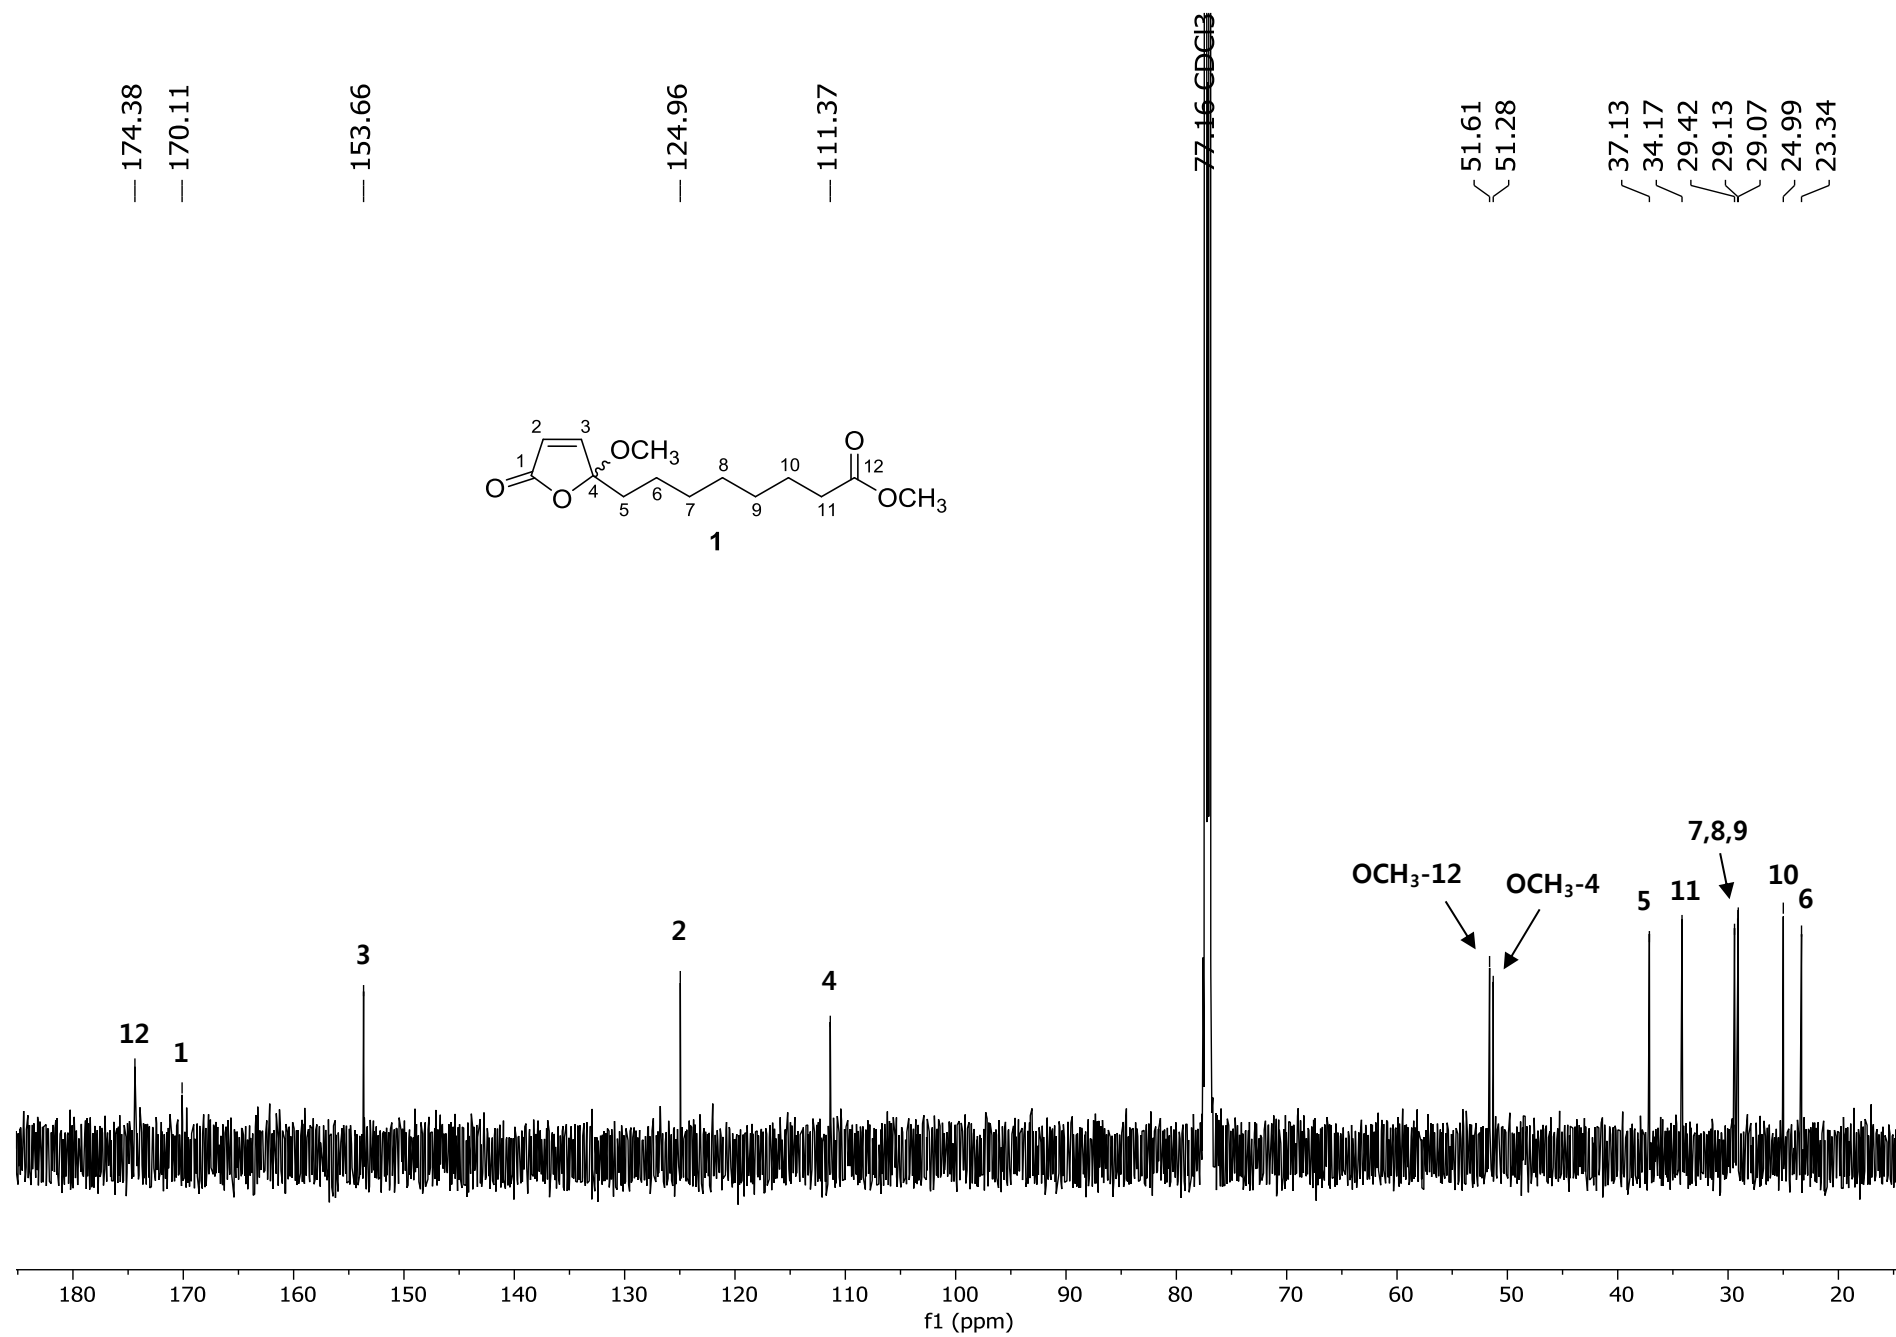

**Figure S4.** COSY spectrum of **1** in chloroform-*d*

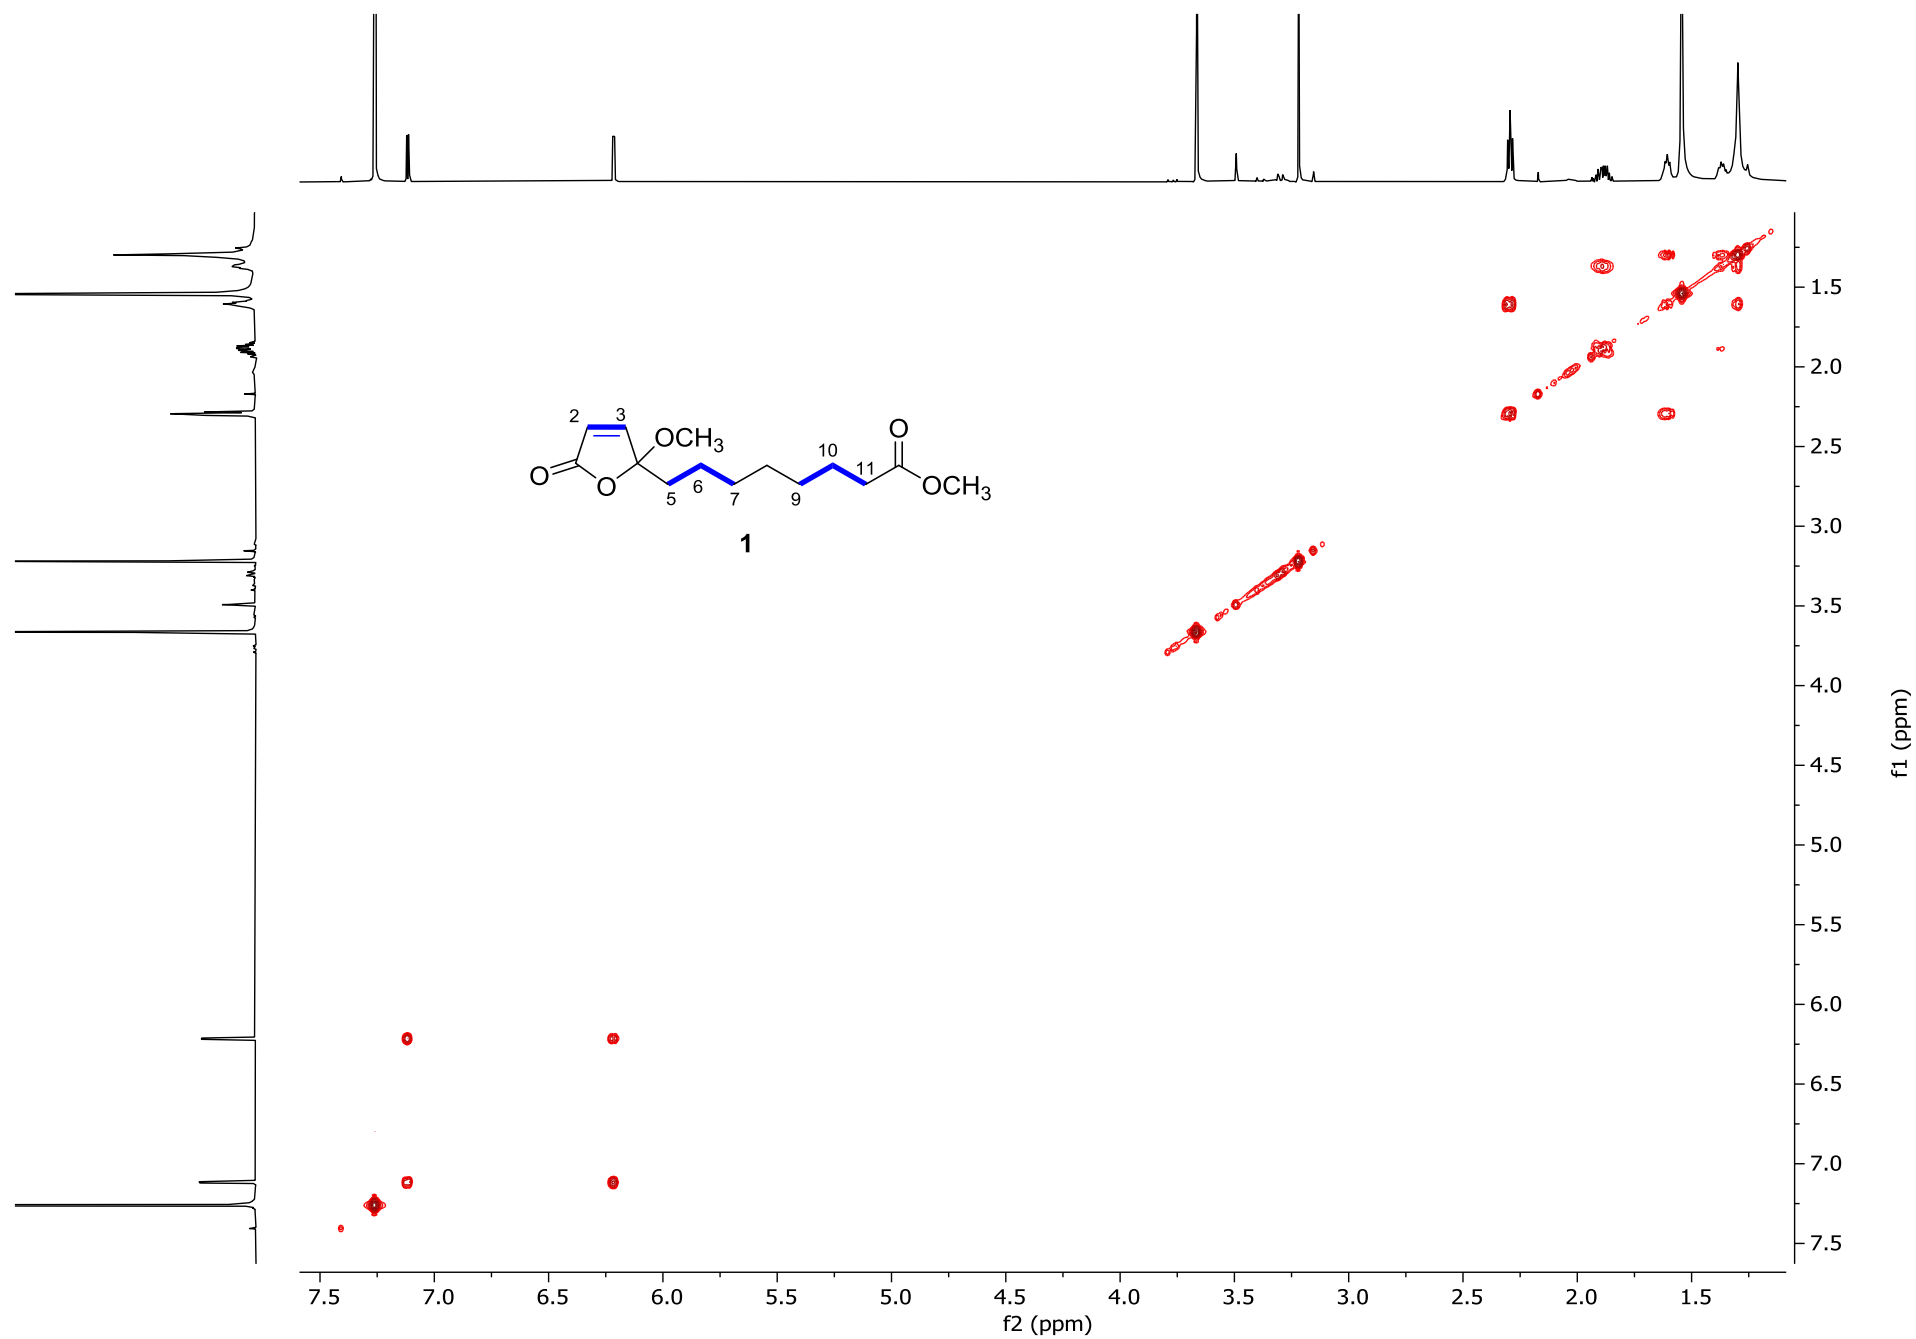

**Figure S5.** HSQC spectrum of **1** in chloroform-*d*

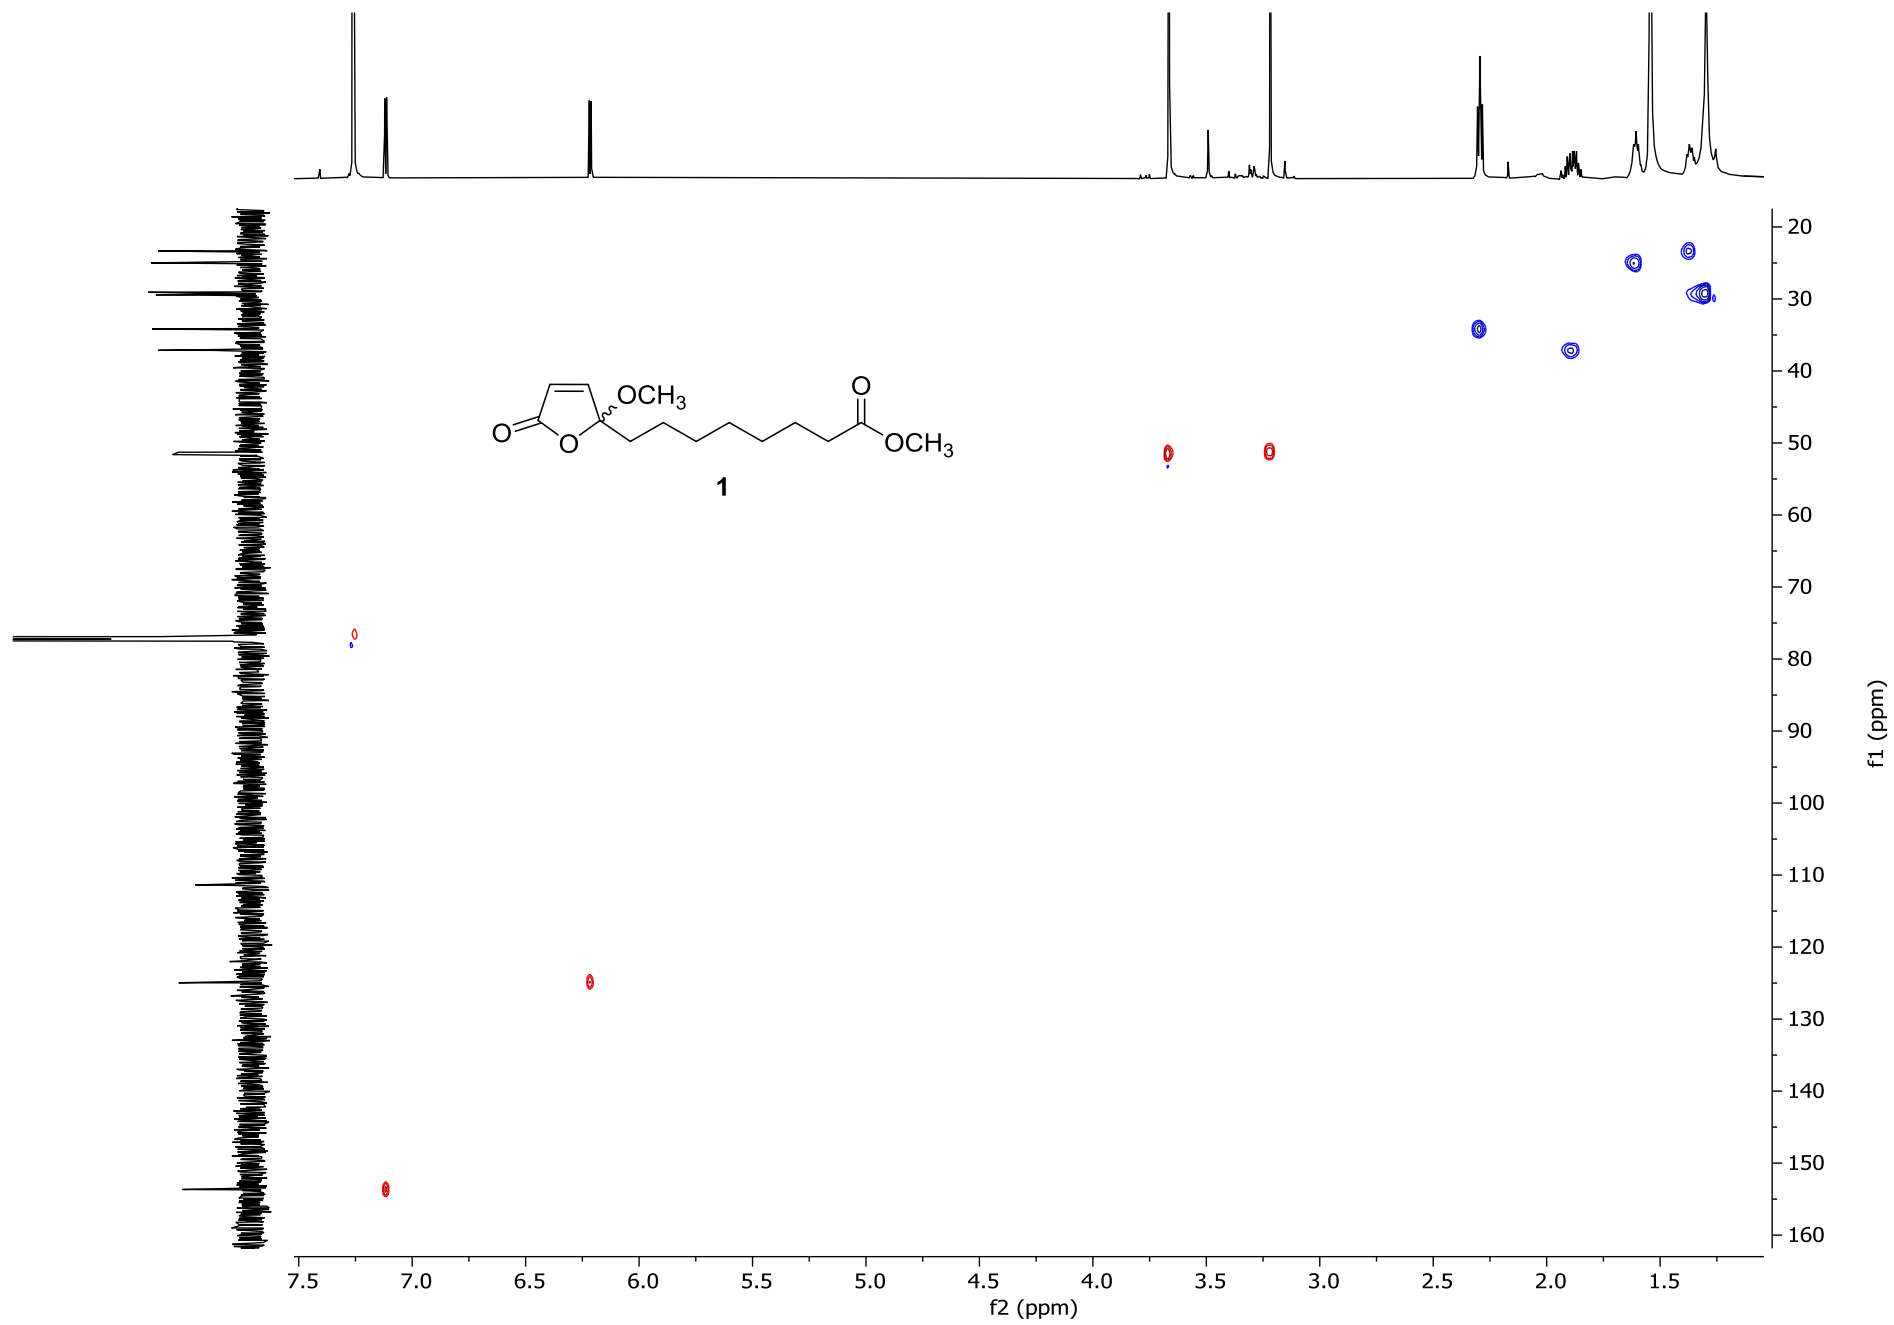

**Figure S6.** HMBC spectrum of **1** in chloroform-*d*

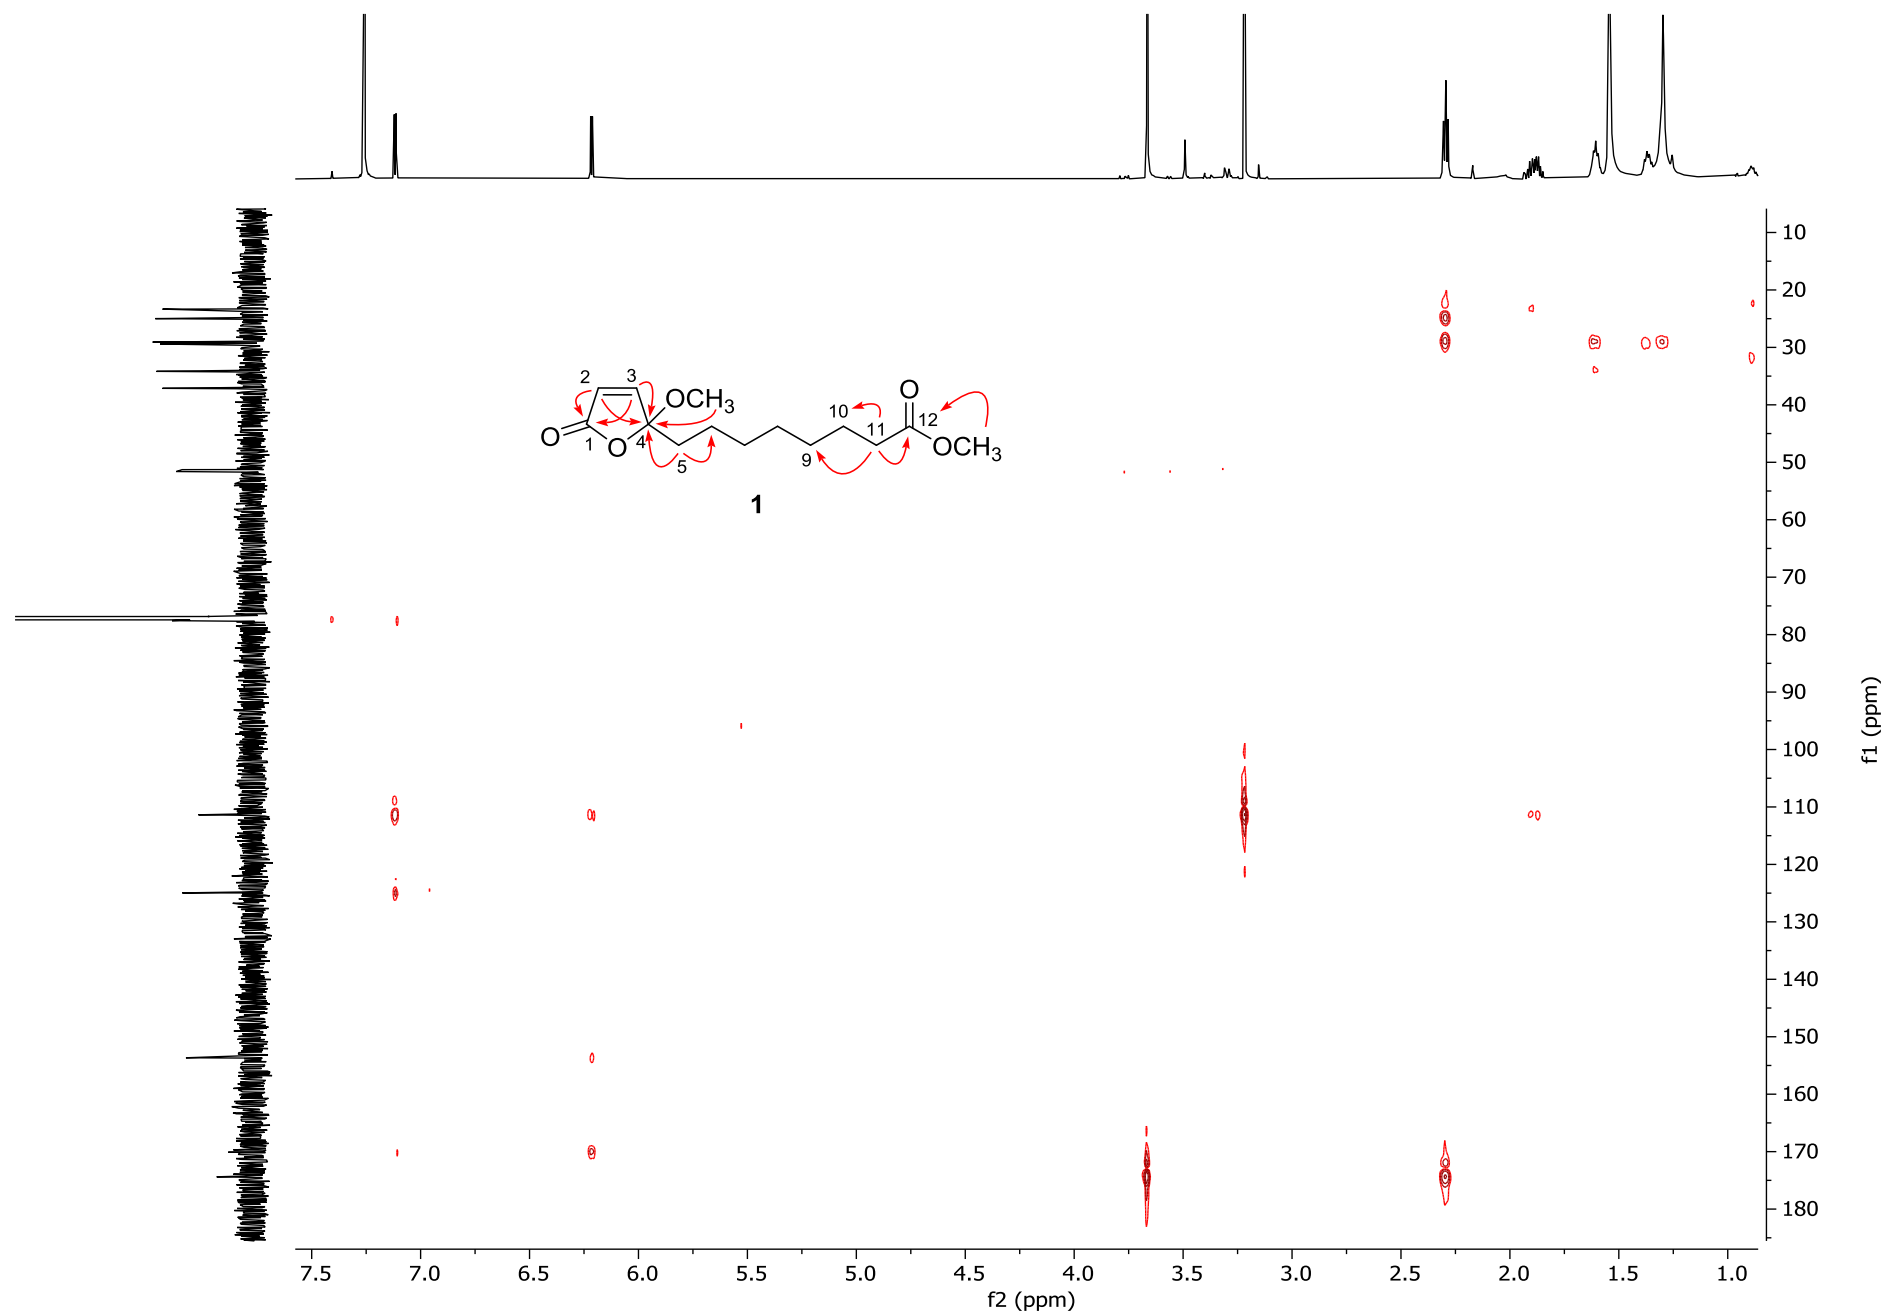



9.767  
9.763  
9.759

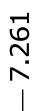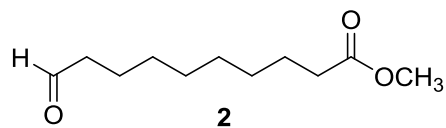

| Age Group | Number of People |
|-----------|------------------|
| 13-17     | 3,668            |
| 18-24     | 3,493            |
| 25-34     | 3,491            |
| 35-44     | 3,488            |
| 45-54     | 3,487            |
| 55-64     | 3,312            |
| 65-74     | 2,435            |
| 75-84     | 2,431            |
| 85-94     | 2,420            |
| 95-104    | 2,416            |
| 105-114   | 2,405            |
| 115-124   | 2,402            |
| 125-134   | 2,318            |
| 135-144   | 2,303            |
| 145-154   | 2,288            |
| 155-164   | 1,628            |
| 165-174   | 1,622            |
| 175-184   | 1,614            |
| 185-194   | 1,448            |
| 195-204   | 1,328            |

**Figure S8.**  $^{13}\text{C}$  NMR spectrum of **2** in chloroform-*d* (175 MHz)

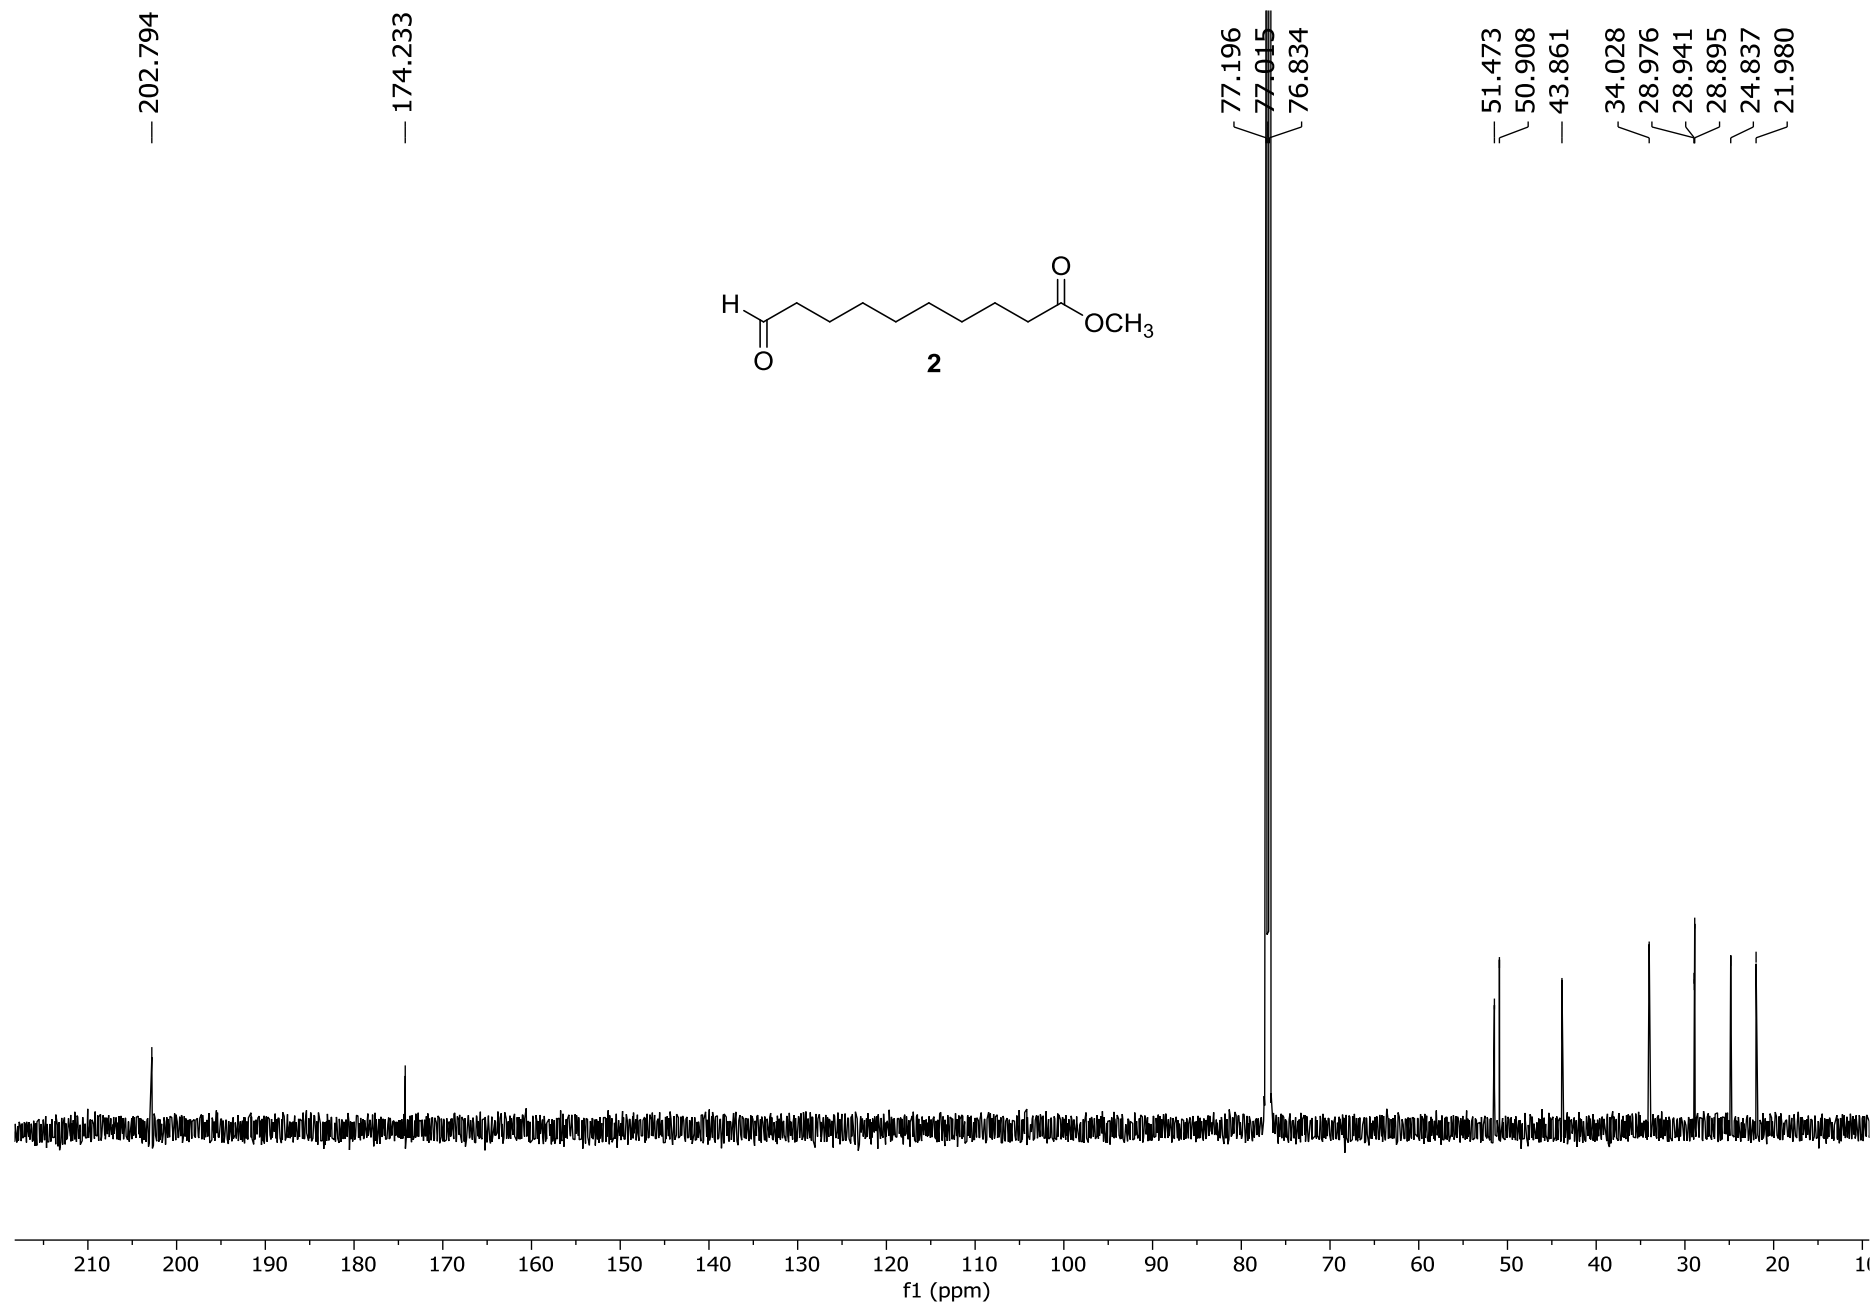

**Figure S9.**  $^1\text{H}$  NMR spectrum of **3** in chloroform-*d* (700 MHz)

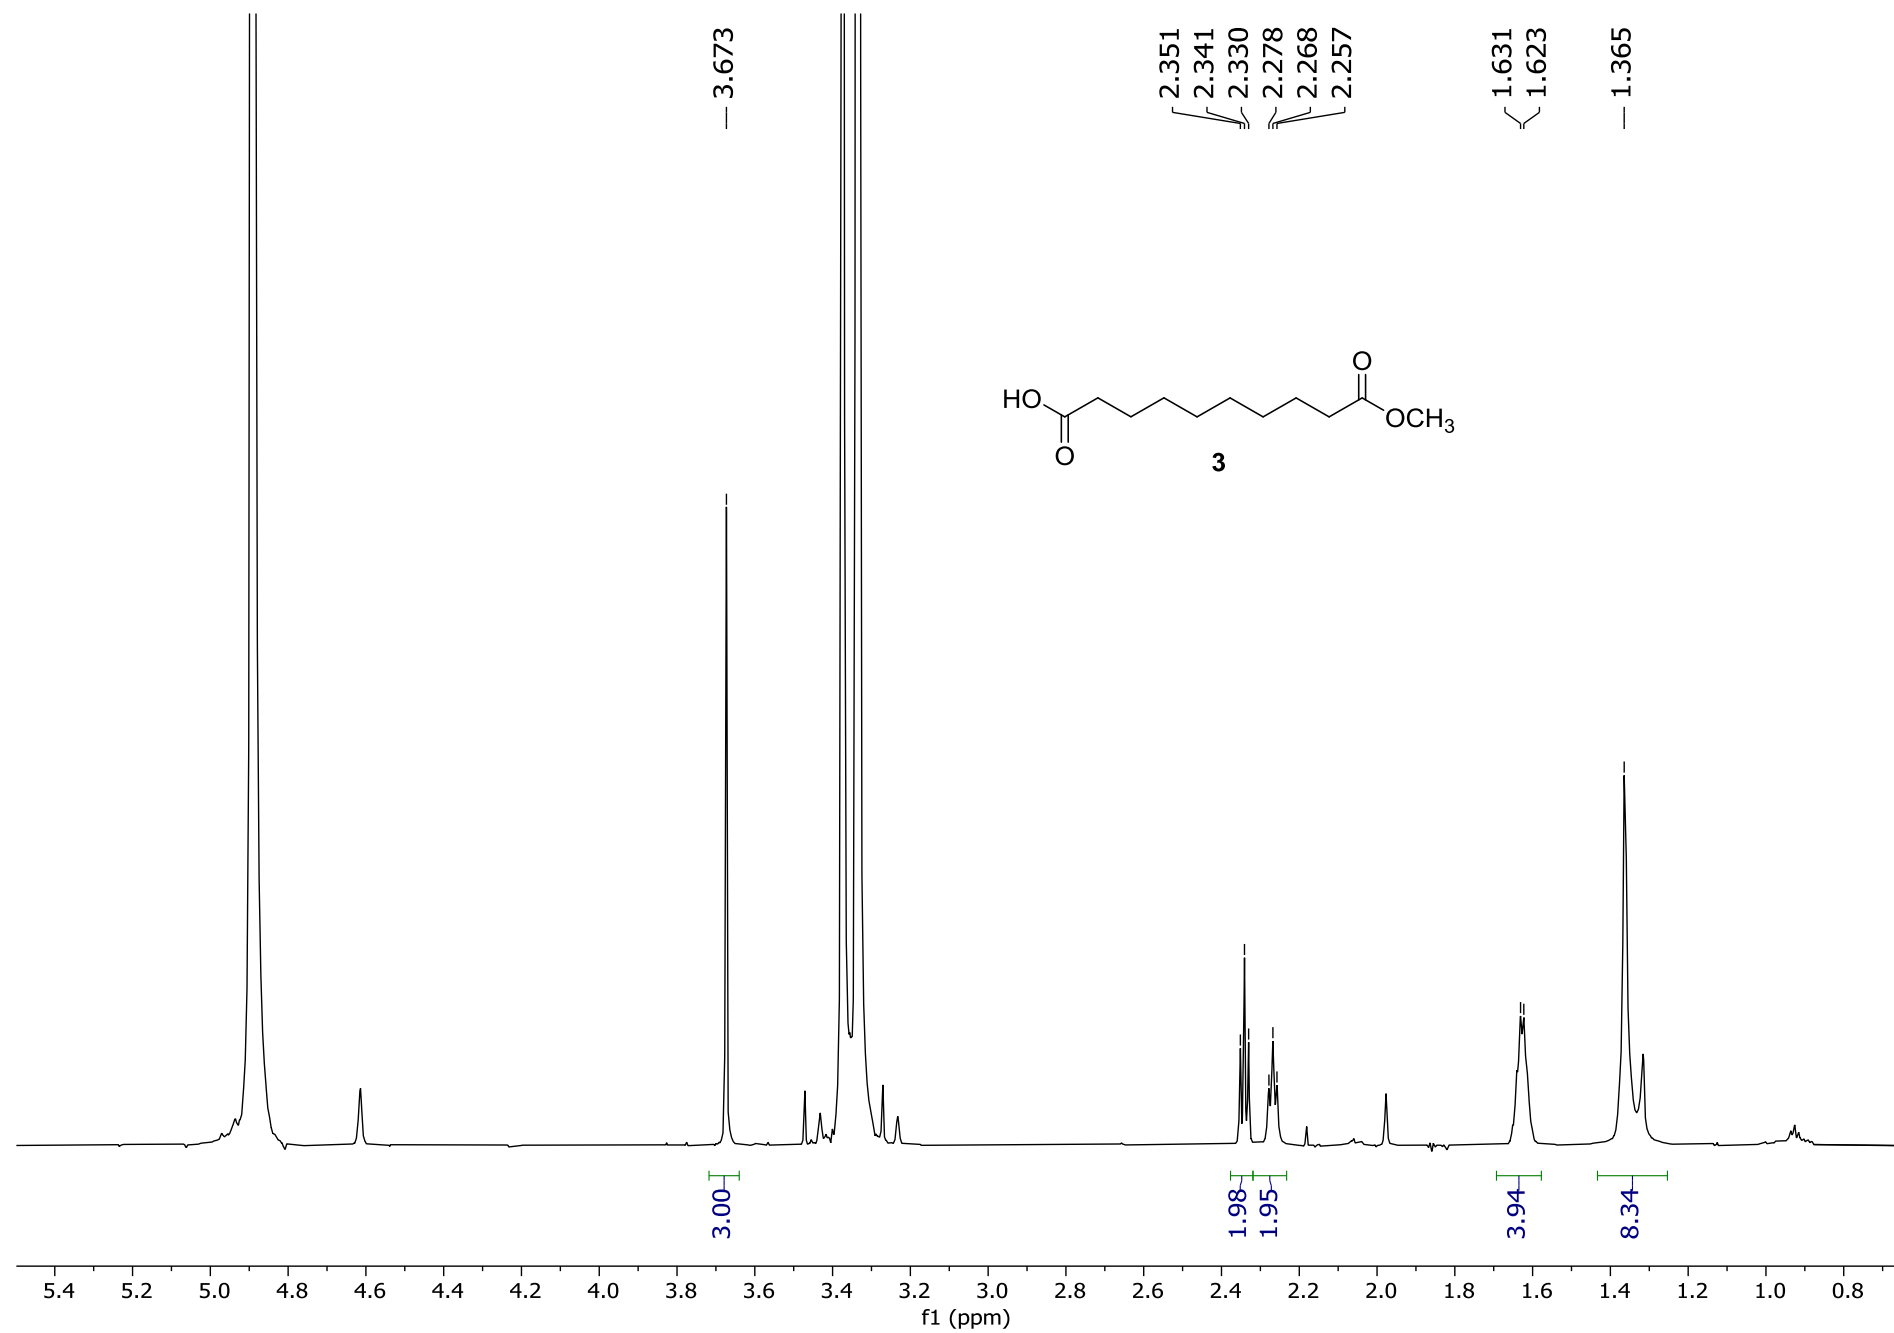

**Figure S10.**  $^1\text{H}$  NMR spectrum of **4** in methanol- $d_4$  (700 MHz)

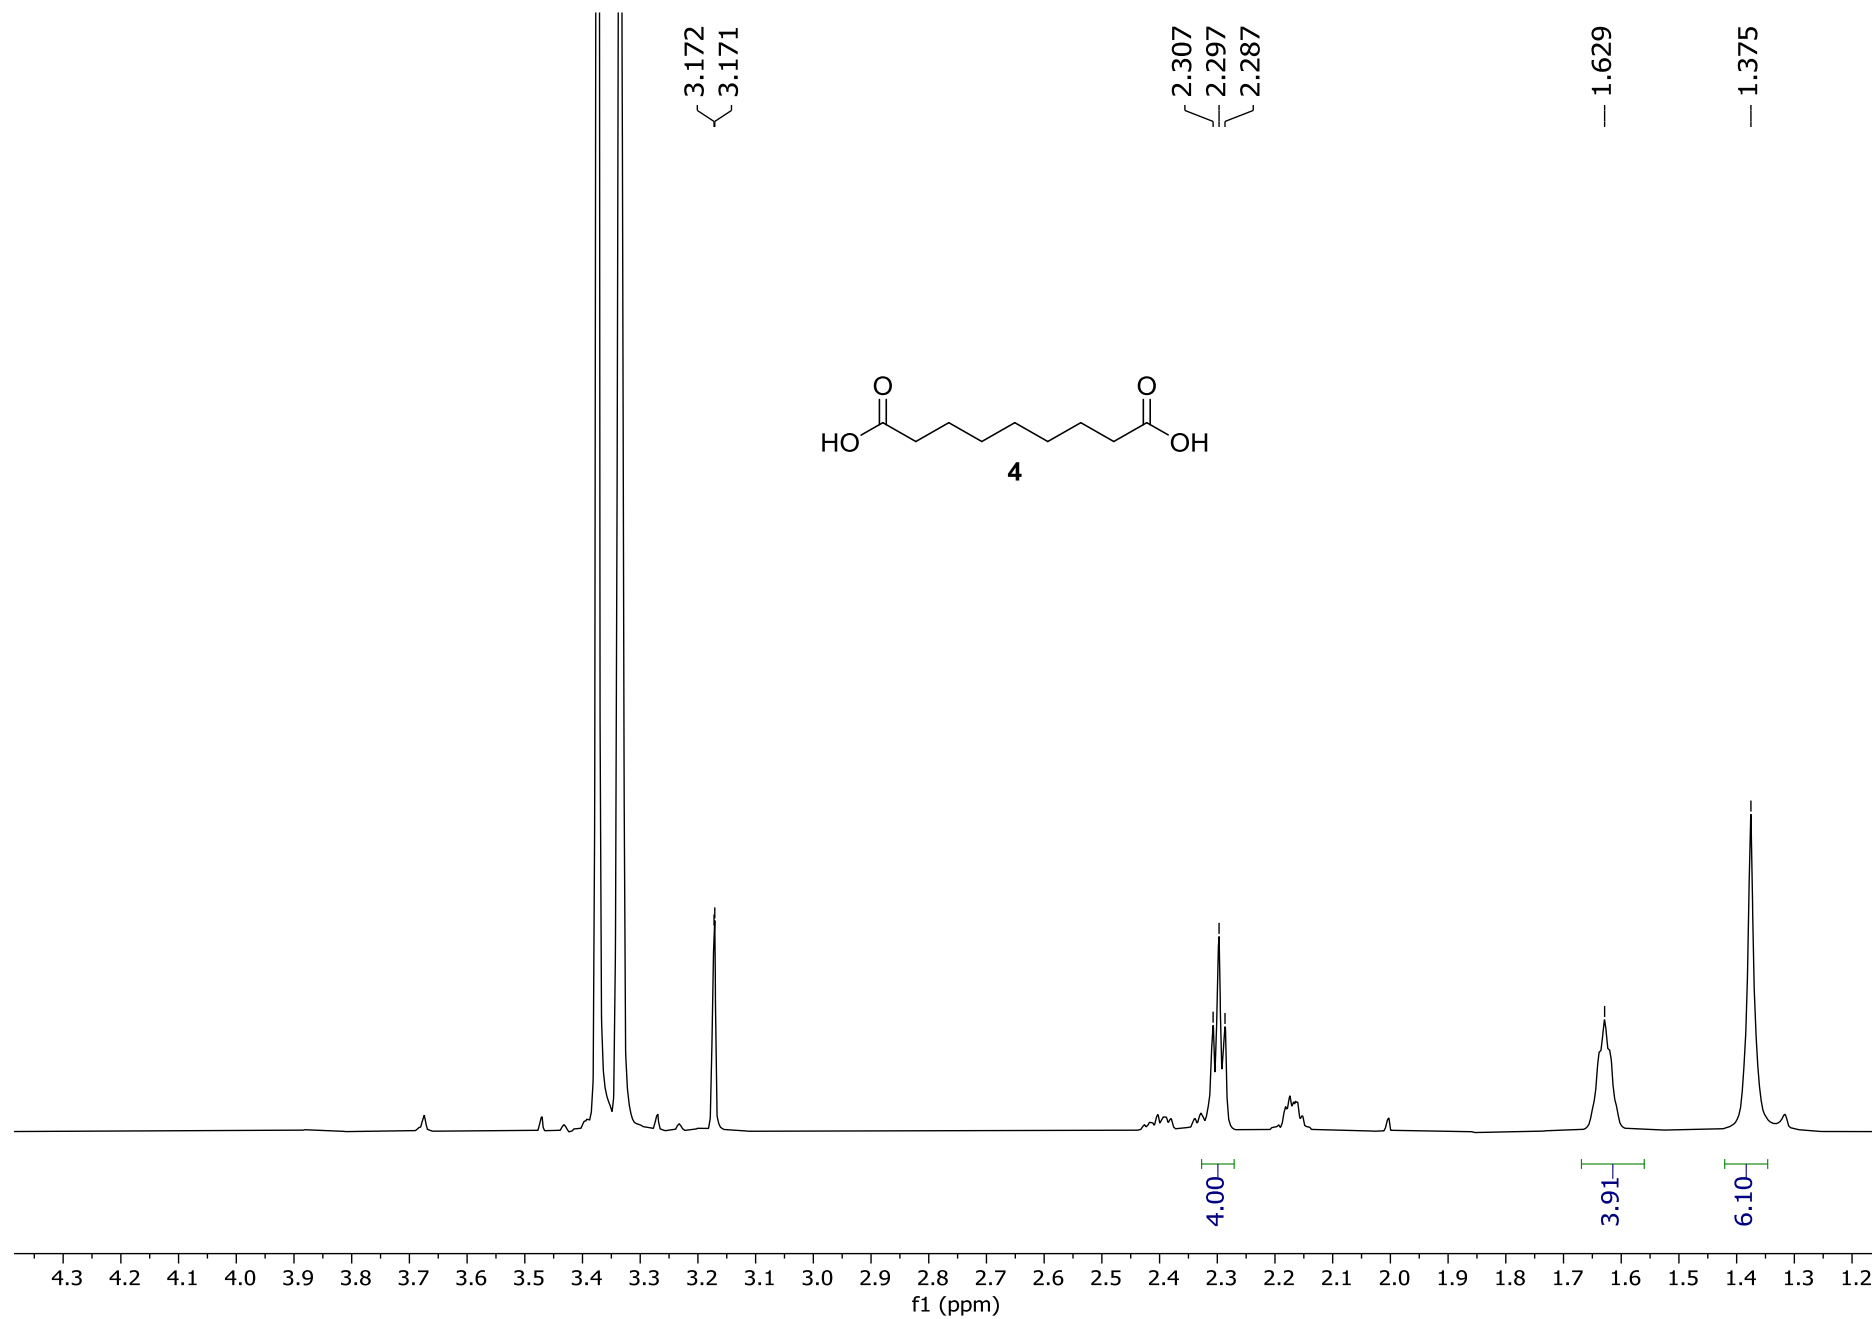

**Figure S11.**  $^1\text{H}$  NMR spectrum of **5** in chloroform-*d* (700 MHz)

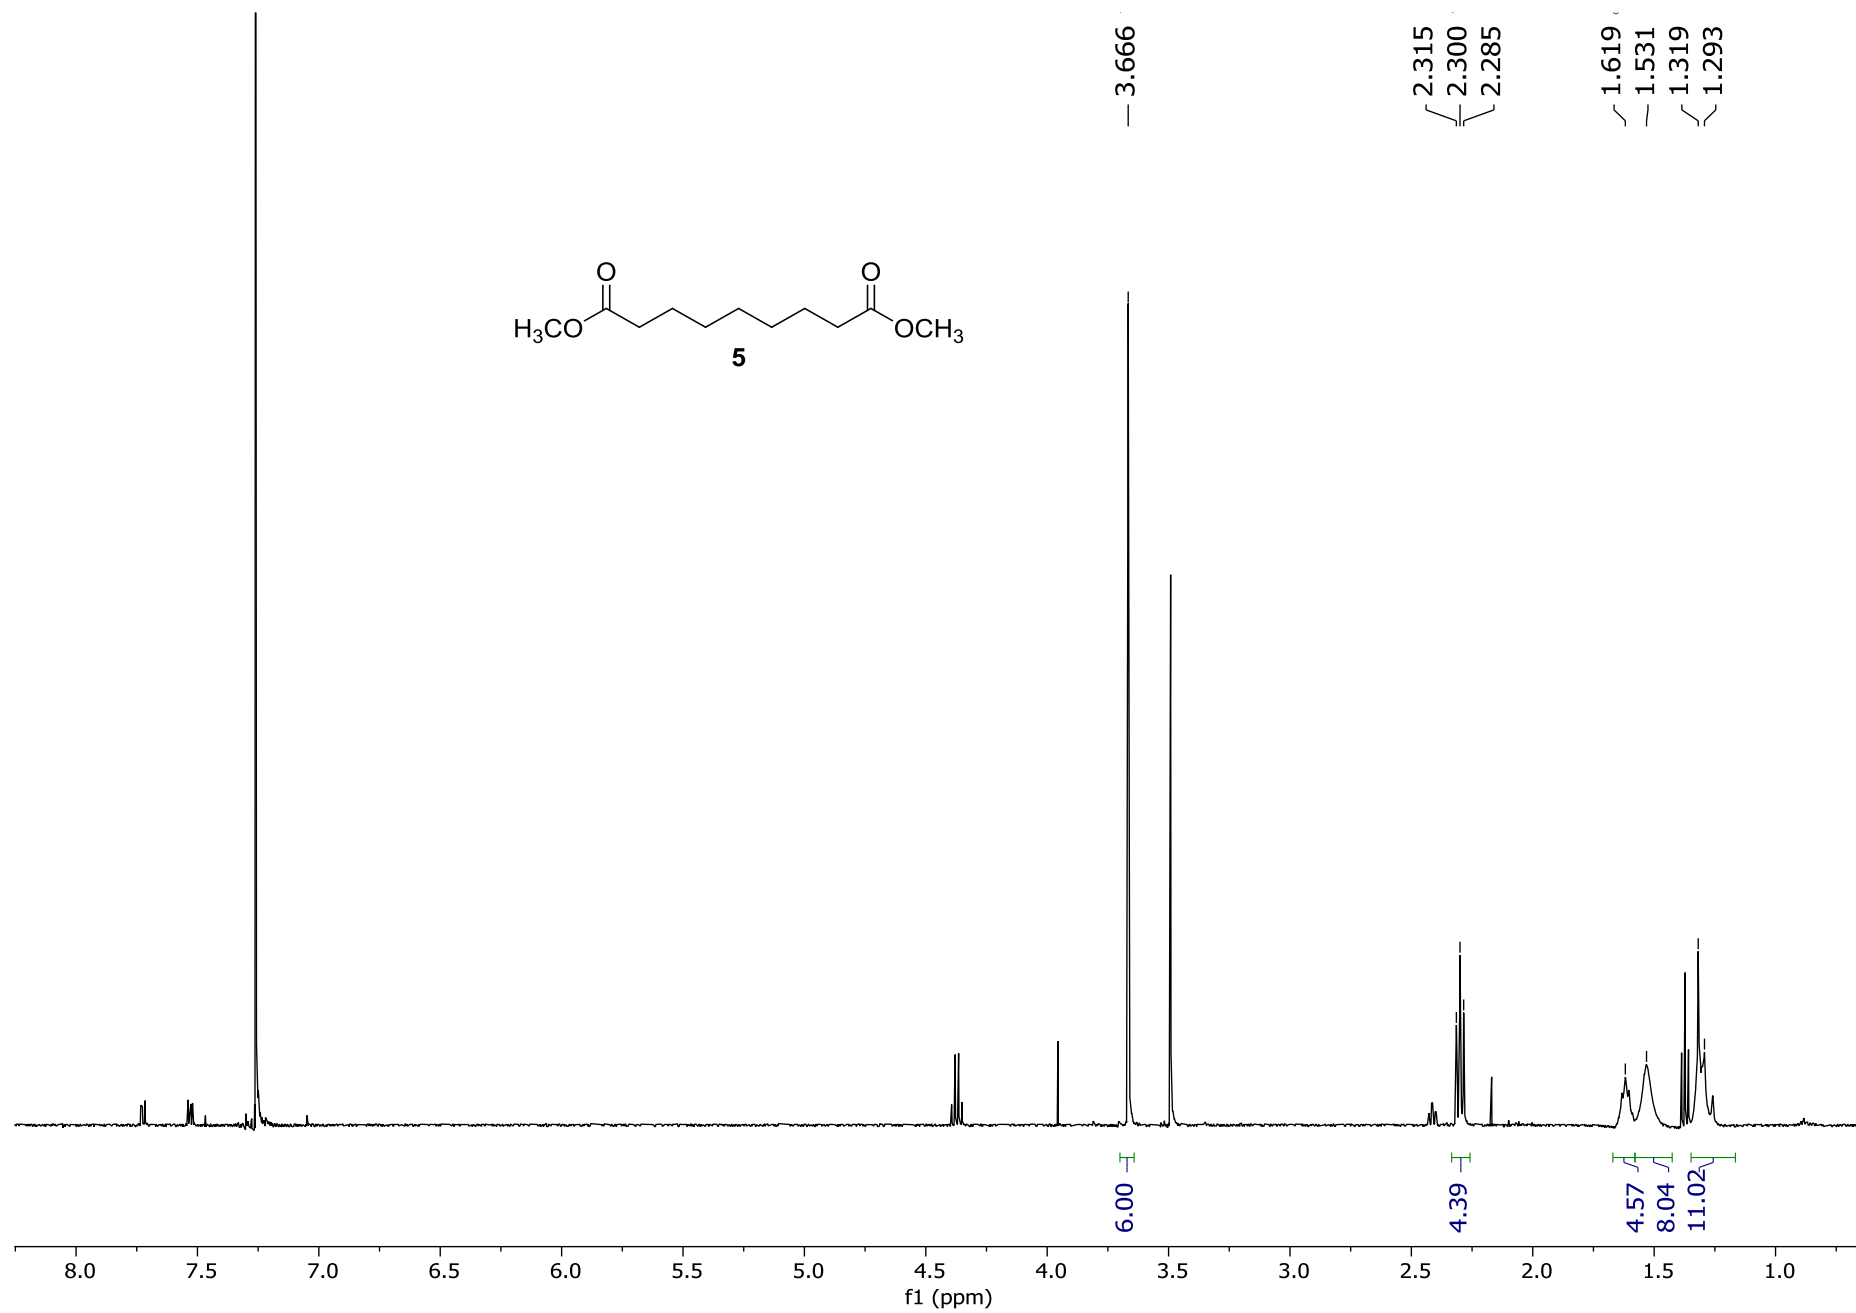

**Figure S12.**  $^{13}\text{C}$  NMR spectrum of **5** in chloroform-*d* (175 MHz)

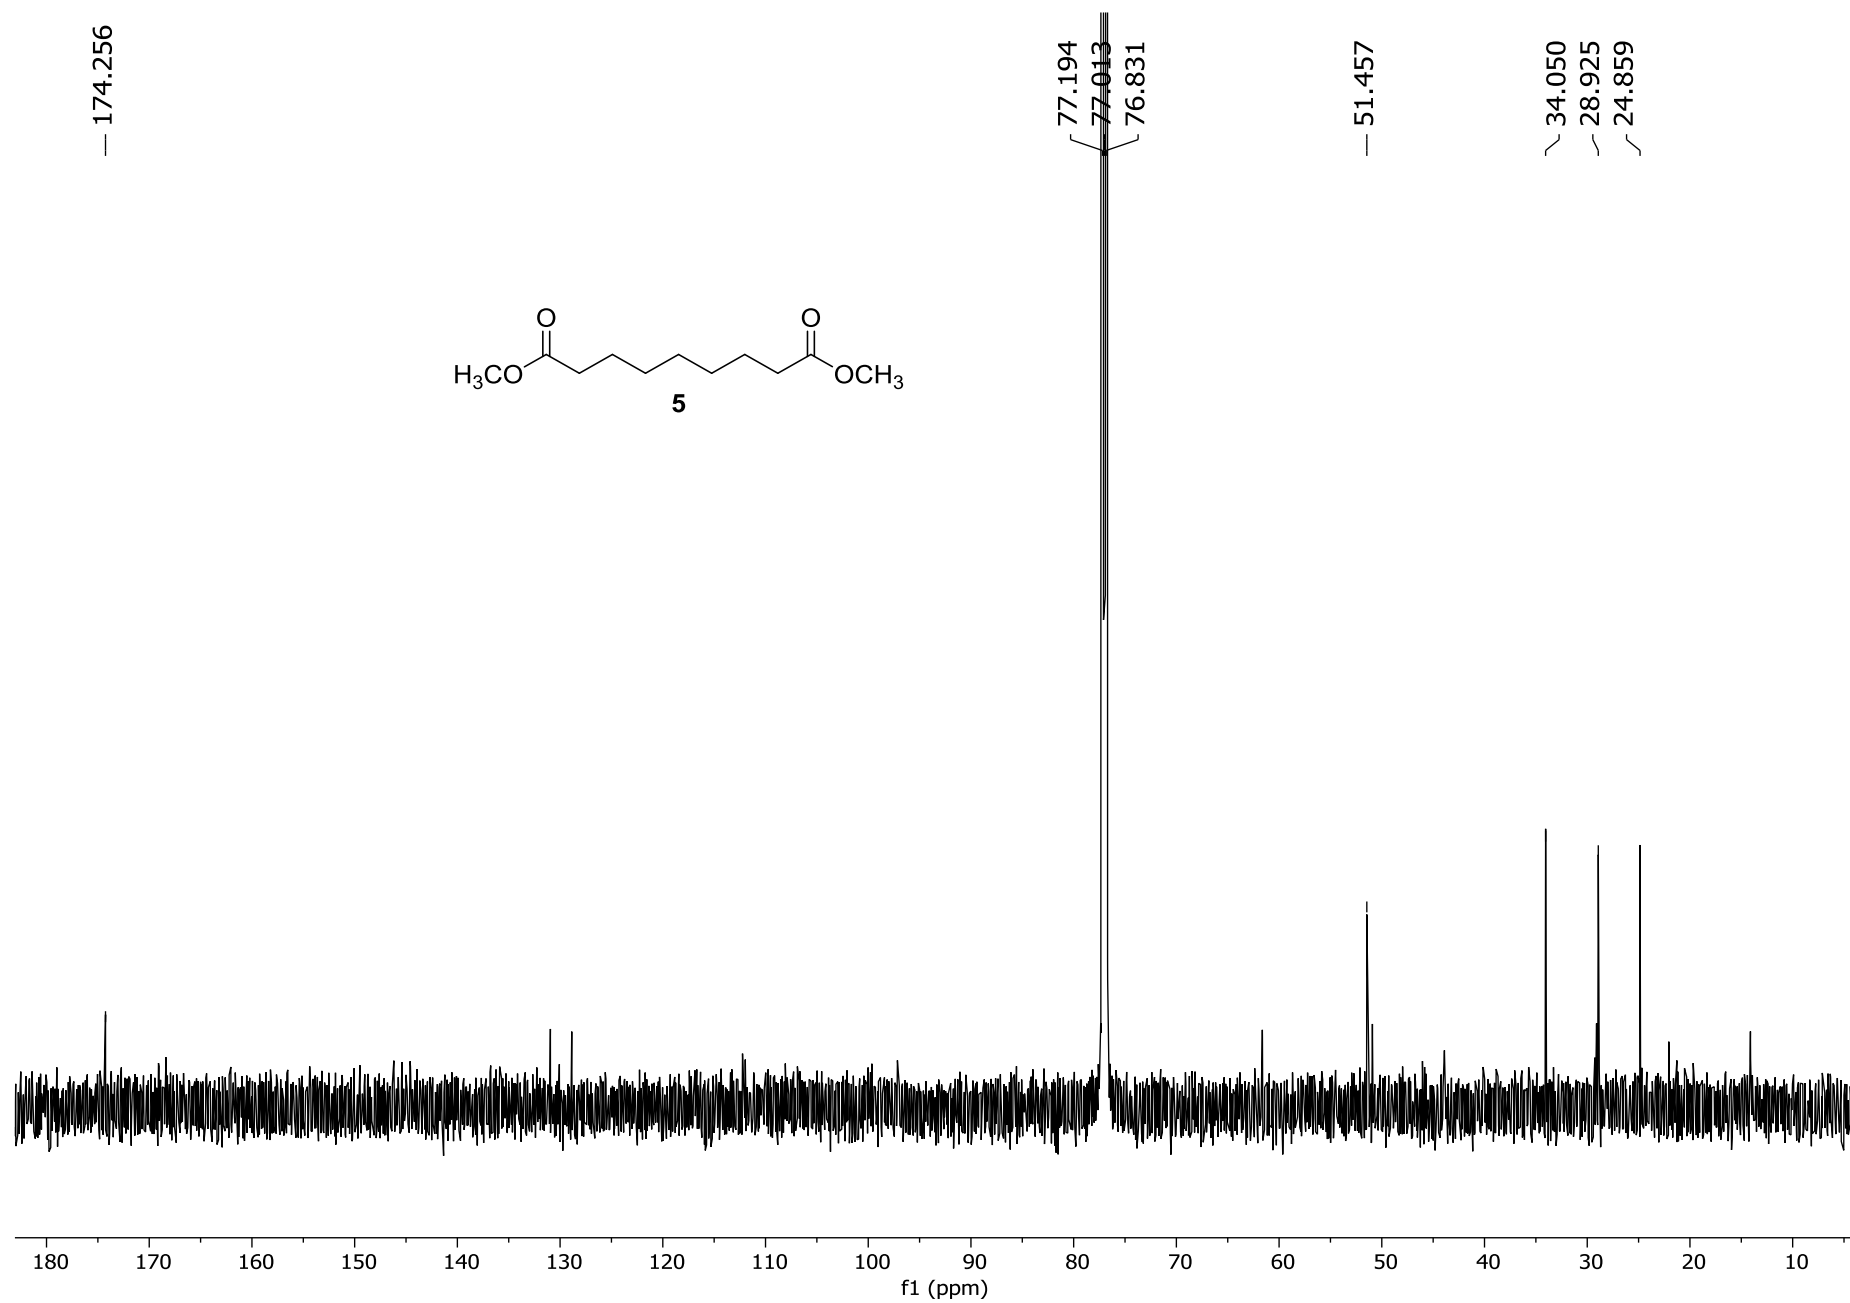

**Figure S13.**  $^1\text{H}$  NMR spectrum of **6** in methanol- $d_4$  (700 MHz)

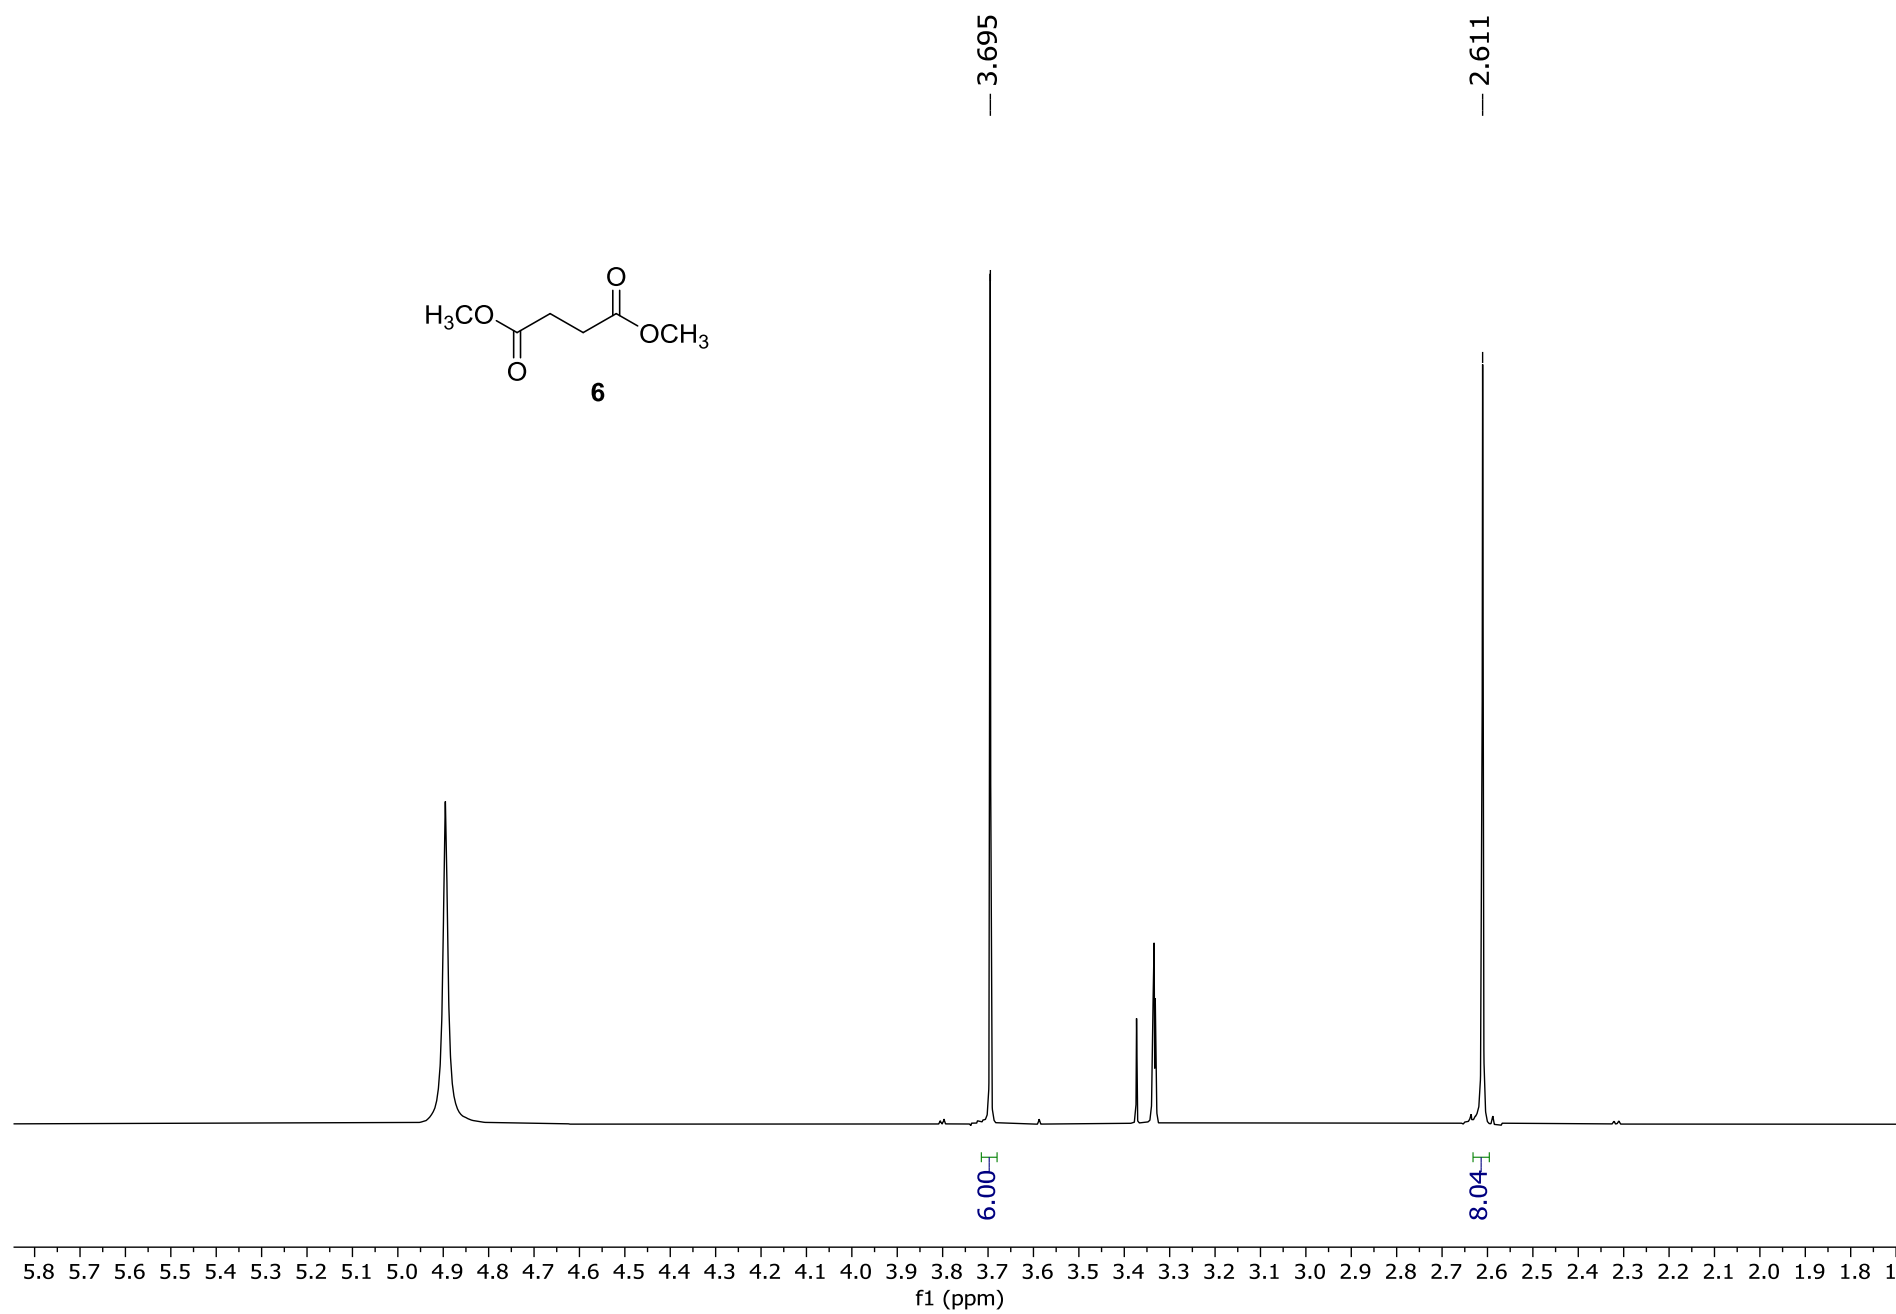

**Figure S14.**  $^{13}\text{C}$  NMR spectrum of **6** in methanol- $d_4$  (175 MHz)

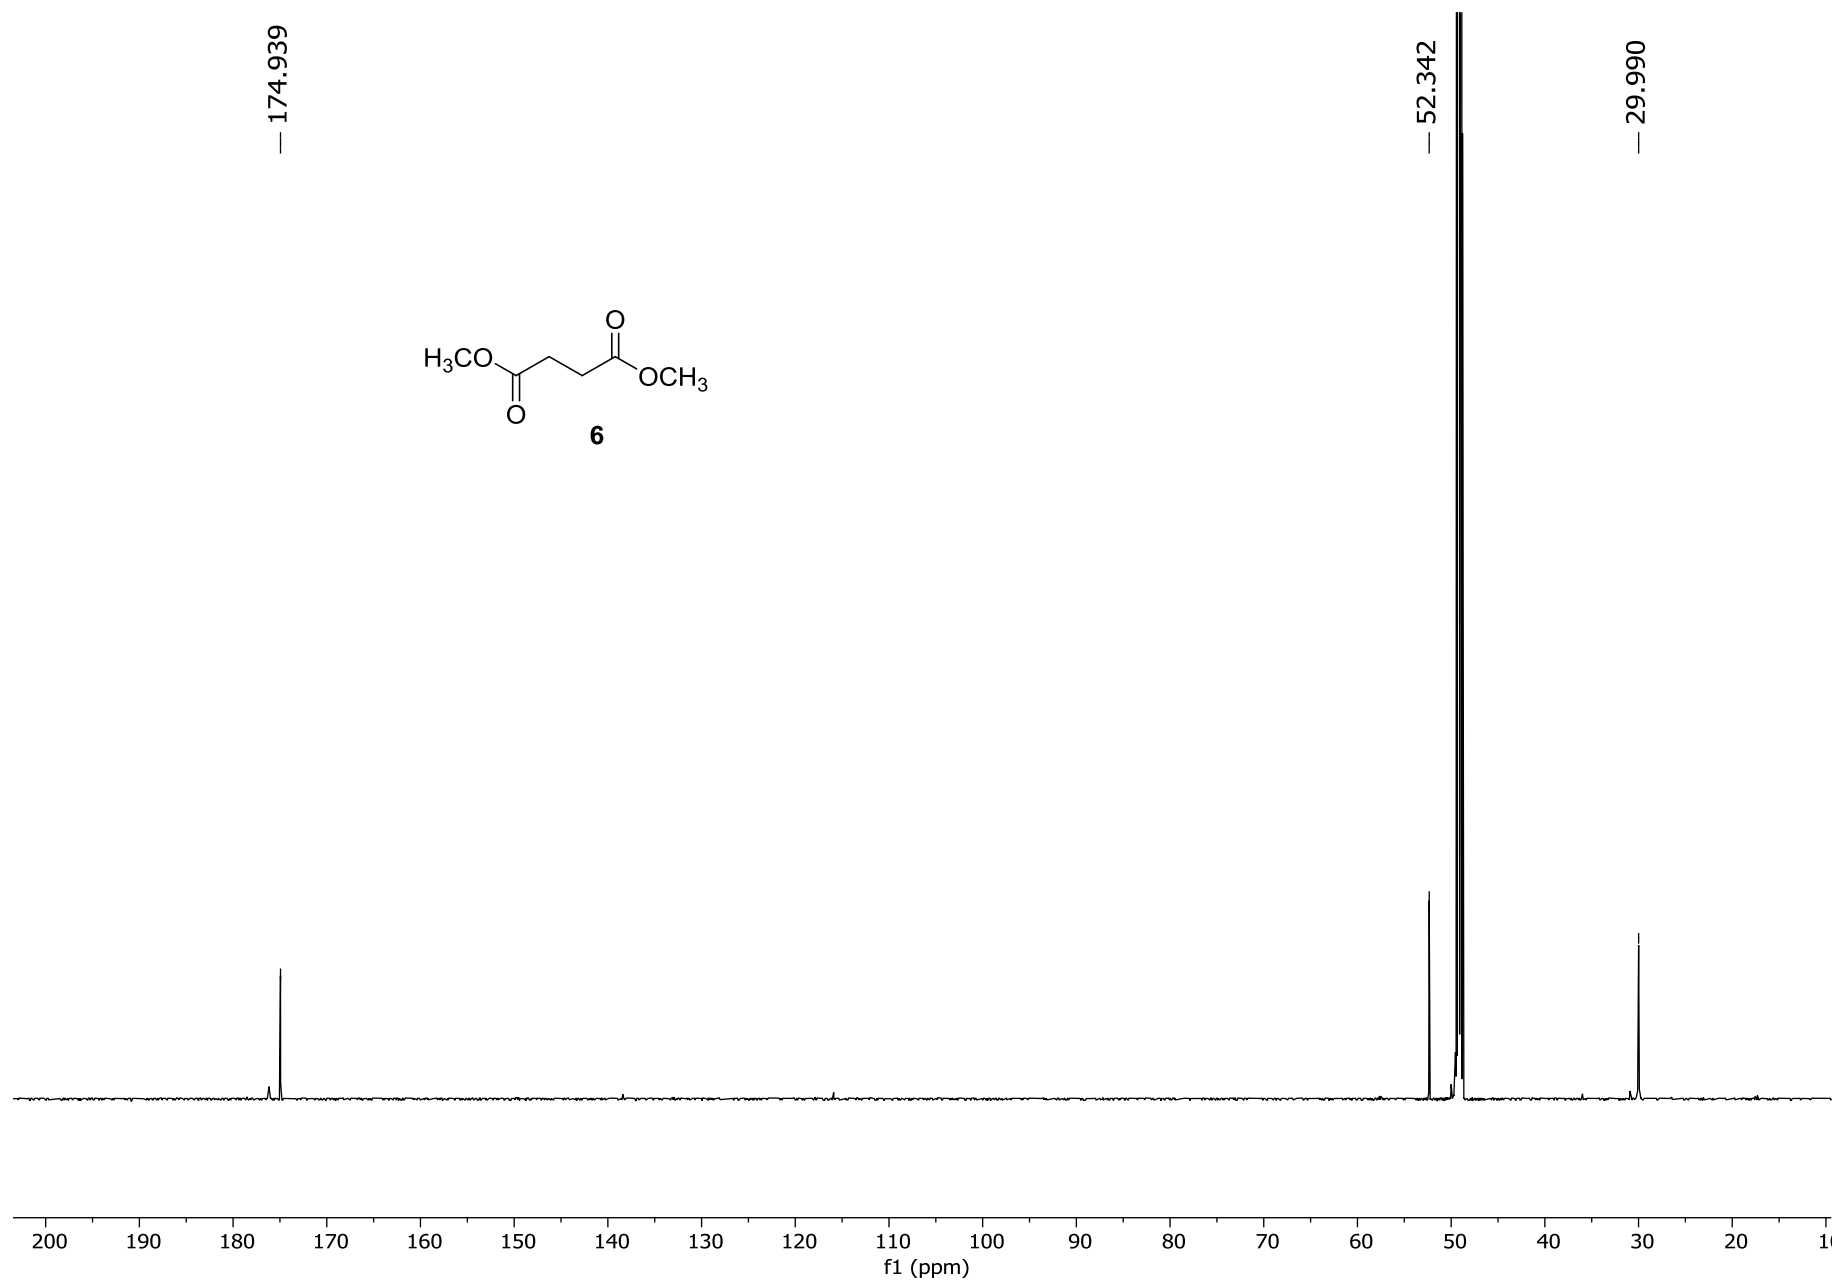



**Figure S15.**  $^1\text{H}$  NMR spectrum of **7** in methanol- $d_4$  (700 MHz)

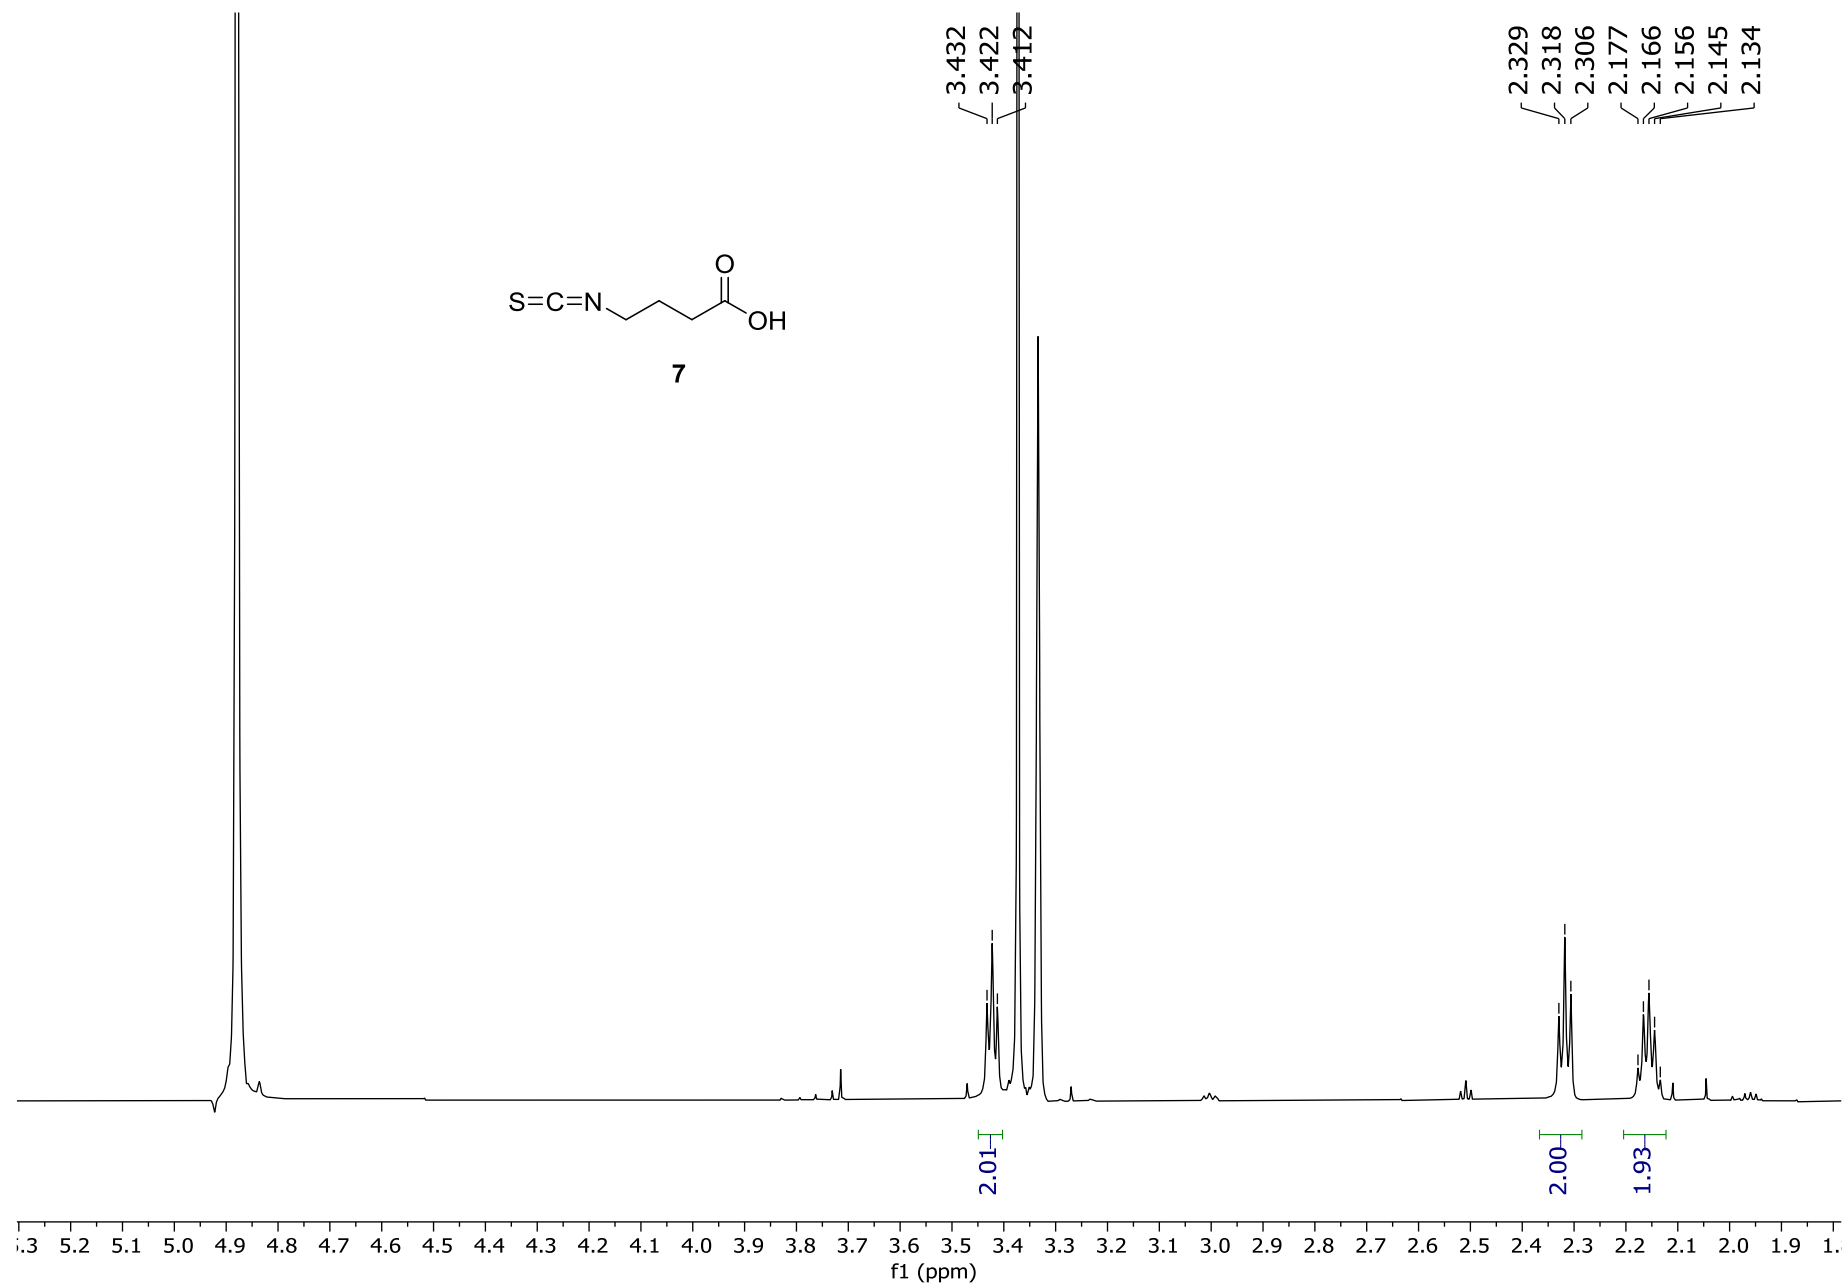

**Figure S16.**  $^{13}\text{C}$  NMR spectrum of **7** in methanol- $d_4$  (175 MHz)

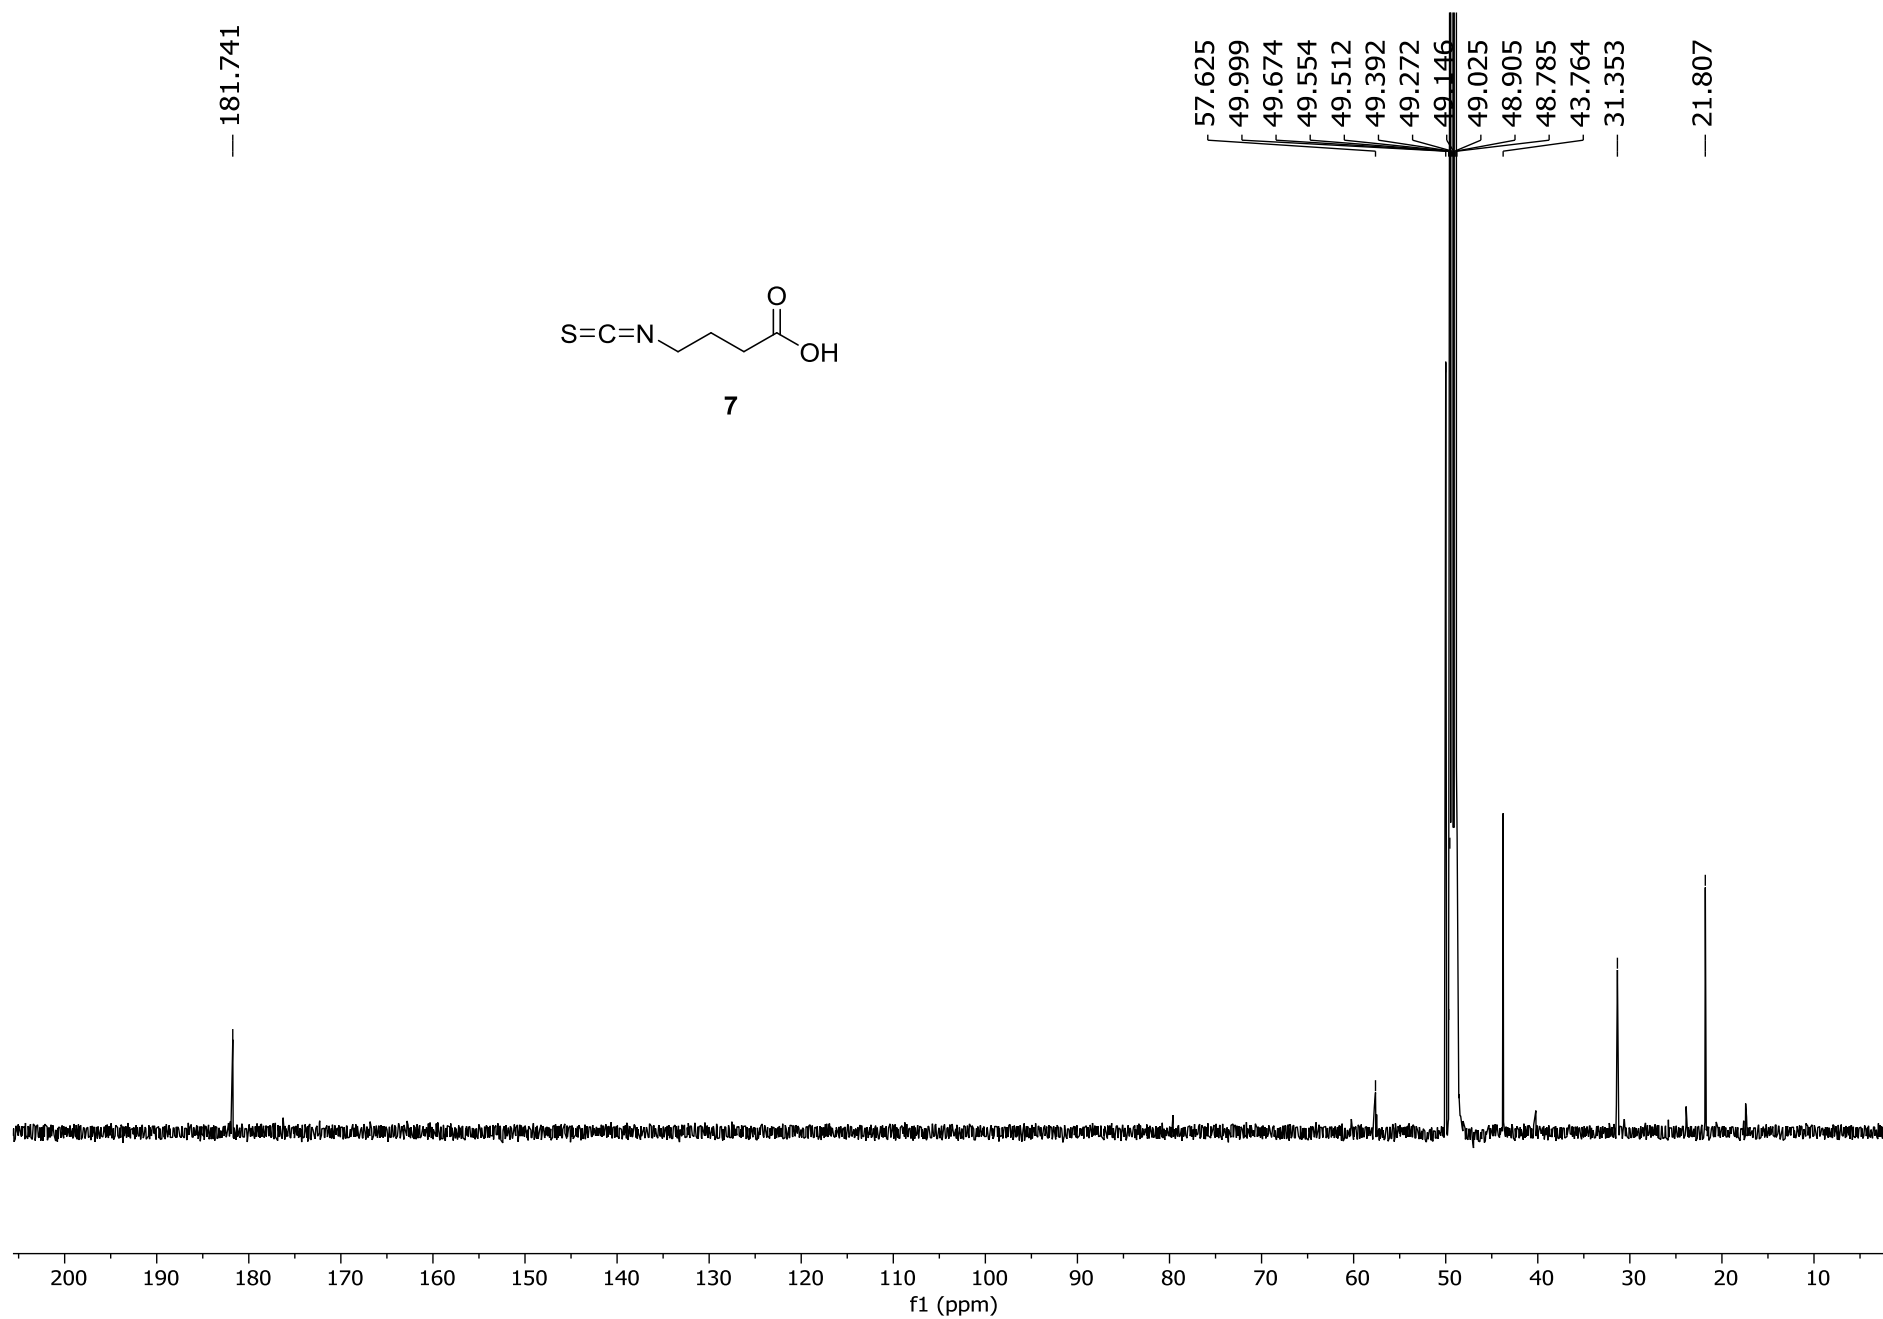

**Figure S17.**  $^1\text{H}$  NMR spectrum of **8** in chloroform-*d* (700 MHz)

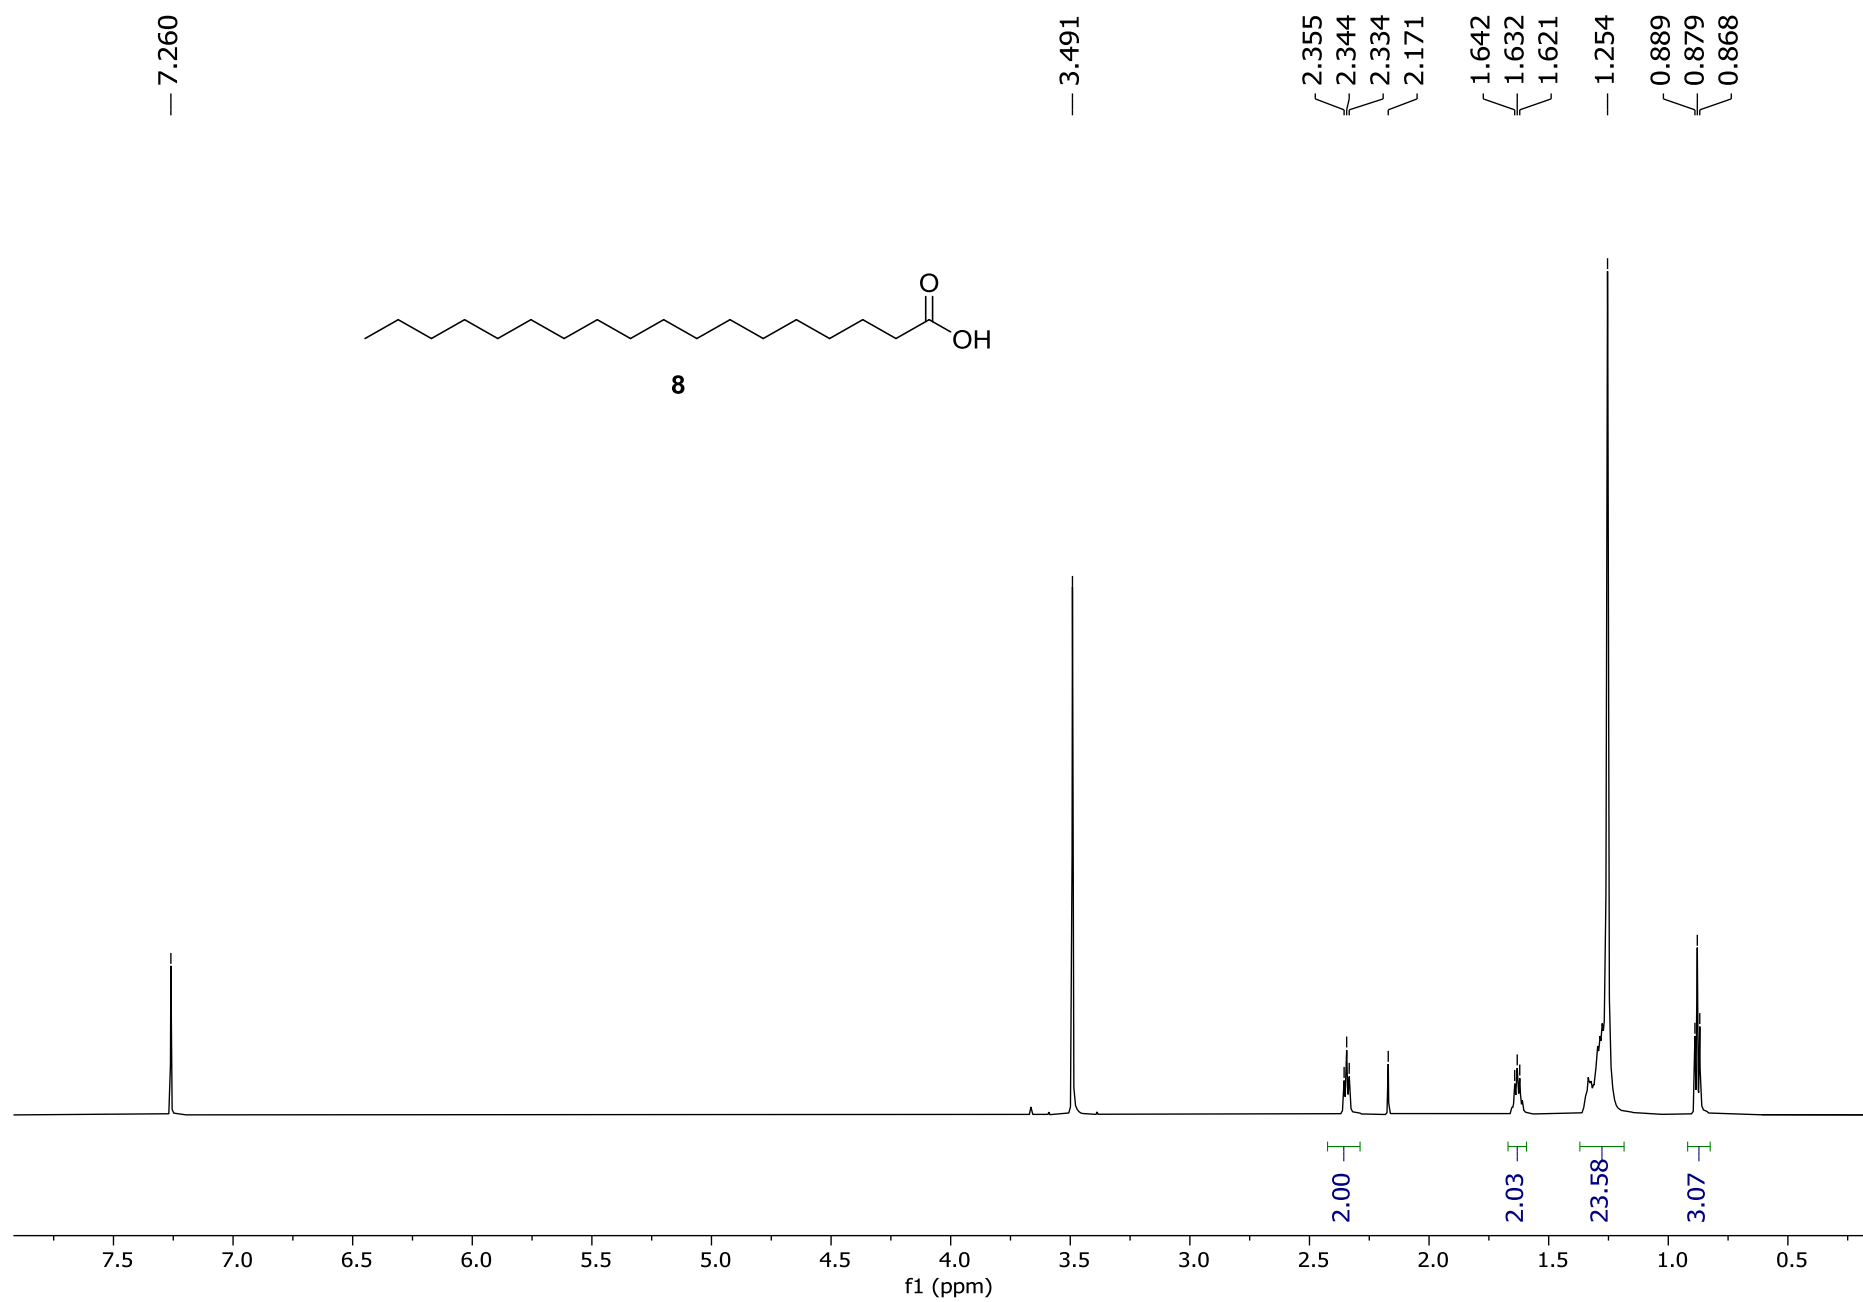

Chemical structure of methyl octadecanoate (**9**): CCCCCCCCCCCCCCCCCC(=O)OC

<sup>1</sup>H NMR spectrum (CDCl<sub>3</sub>) showing peaks and integrations:

| Chemical Shift (ppm)              | Integration |
|-----------------------------------|-------------|
| 3.665                             | 3.00        |
| 2.315, 2.300, 2.285               | 2.22        |
| 1.619, 1.603, 1.534, 1.288, 1.256 | 35.57       |
| 0.896, 0.882, 0.868               | 30.64       |
| 0.868                             | 3.54        |

**Figure S19.**  $^1\text{H}$  NMR spectrum of **10** in chloroform-*d* (700 MHz)

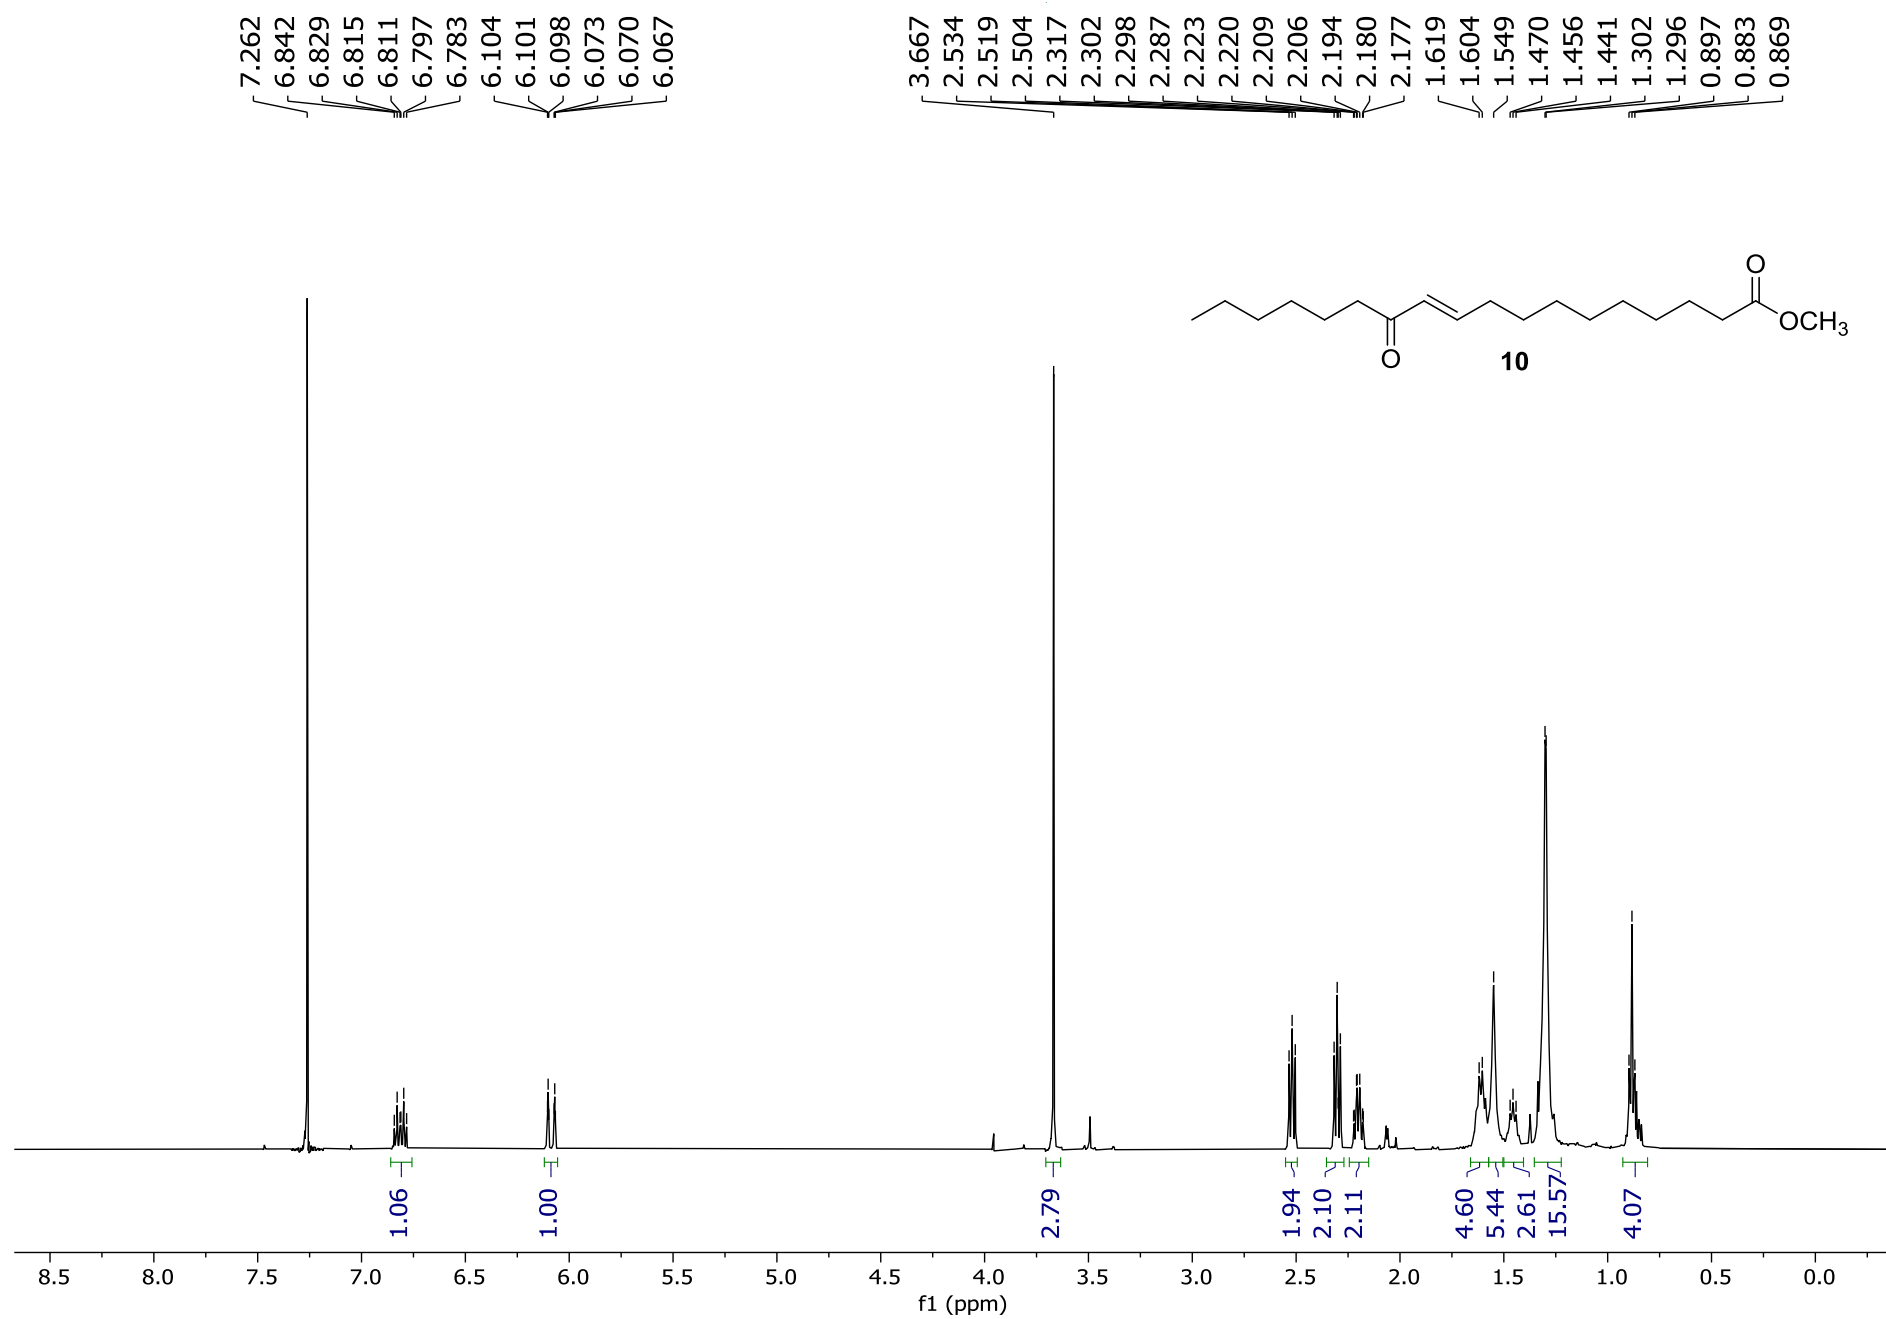

**Figure S20.**  $^{13}\text{C}$  NMR spectrum of **10** in chloroform-*d* (175 MHz)

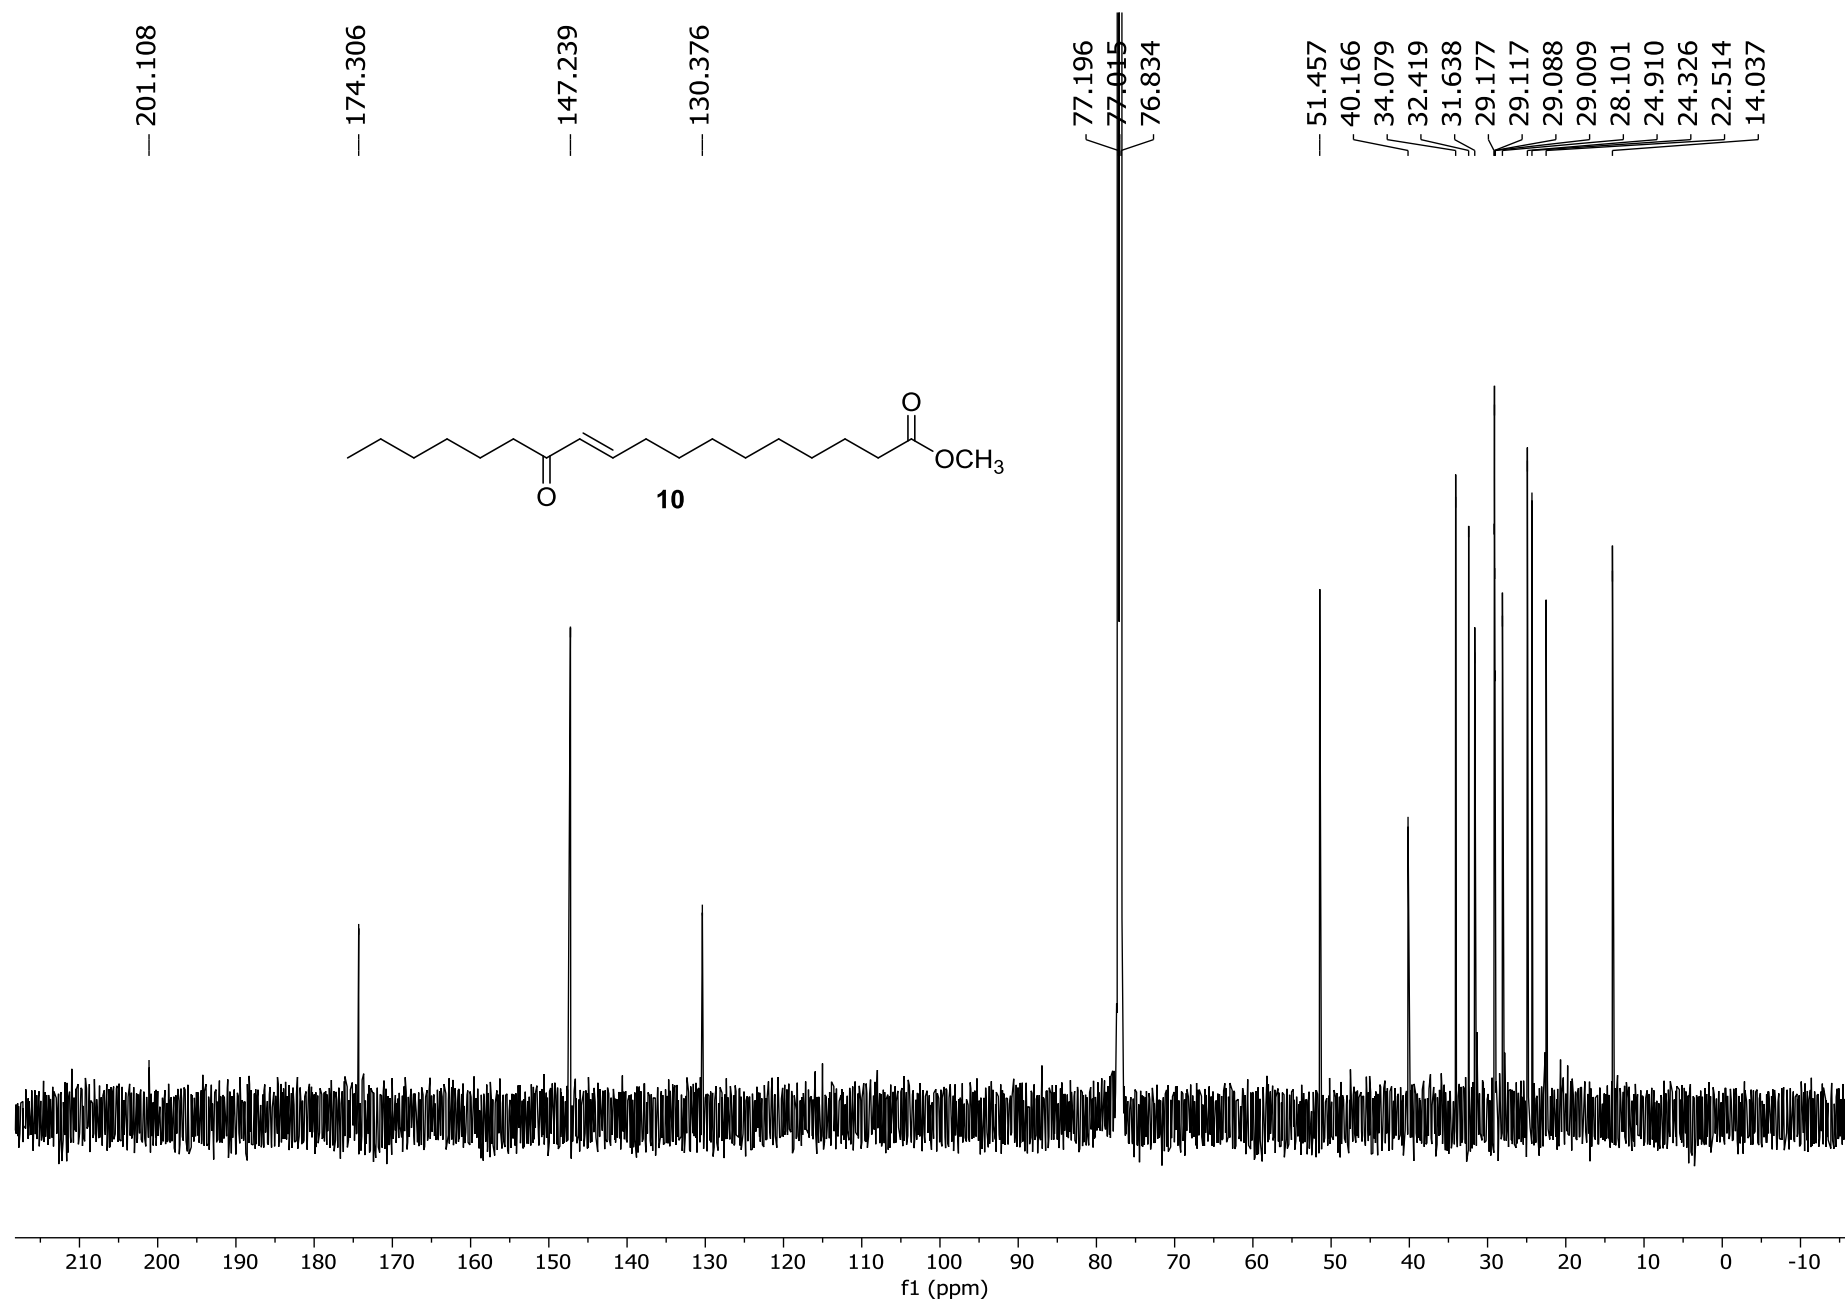

**Figure S21.**  $^1\text{H}$  NMR spectrum of **11** in chloroform-*d* (700 MHz)

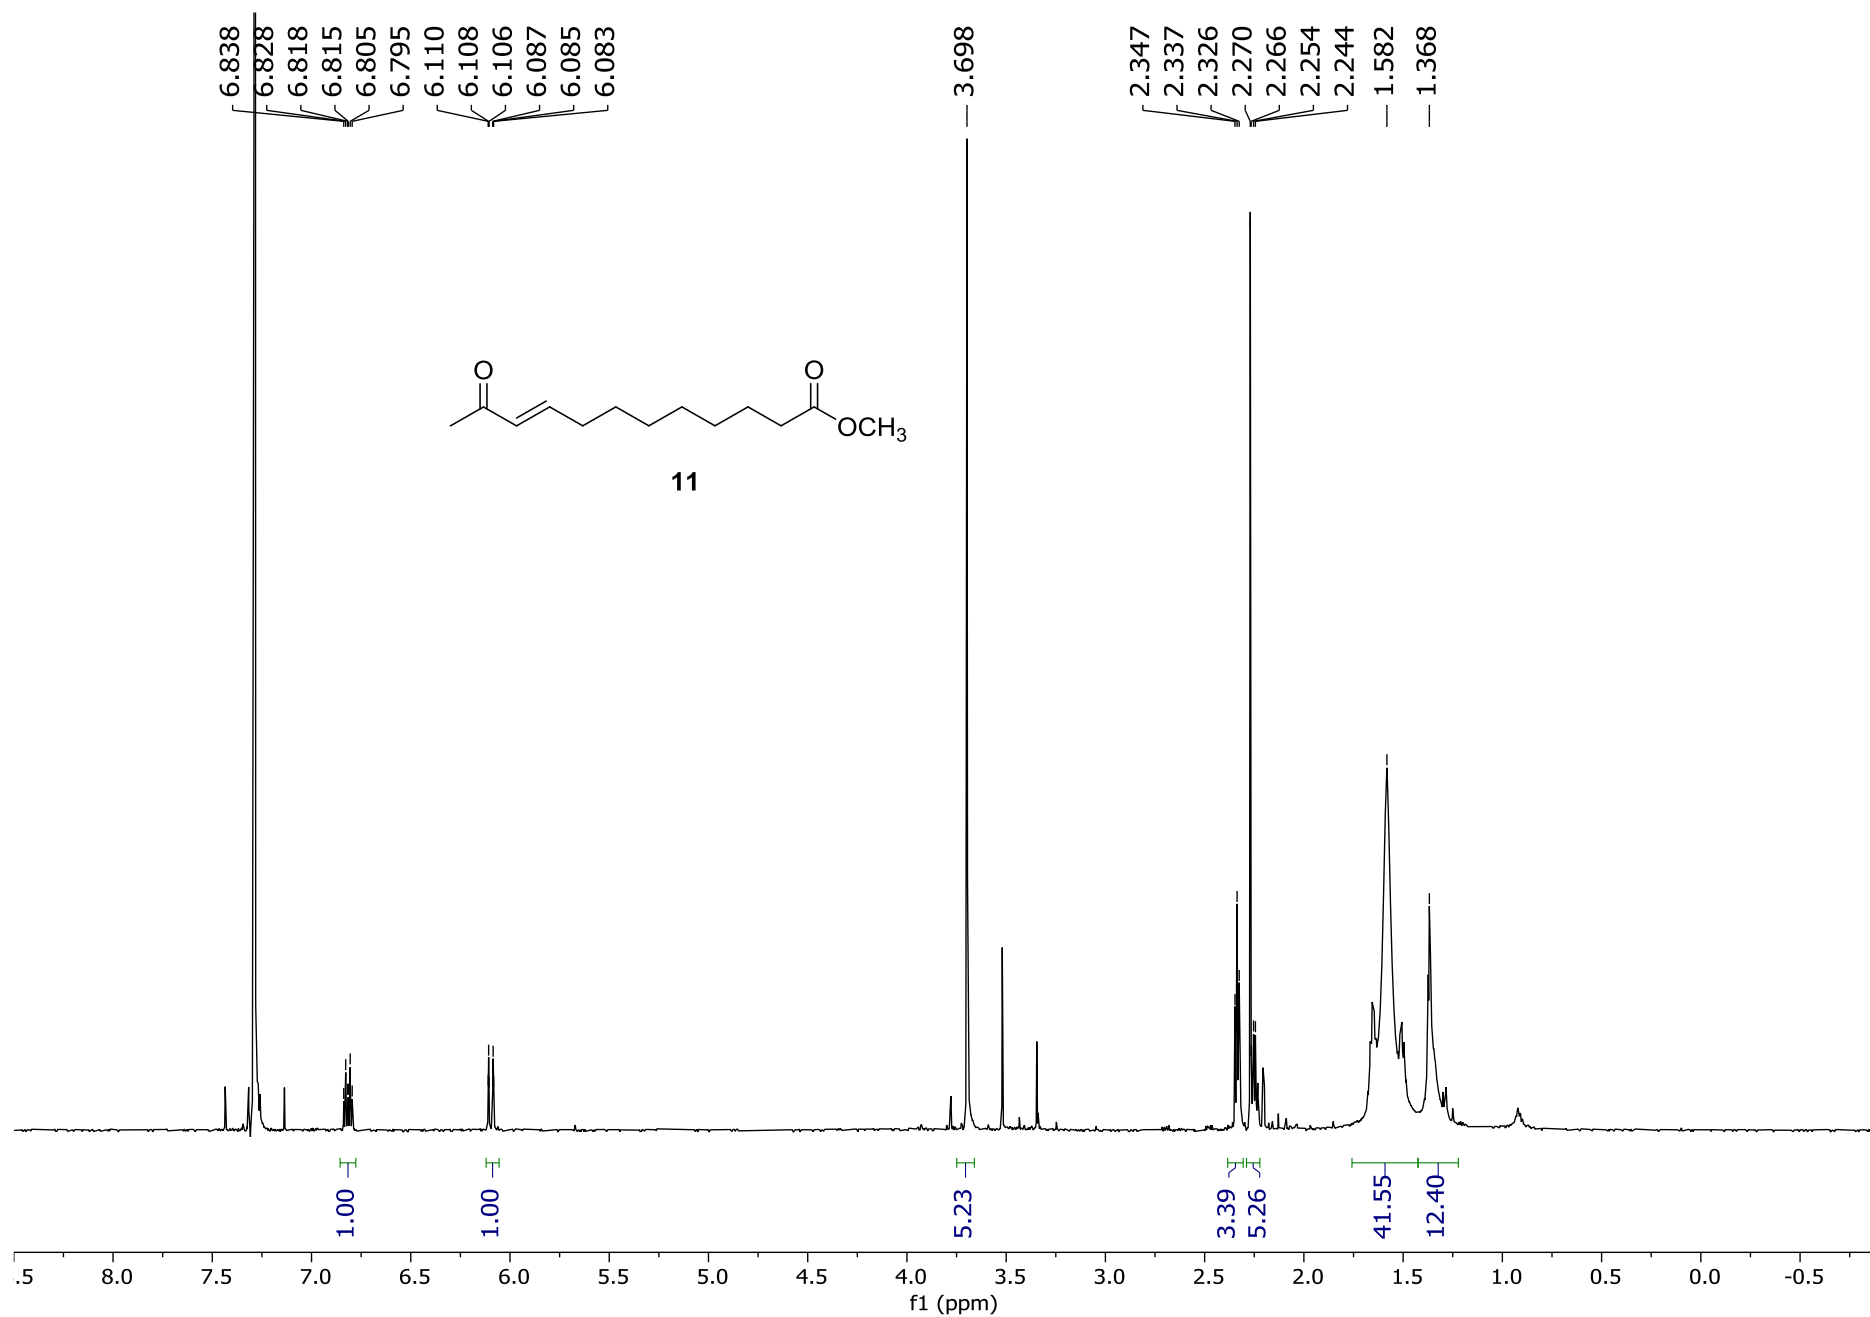

**Figure S22.**  $^{13}\text{C}$  NMR spectrum of **11** in chloroform-*d* (175 MHz)

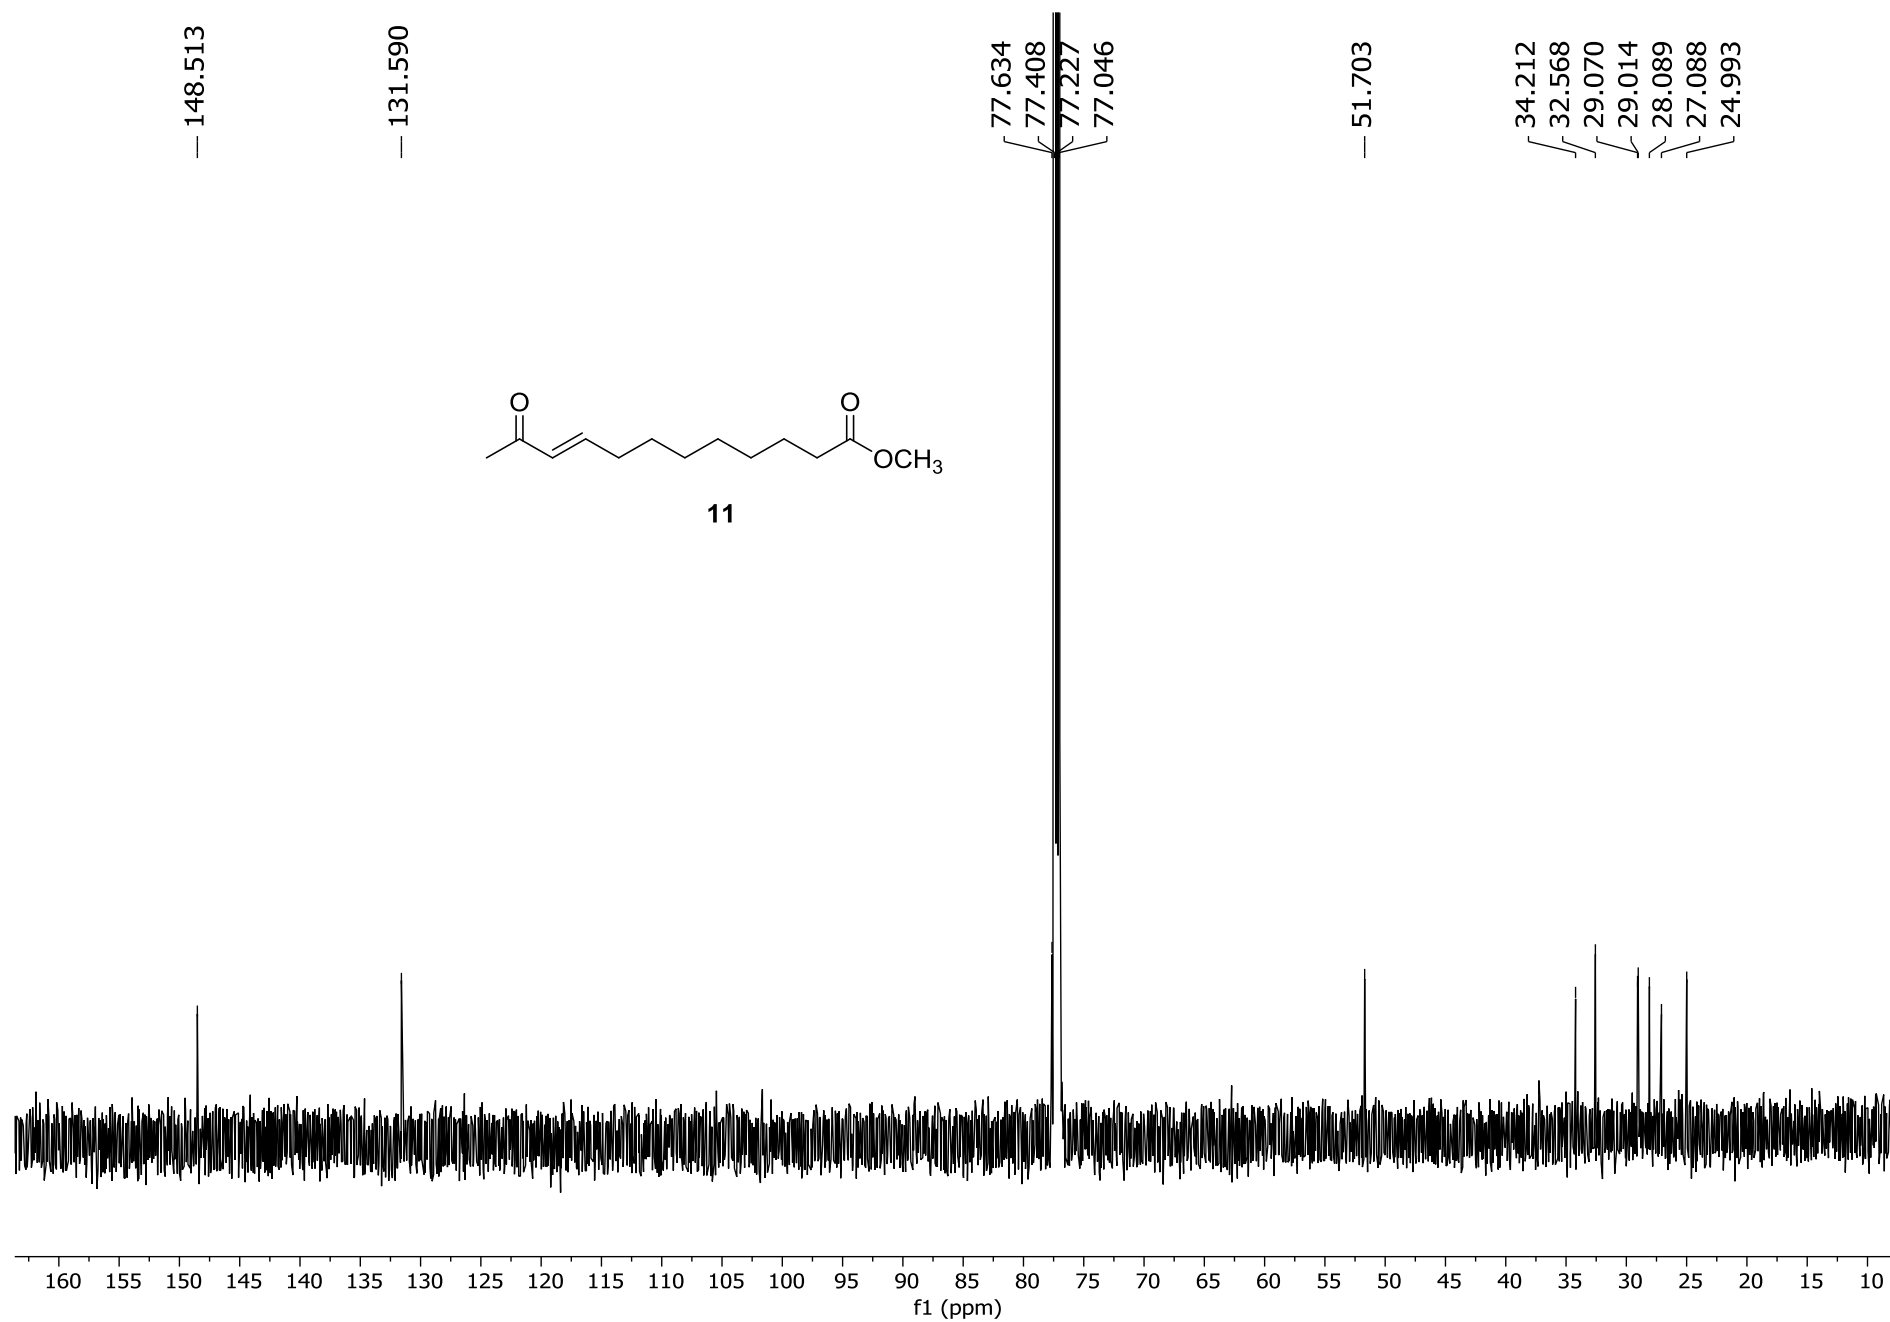



**Figure S23.**  $^1\text{H}$  NMR spectrum of **12** in chloroform-*d* (700 MHz)

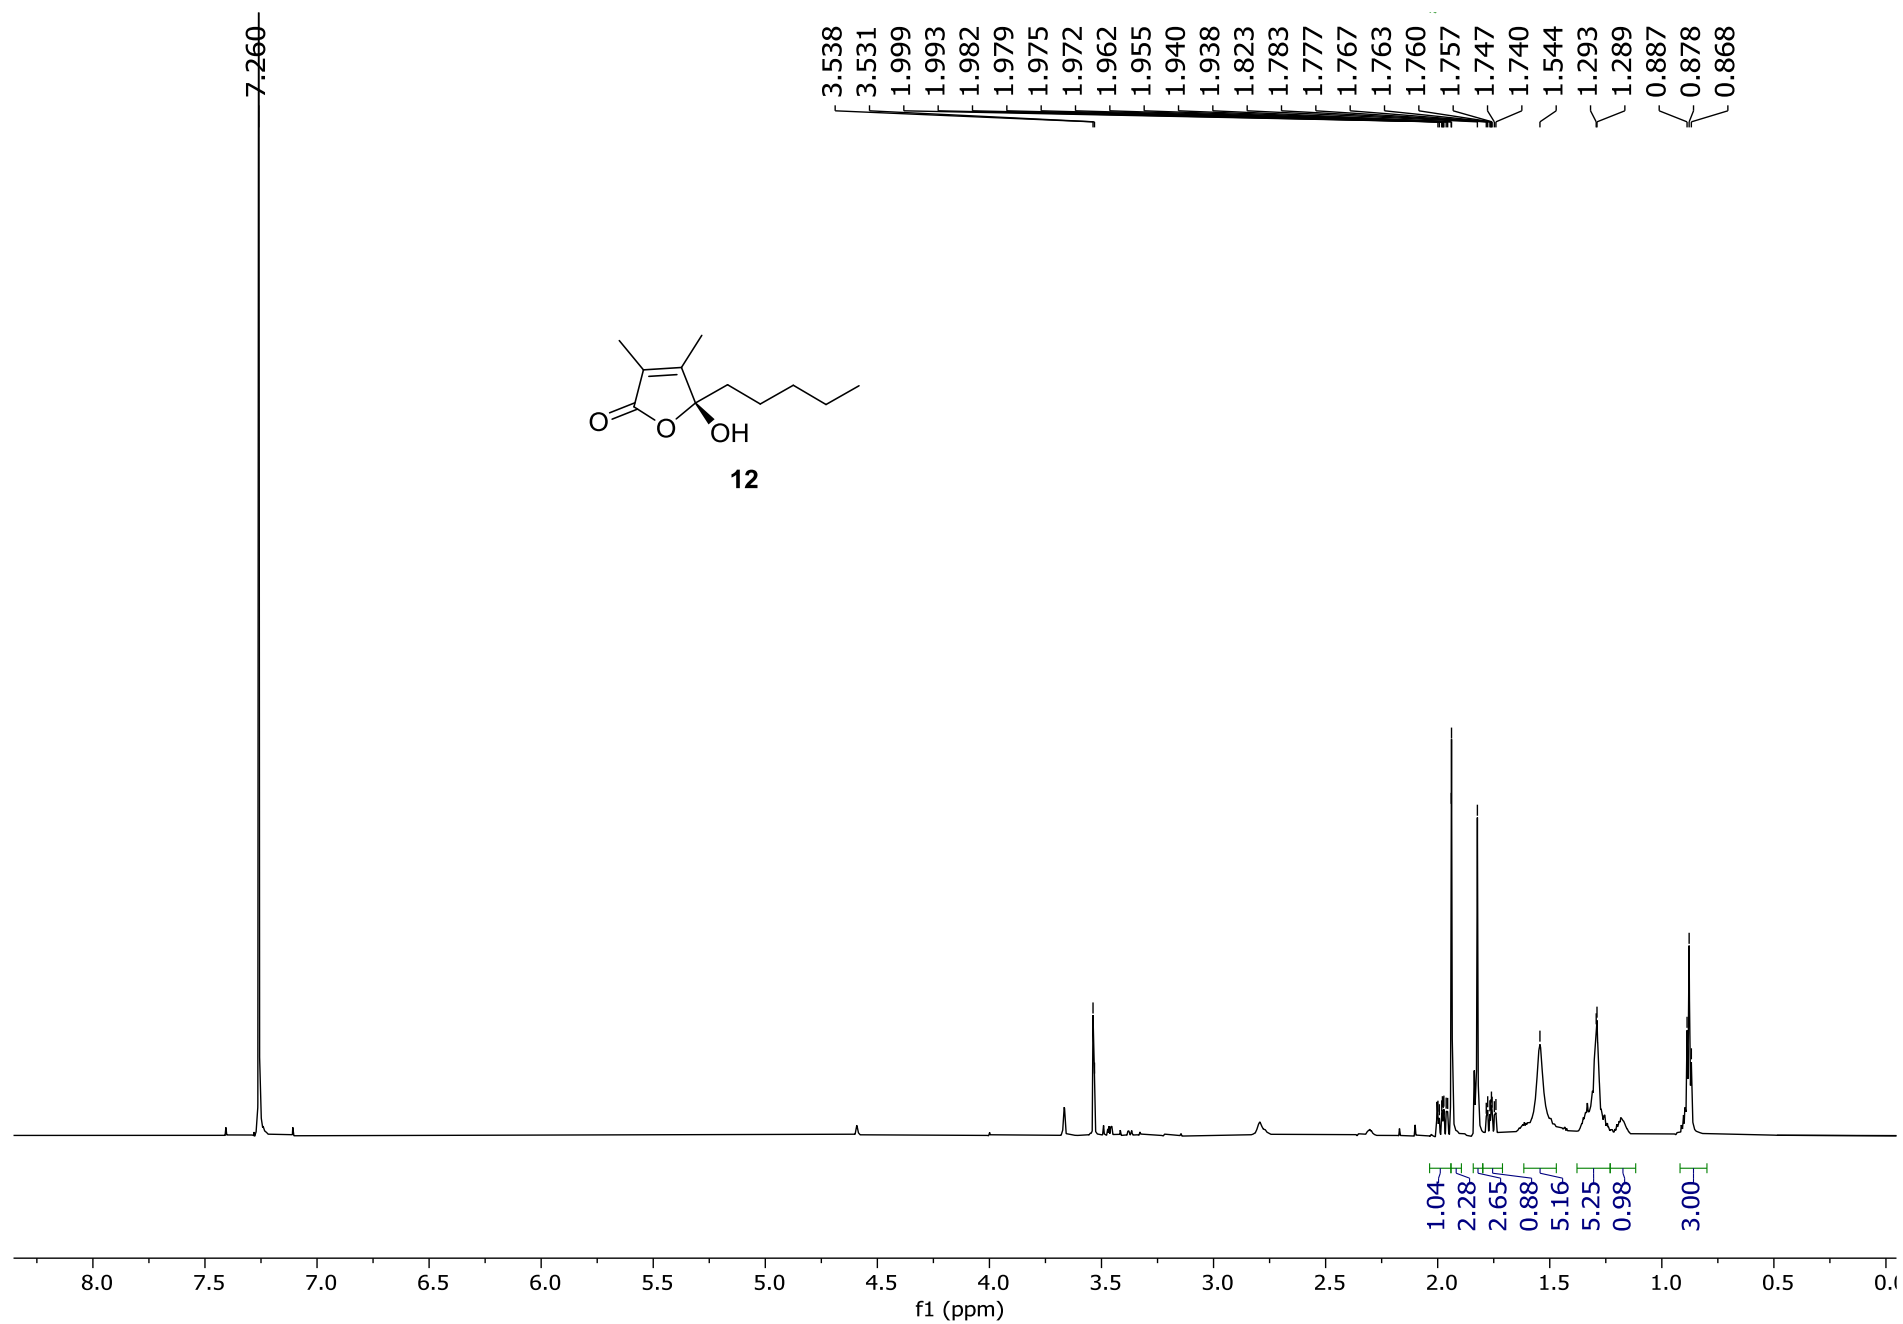

**Figure S24.**  $^{13}\text{C}$  NMR spectrum of **12** in chloroform-*d* (175 MHz)

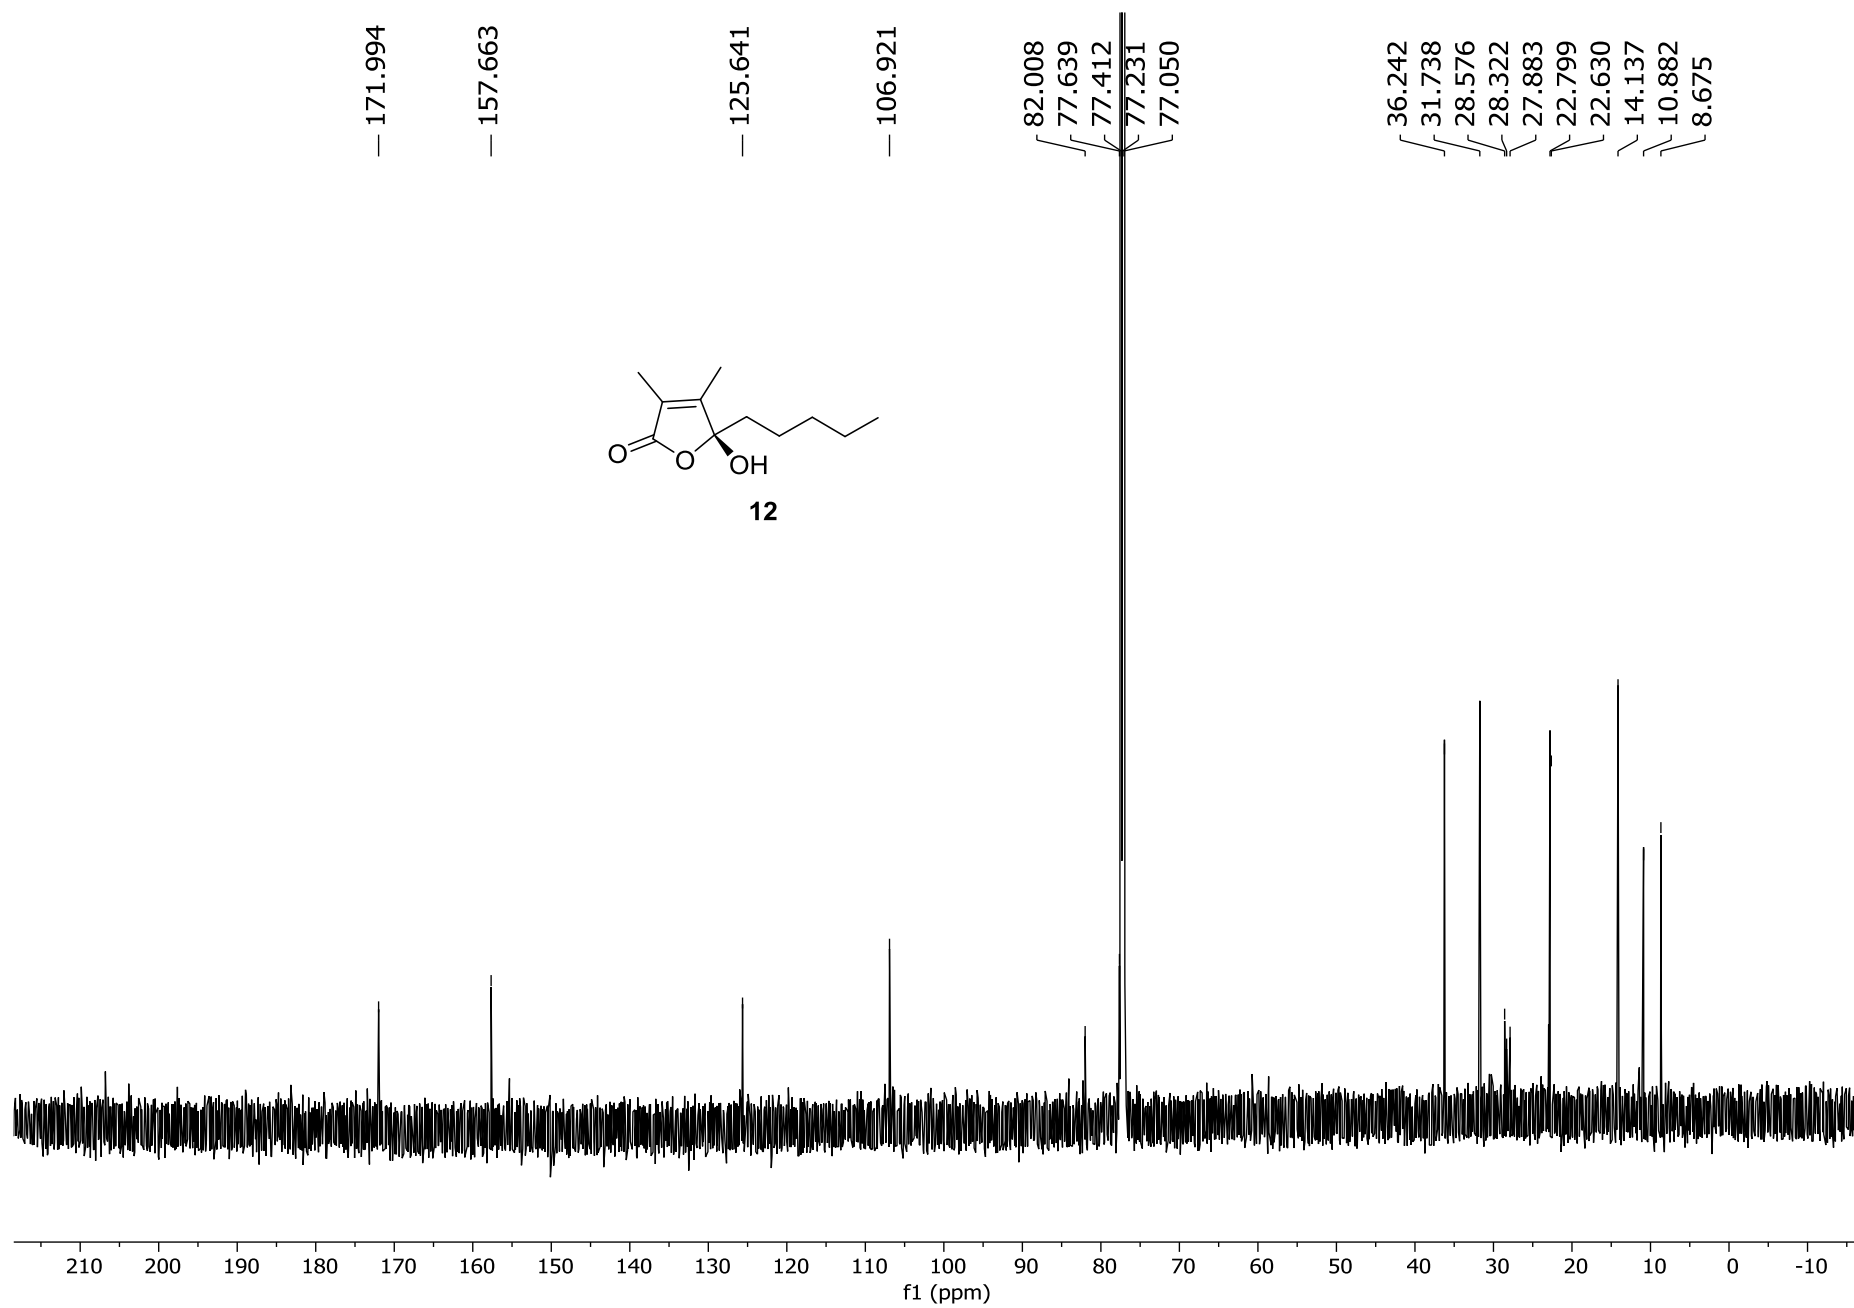

**Figure S25.**  $^1\text{H}$  NMR spectrum of **13** in chloroform-*d* (700 MHz)

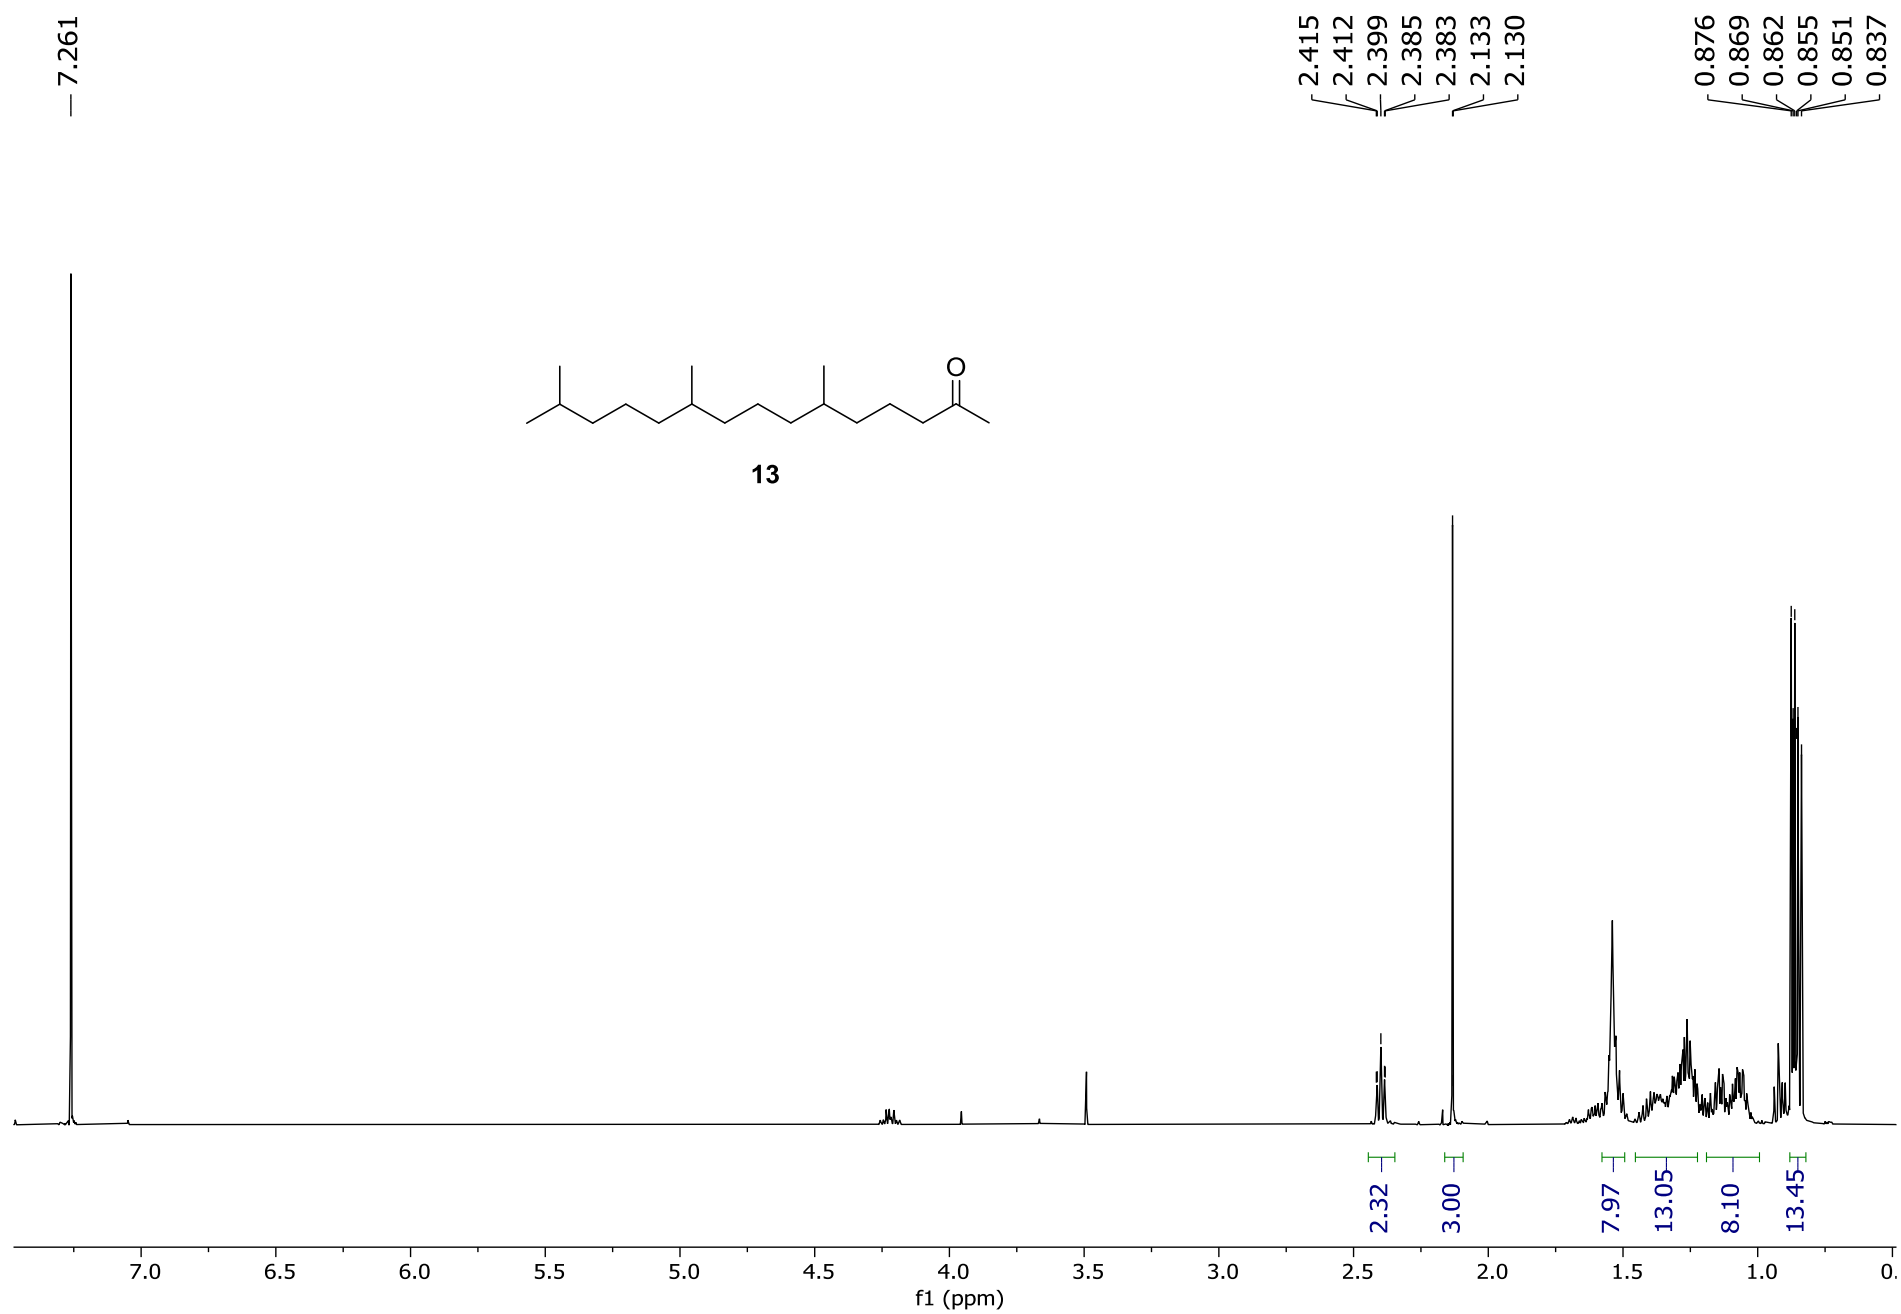

**Figure S26.**  $^1\text{H}$  NMR spectrum of **14** in methanol- $d_4$  (700 MHz)

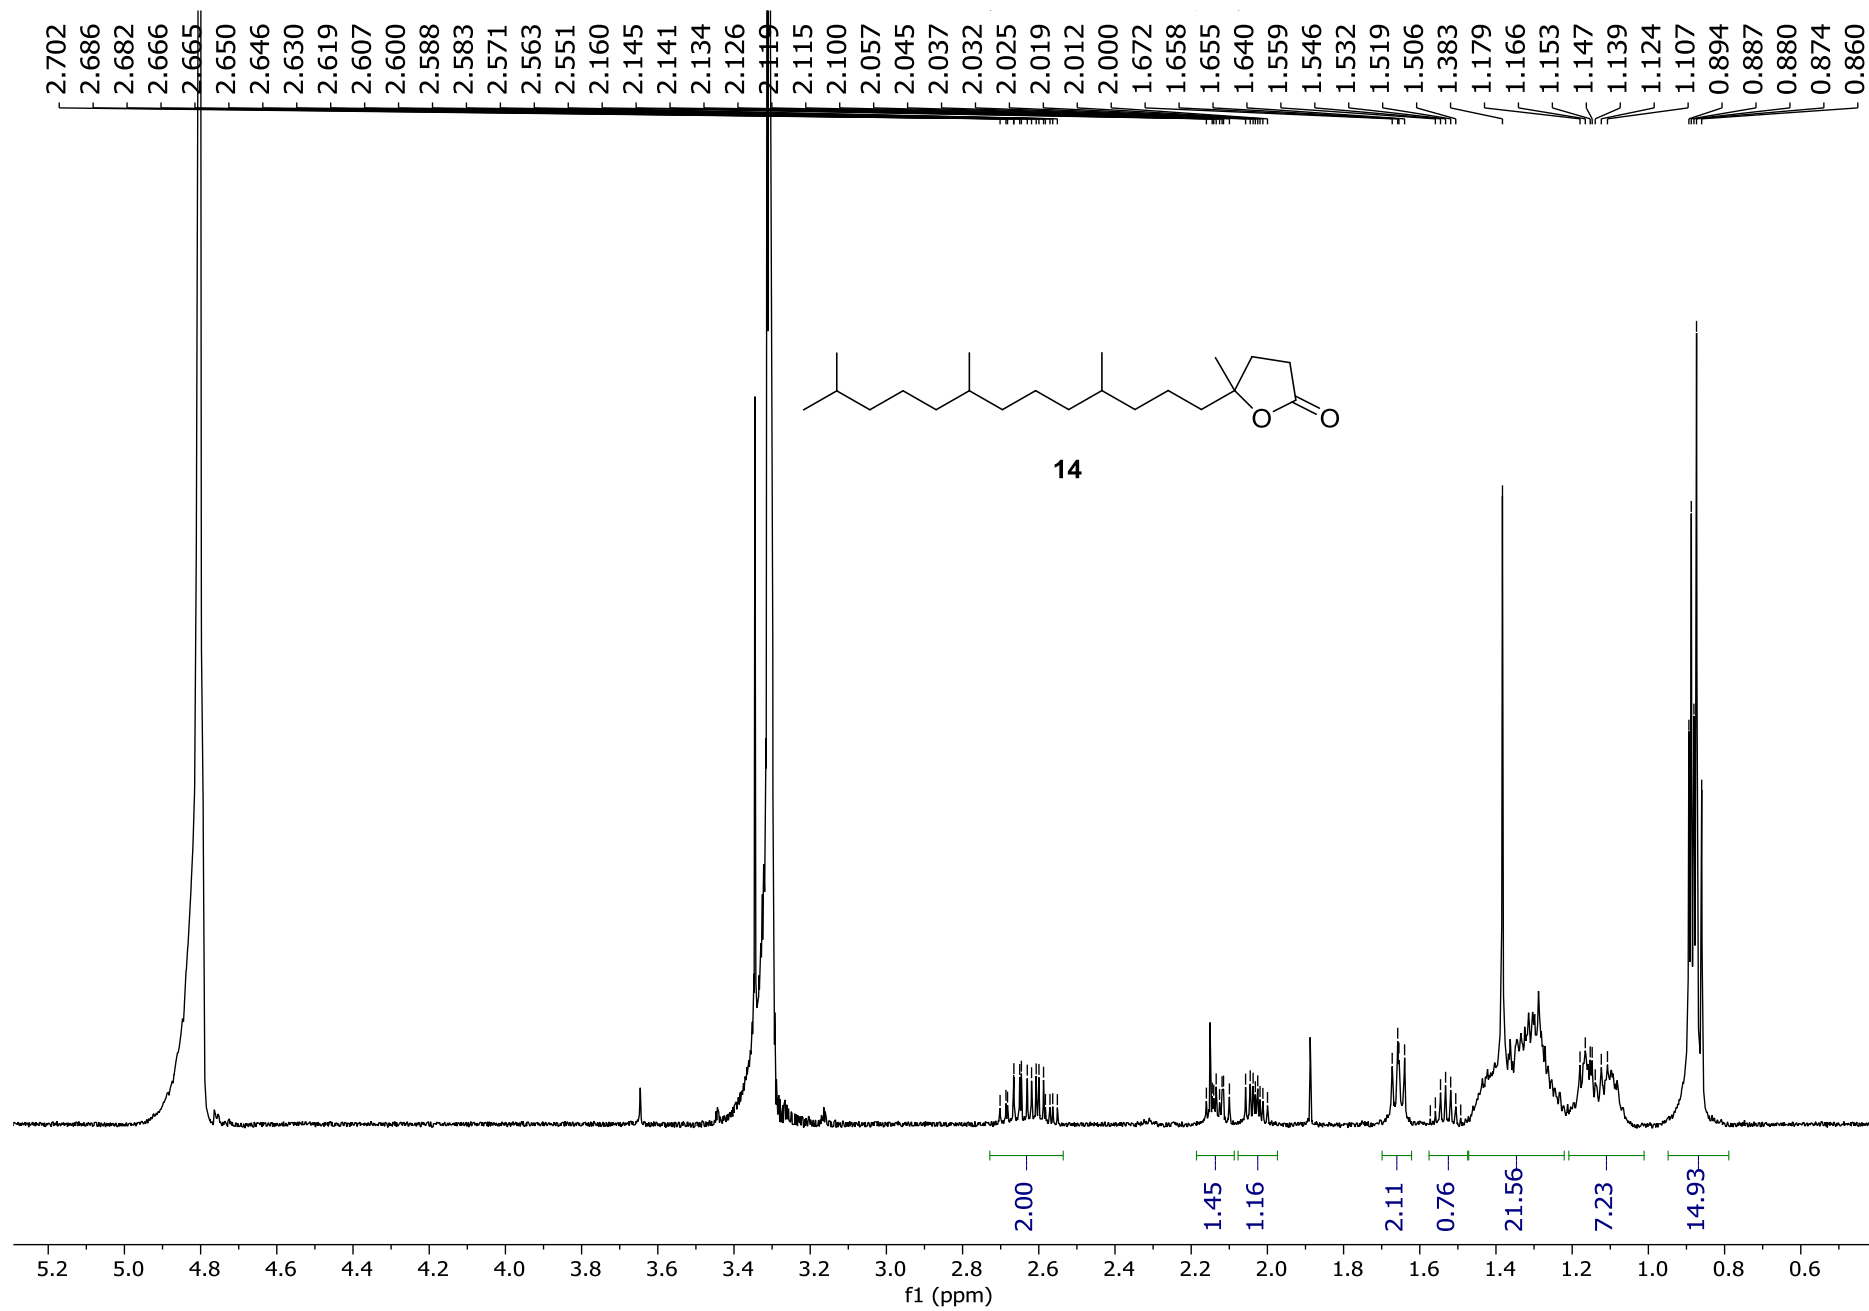

**Figure S27.**  $^{13}\text{C}$  NMR spectrum of **14** in methanol- $d_4$  (175 MHz)

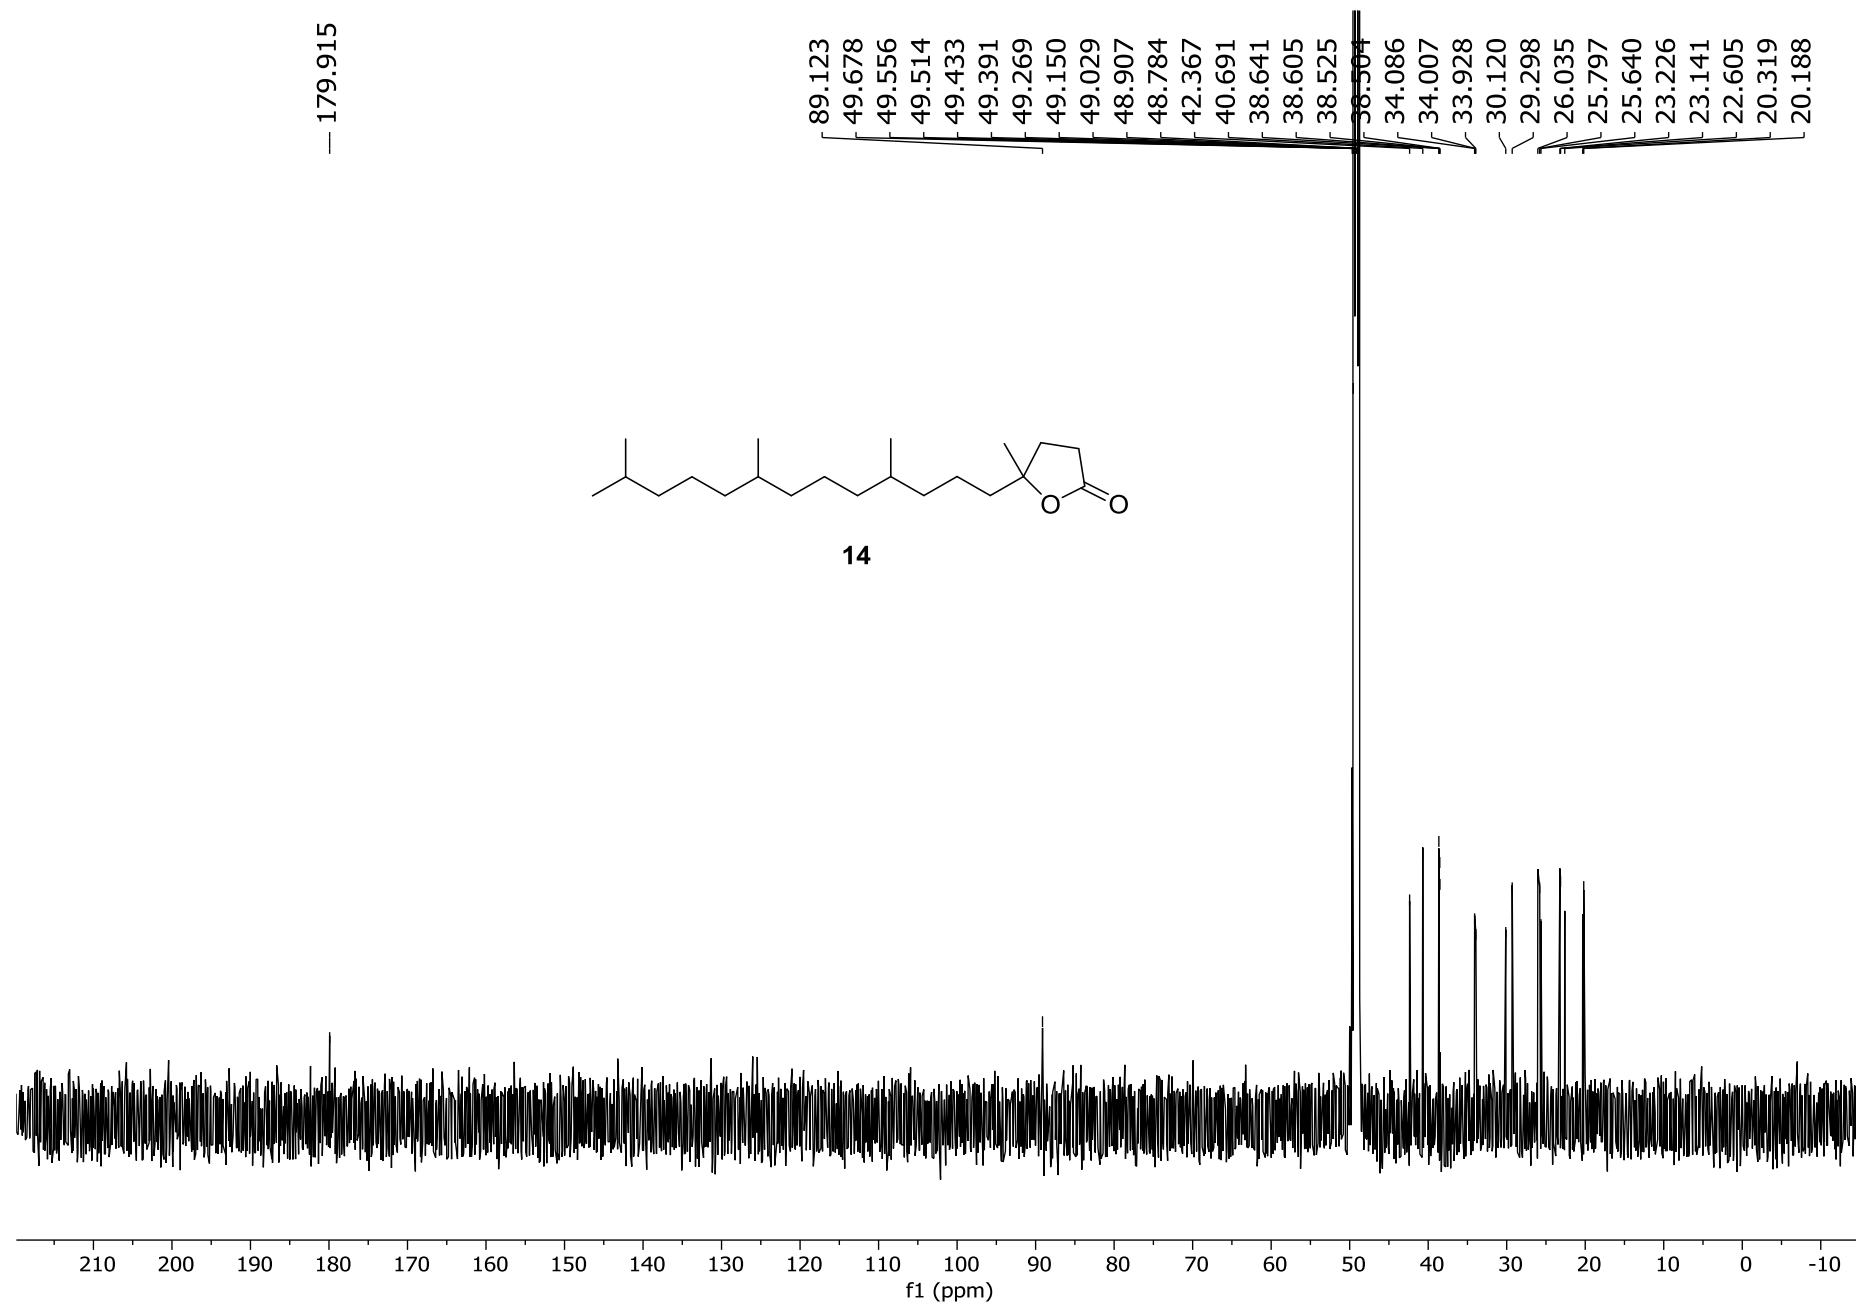

**Figure S28.**  $^1\text{H}$  NMR spectrum of **15** in chloroform-*d* (700 MHz)

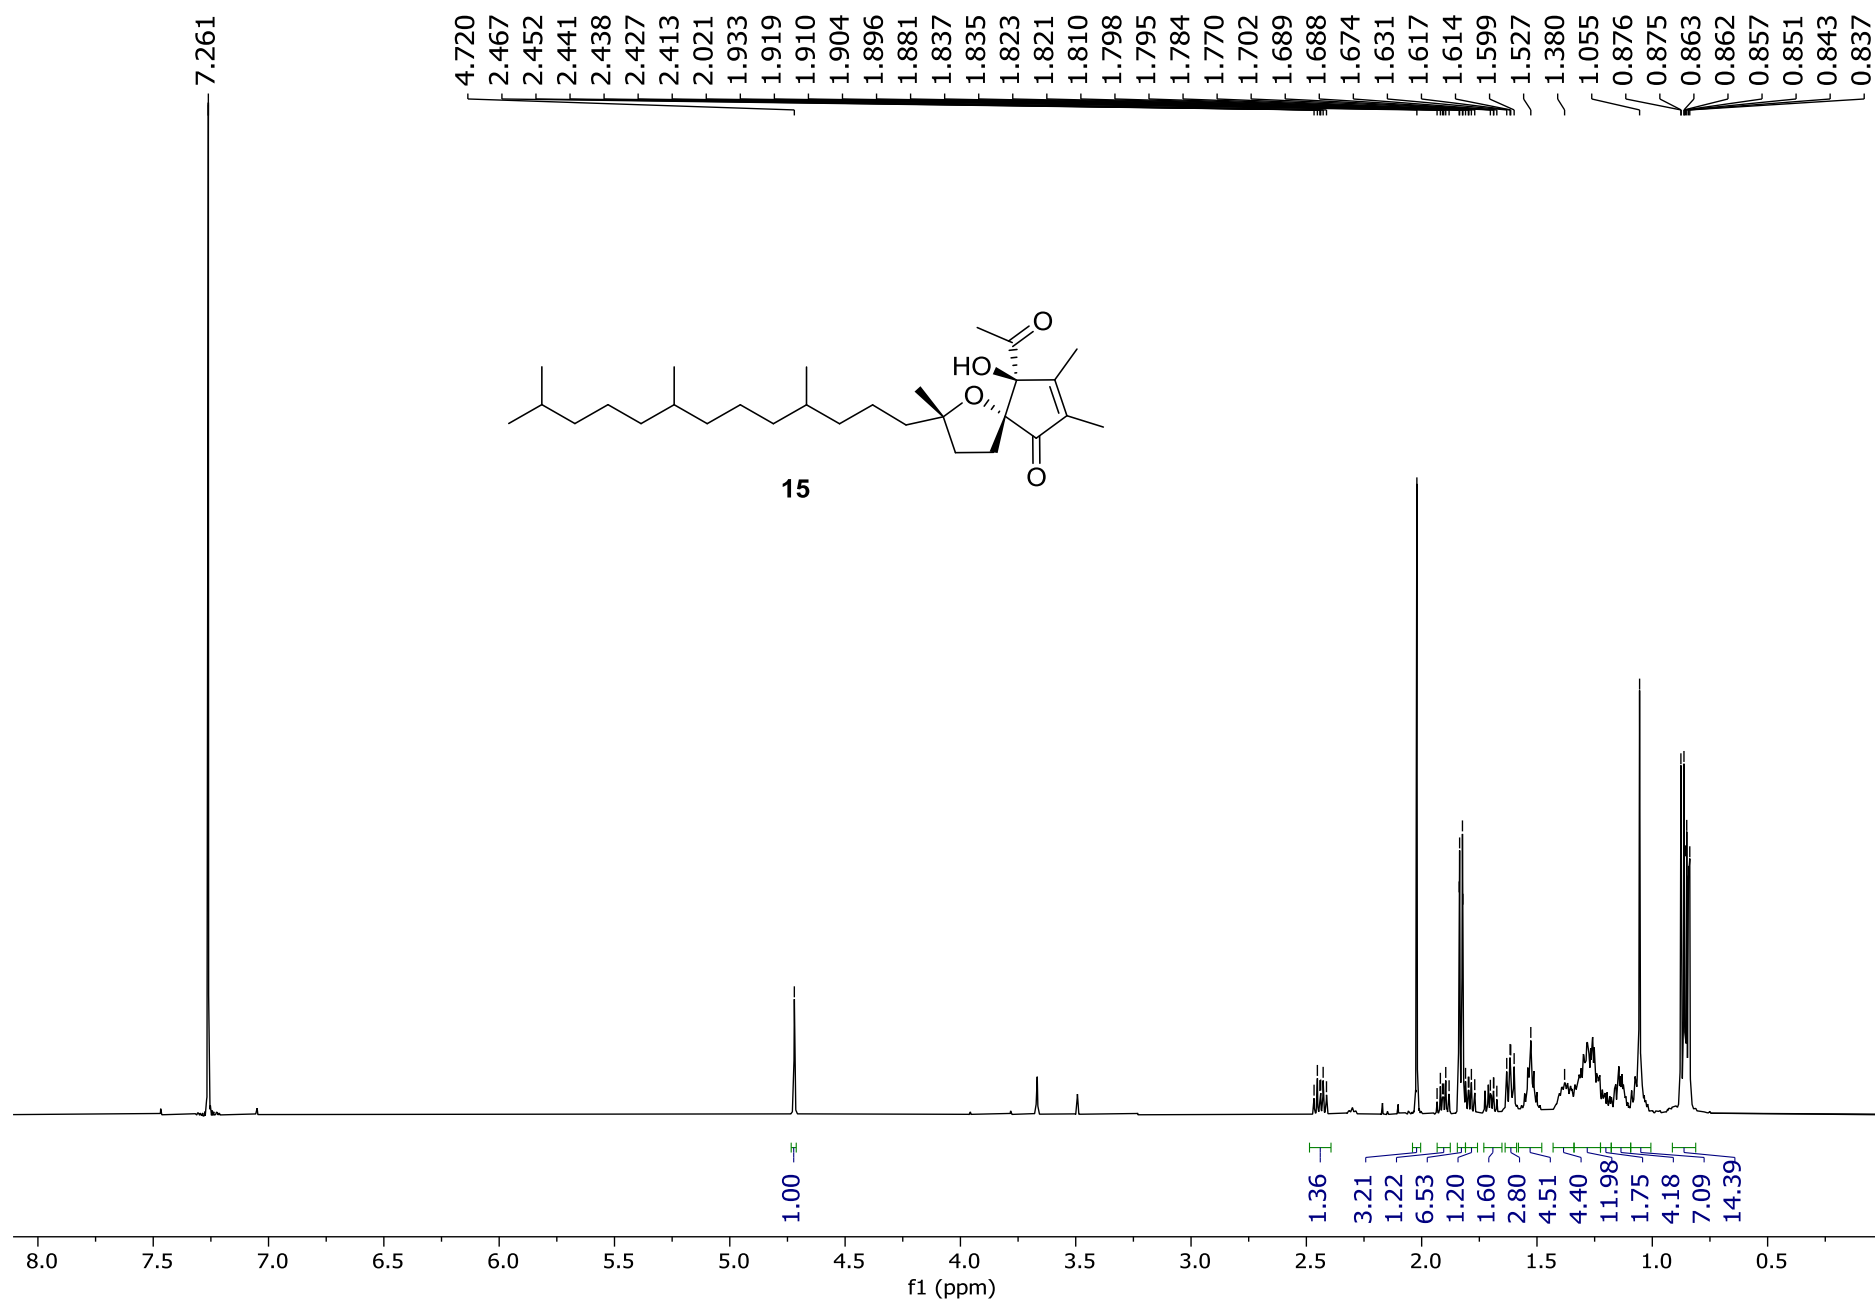

**Figure S29.**  $^{13}\text{C}$  NMR spectrum of **15** in chloroform-*d* (175 MHz)

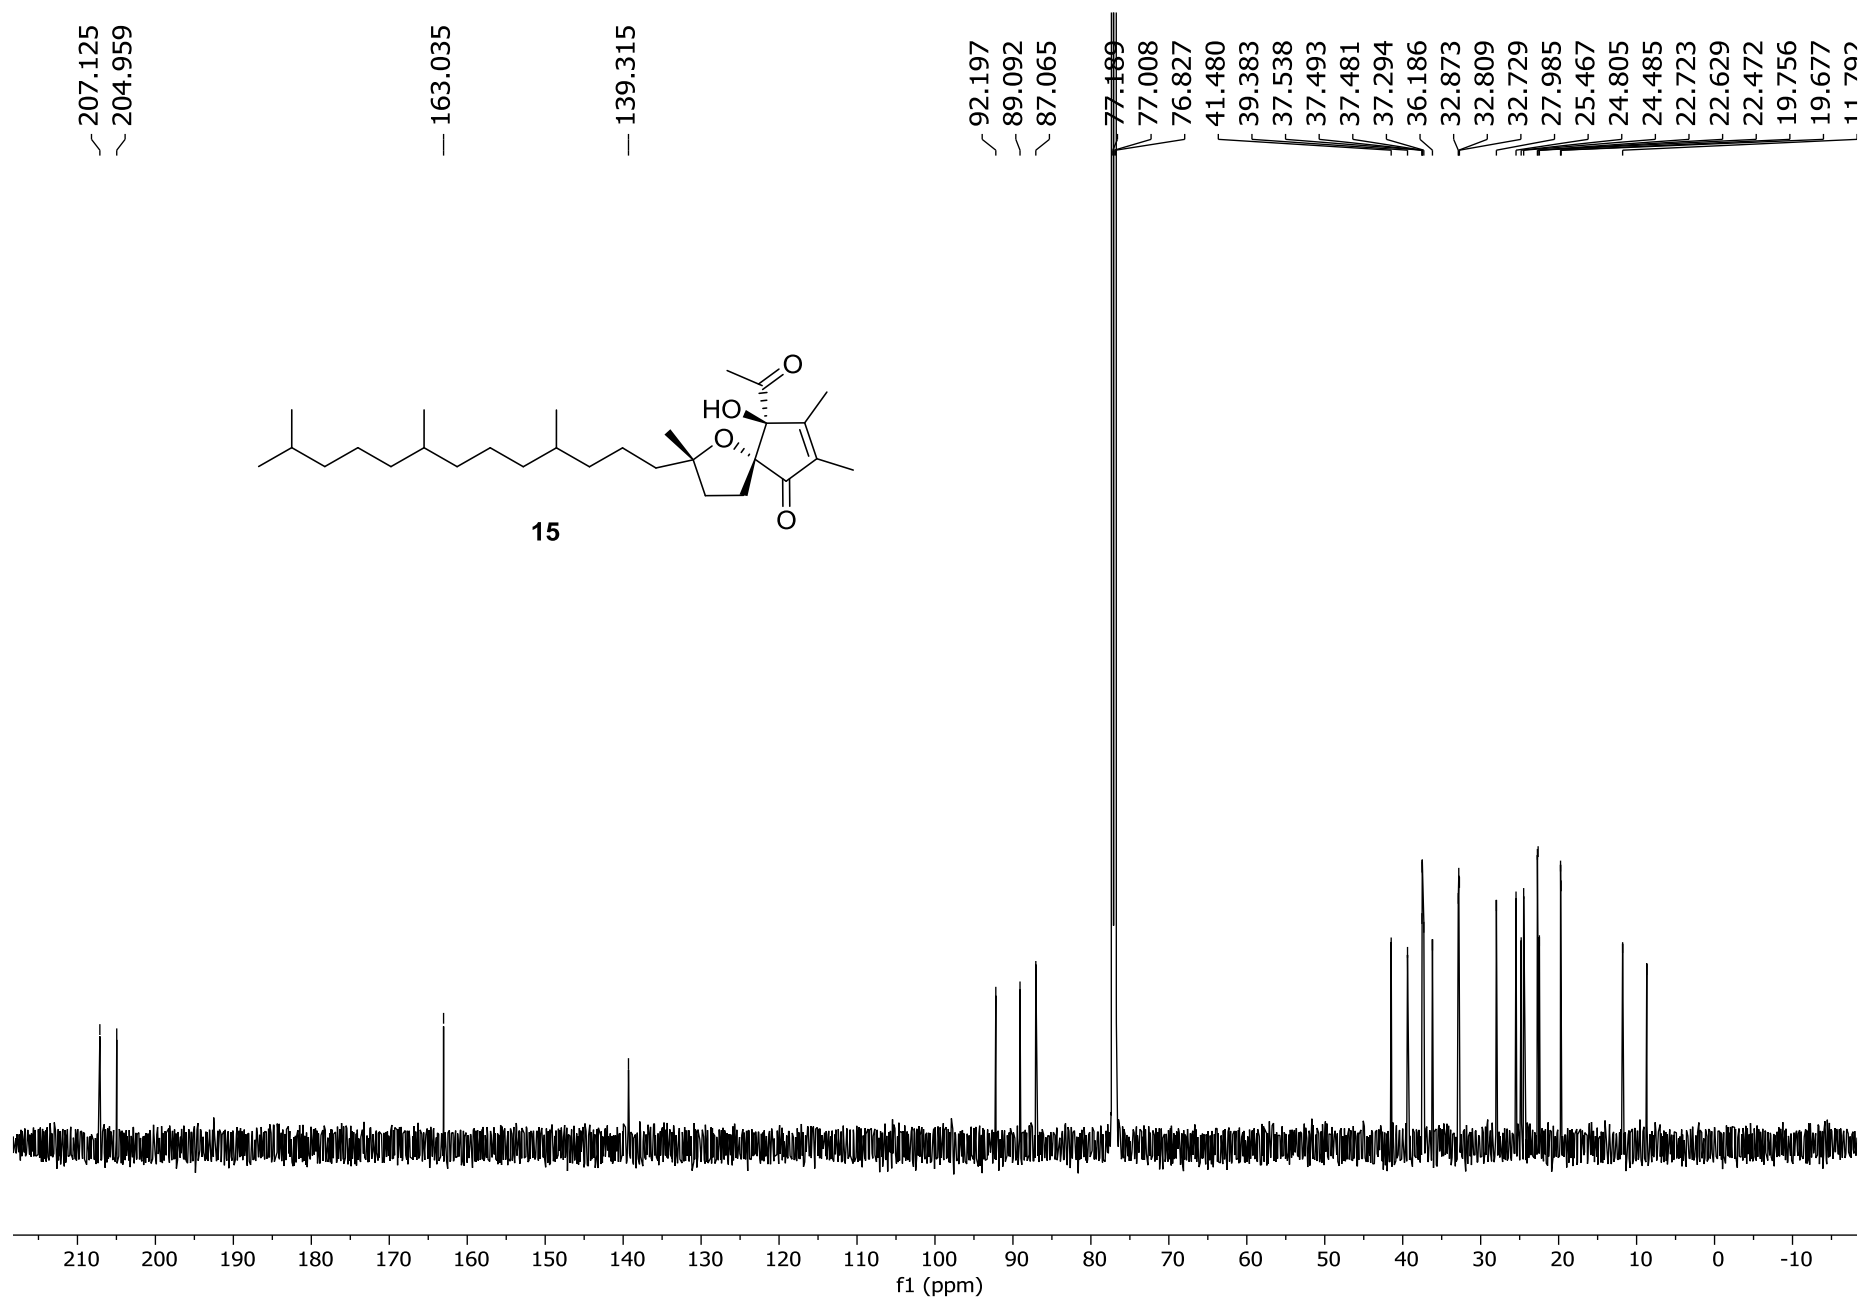

**Figure S30.**  $^1\text{H}$  NMR spectrum of **16** in chloroform- $d$  (700 MHz)

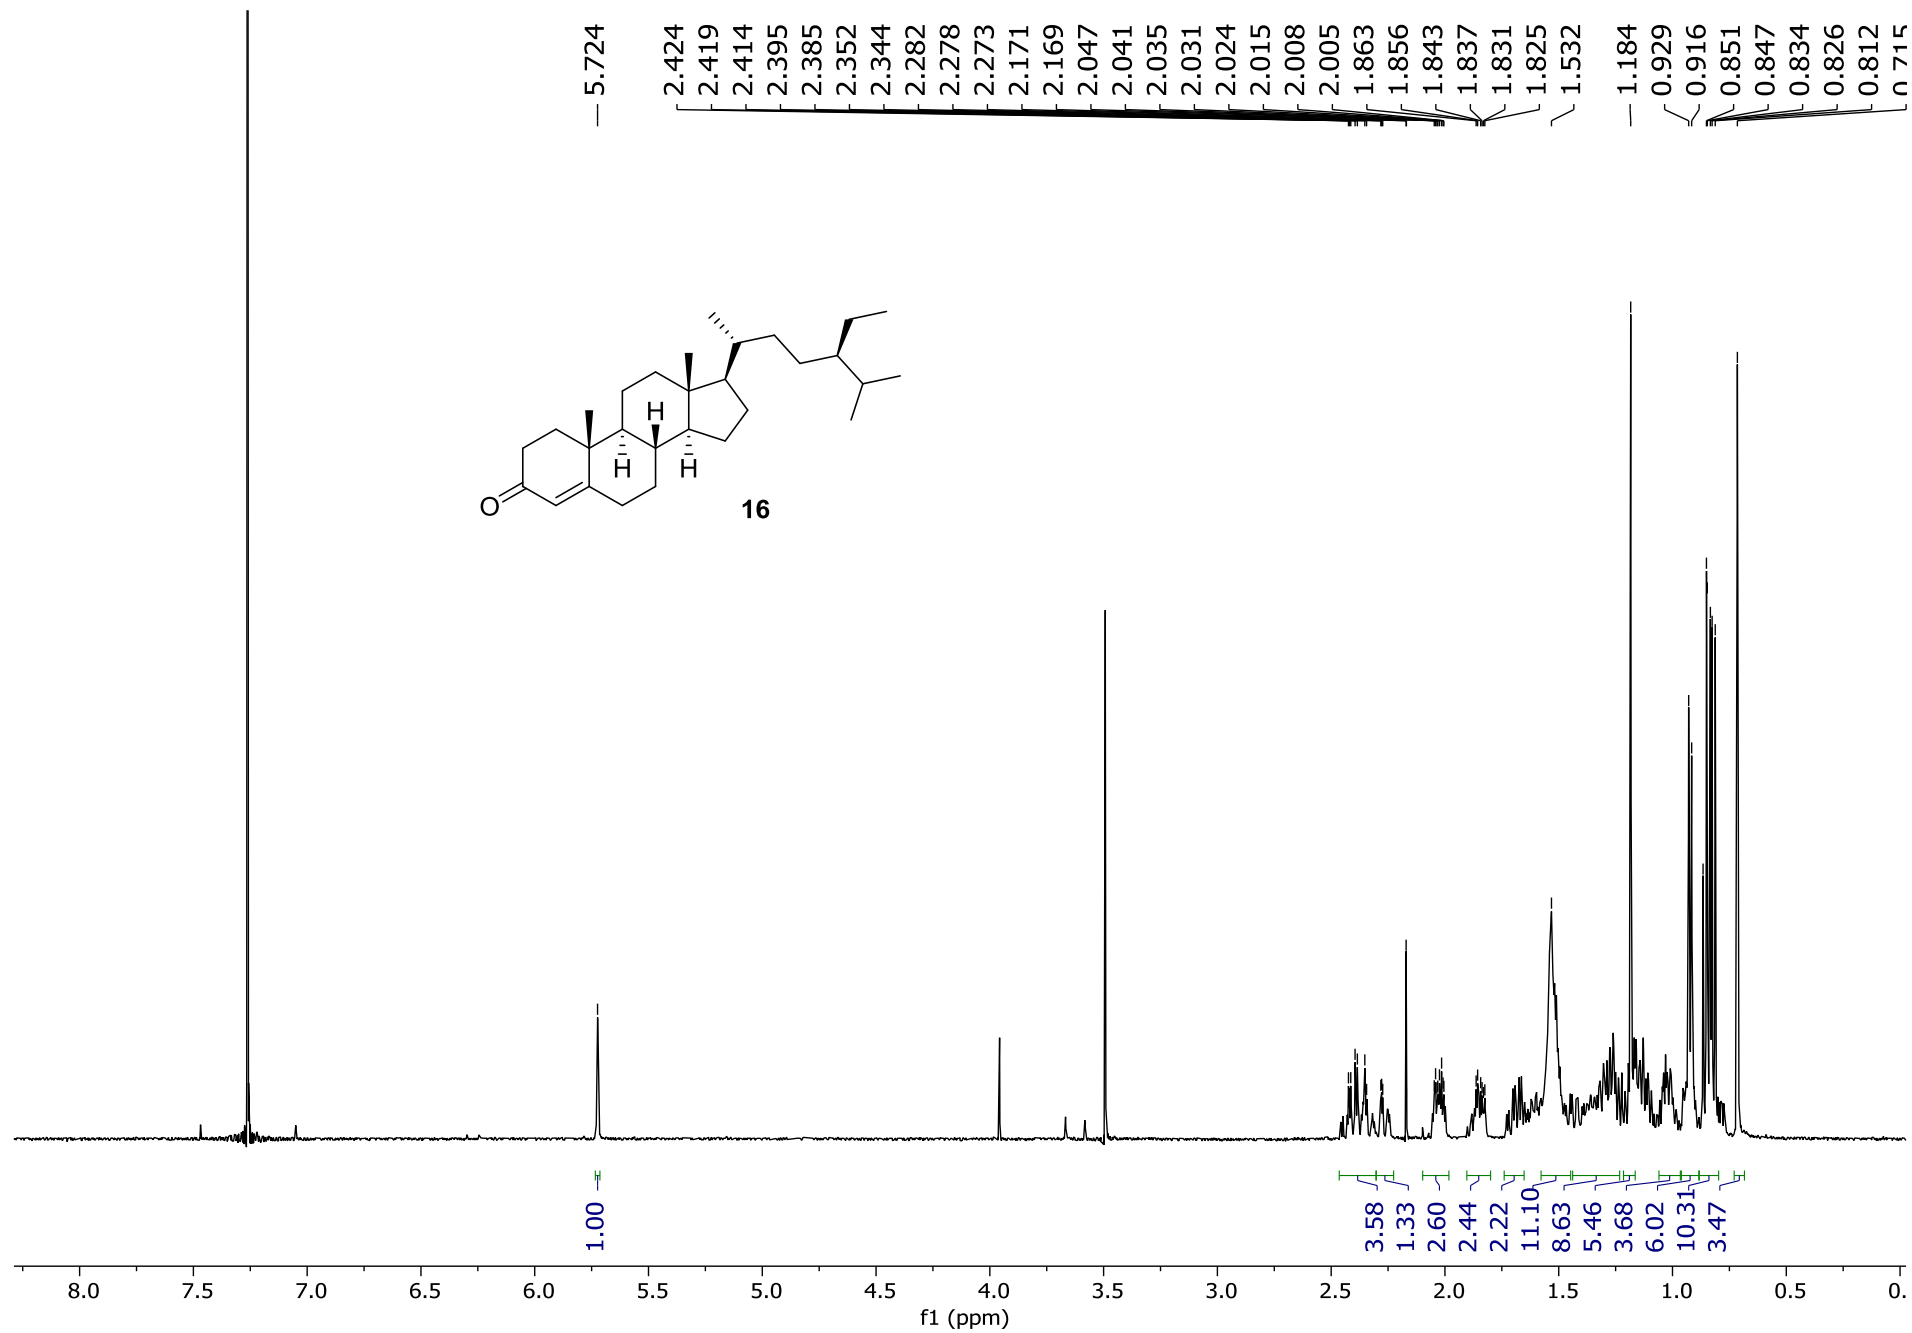



**Figure S31.**  $^{13}\text{C}$  NMR spectrum of **16** in chloroform-*d* (175 MHz)

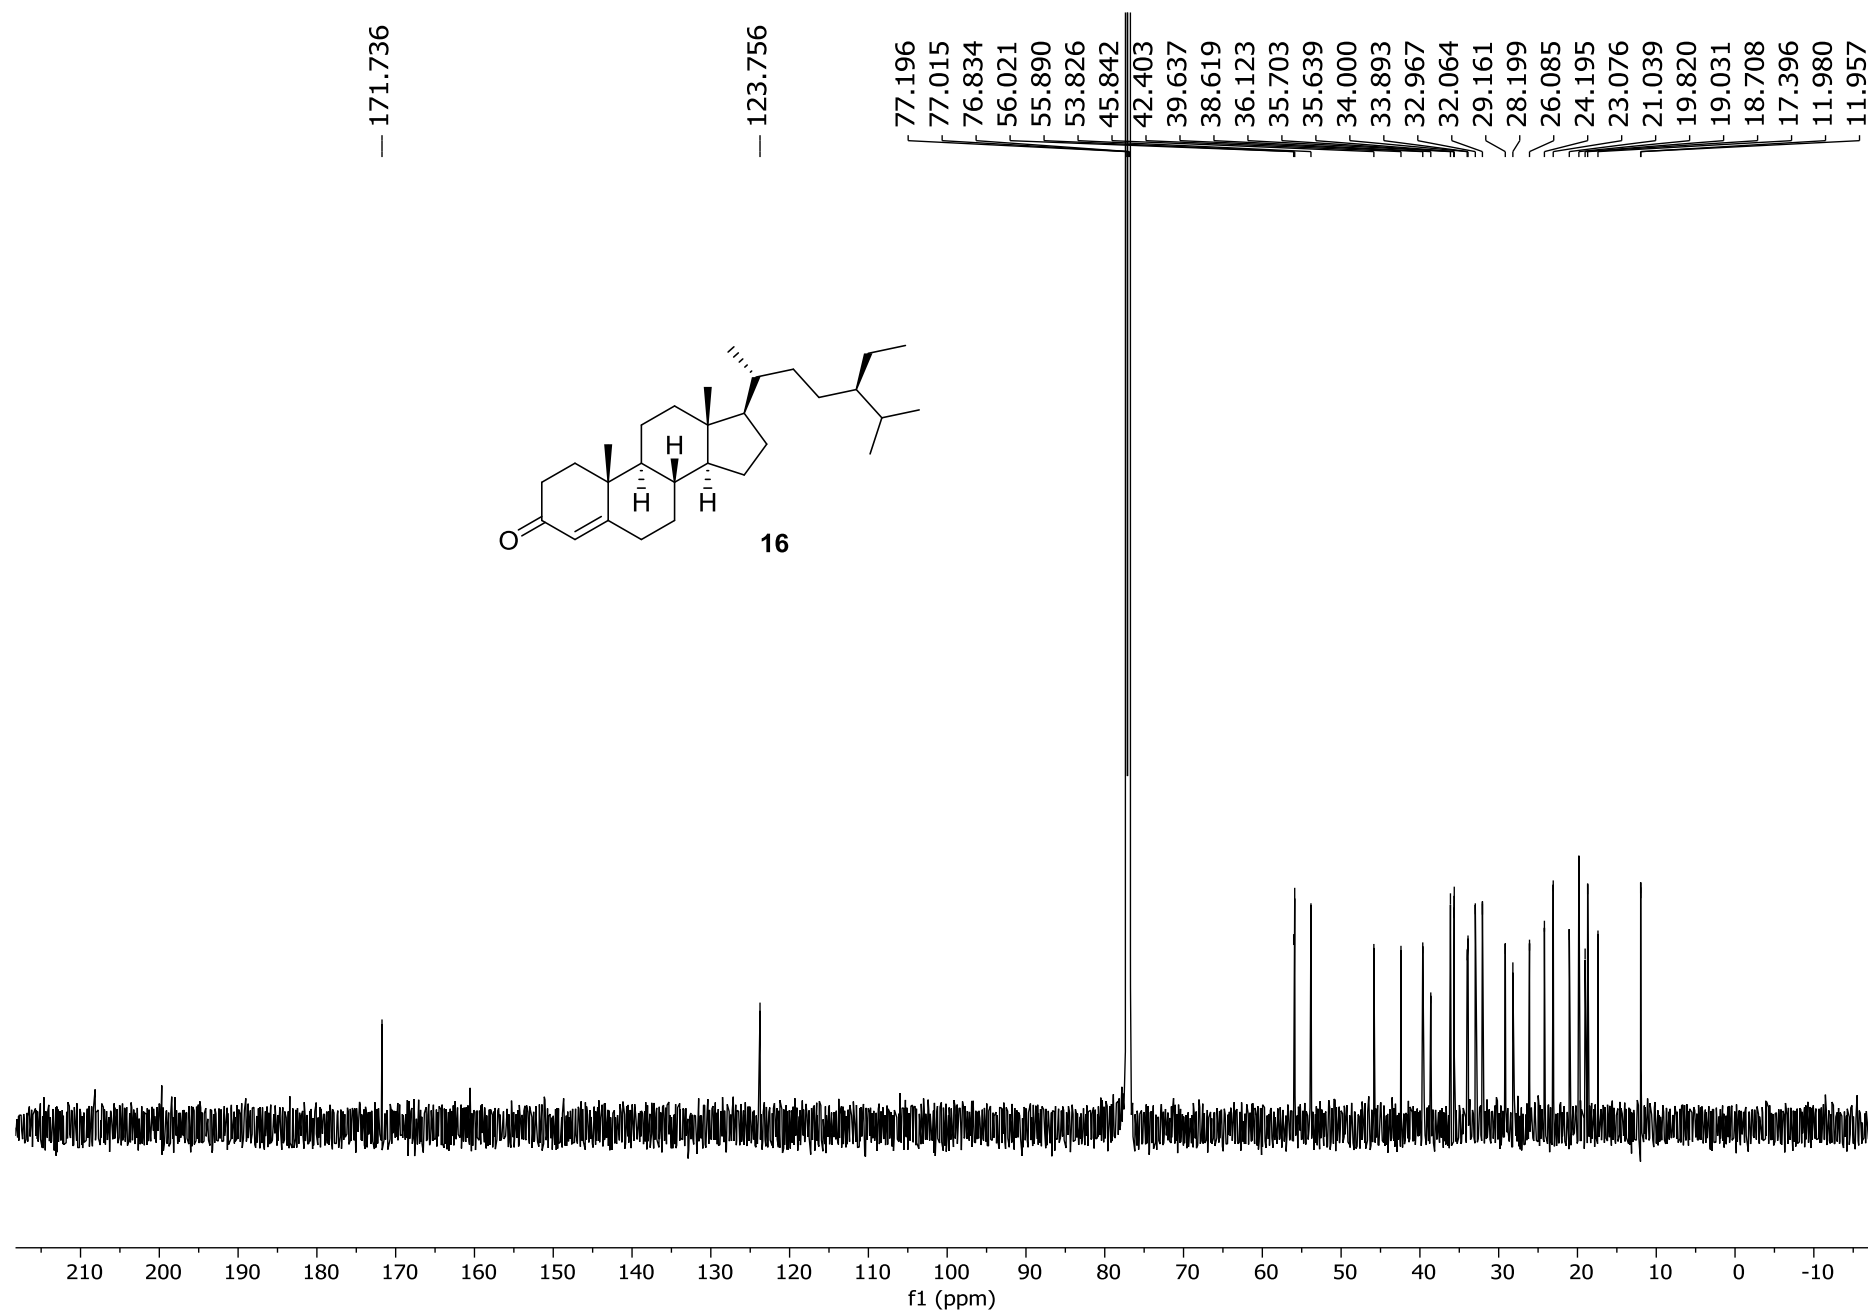

**Figure S32.**  $^1\text{H}$  NMR spectrum of **17** in chloroform- $d$  (700 MHz)

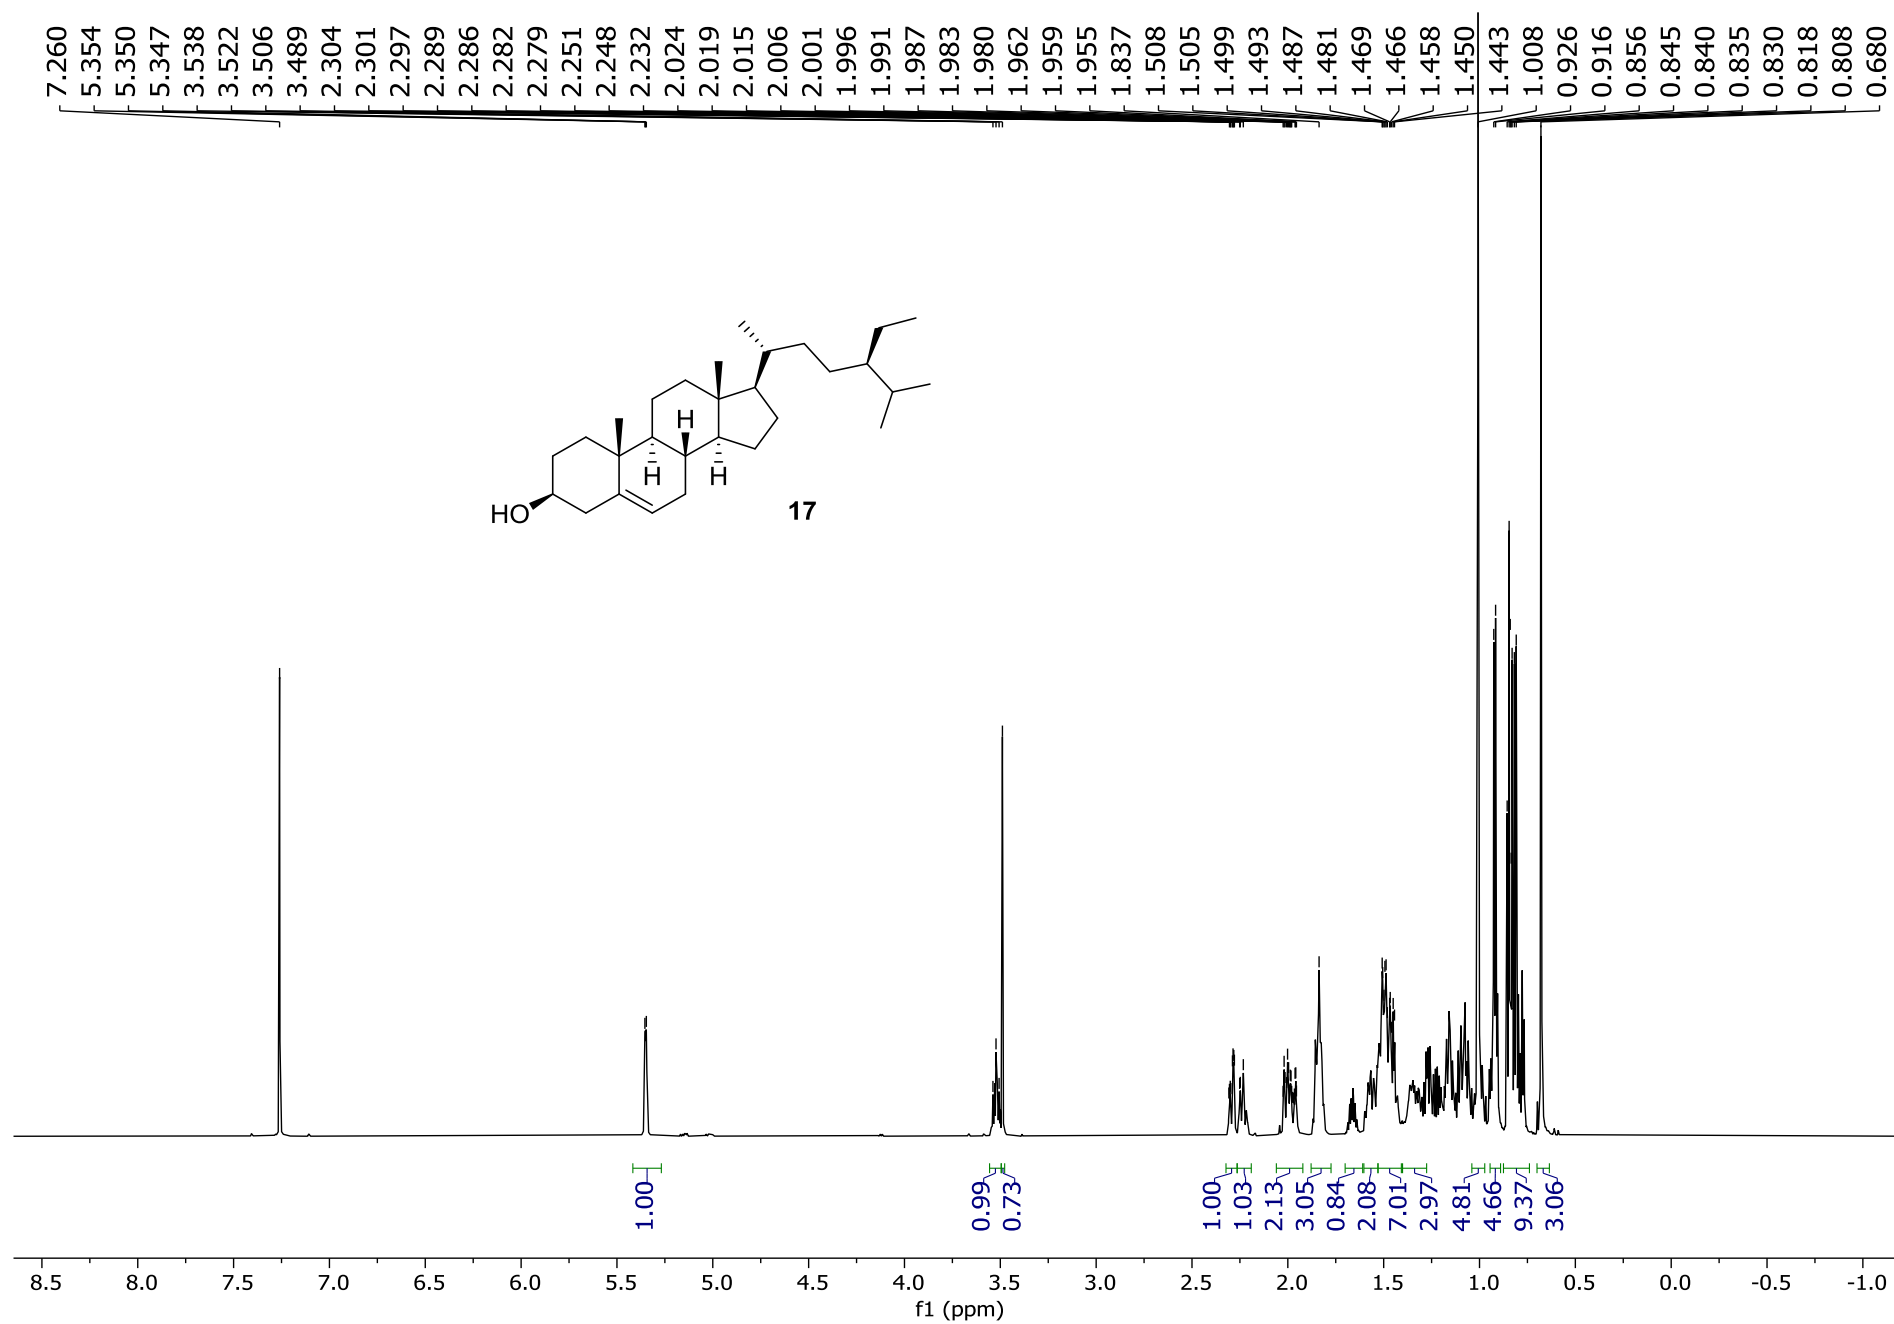

**Figure S33.**  $^{13}\text{C}$  NMR spectrum of **17** in chloroform-*d* (175 MHz)

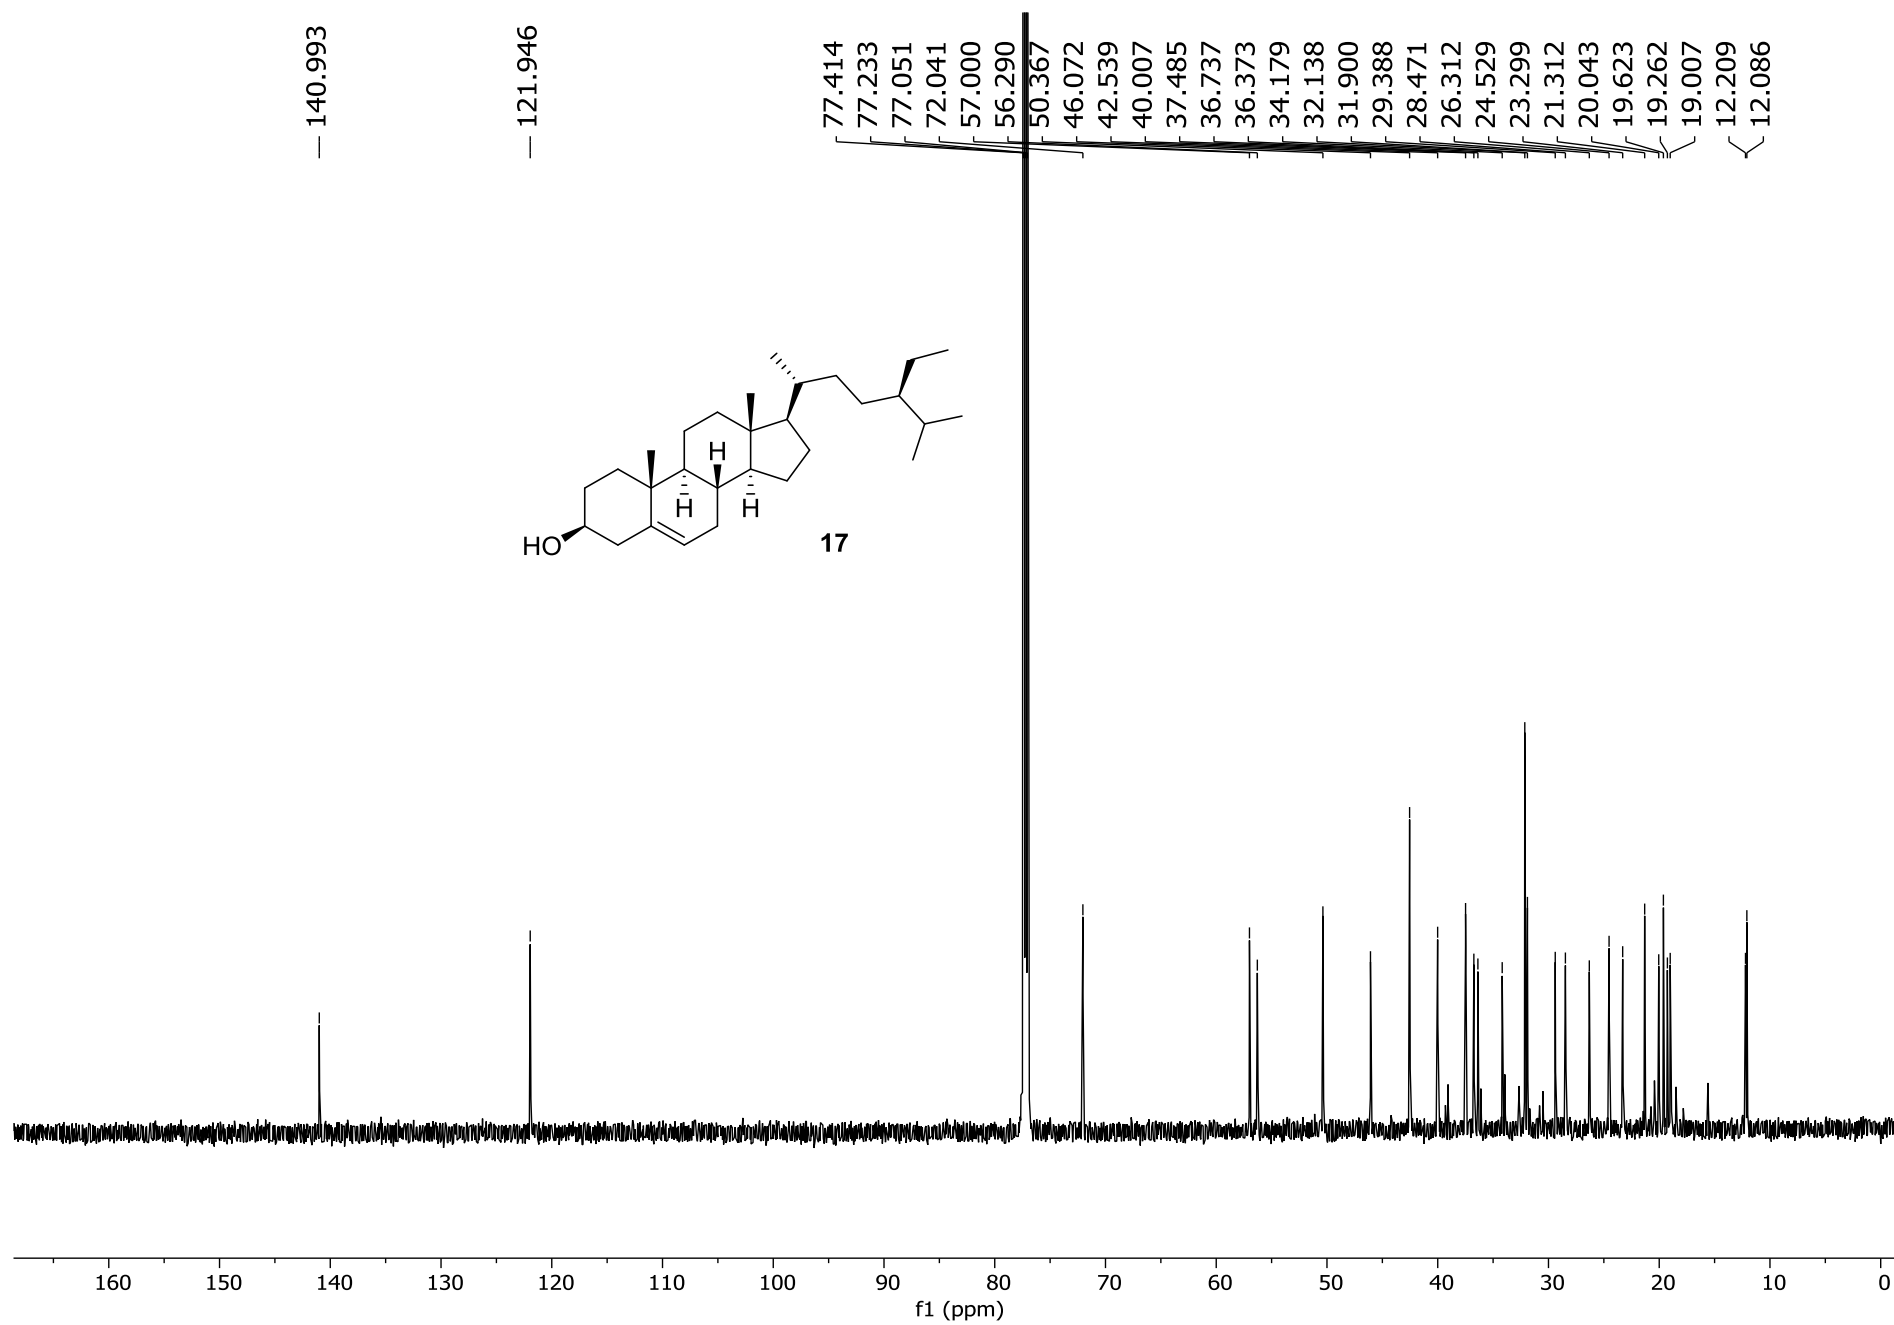

**Figure S34.**  $^1\text{H}$  NMR spectrum of **18** in chloroform- $d$  (700 MHz)

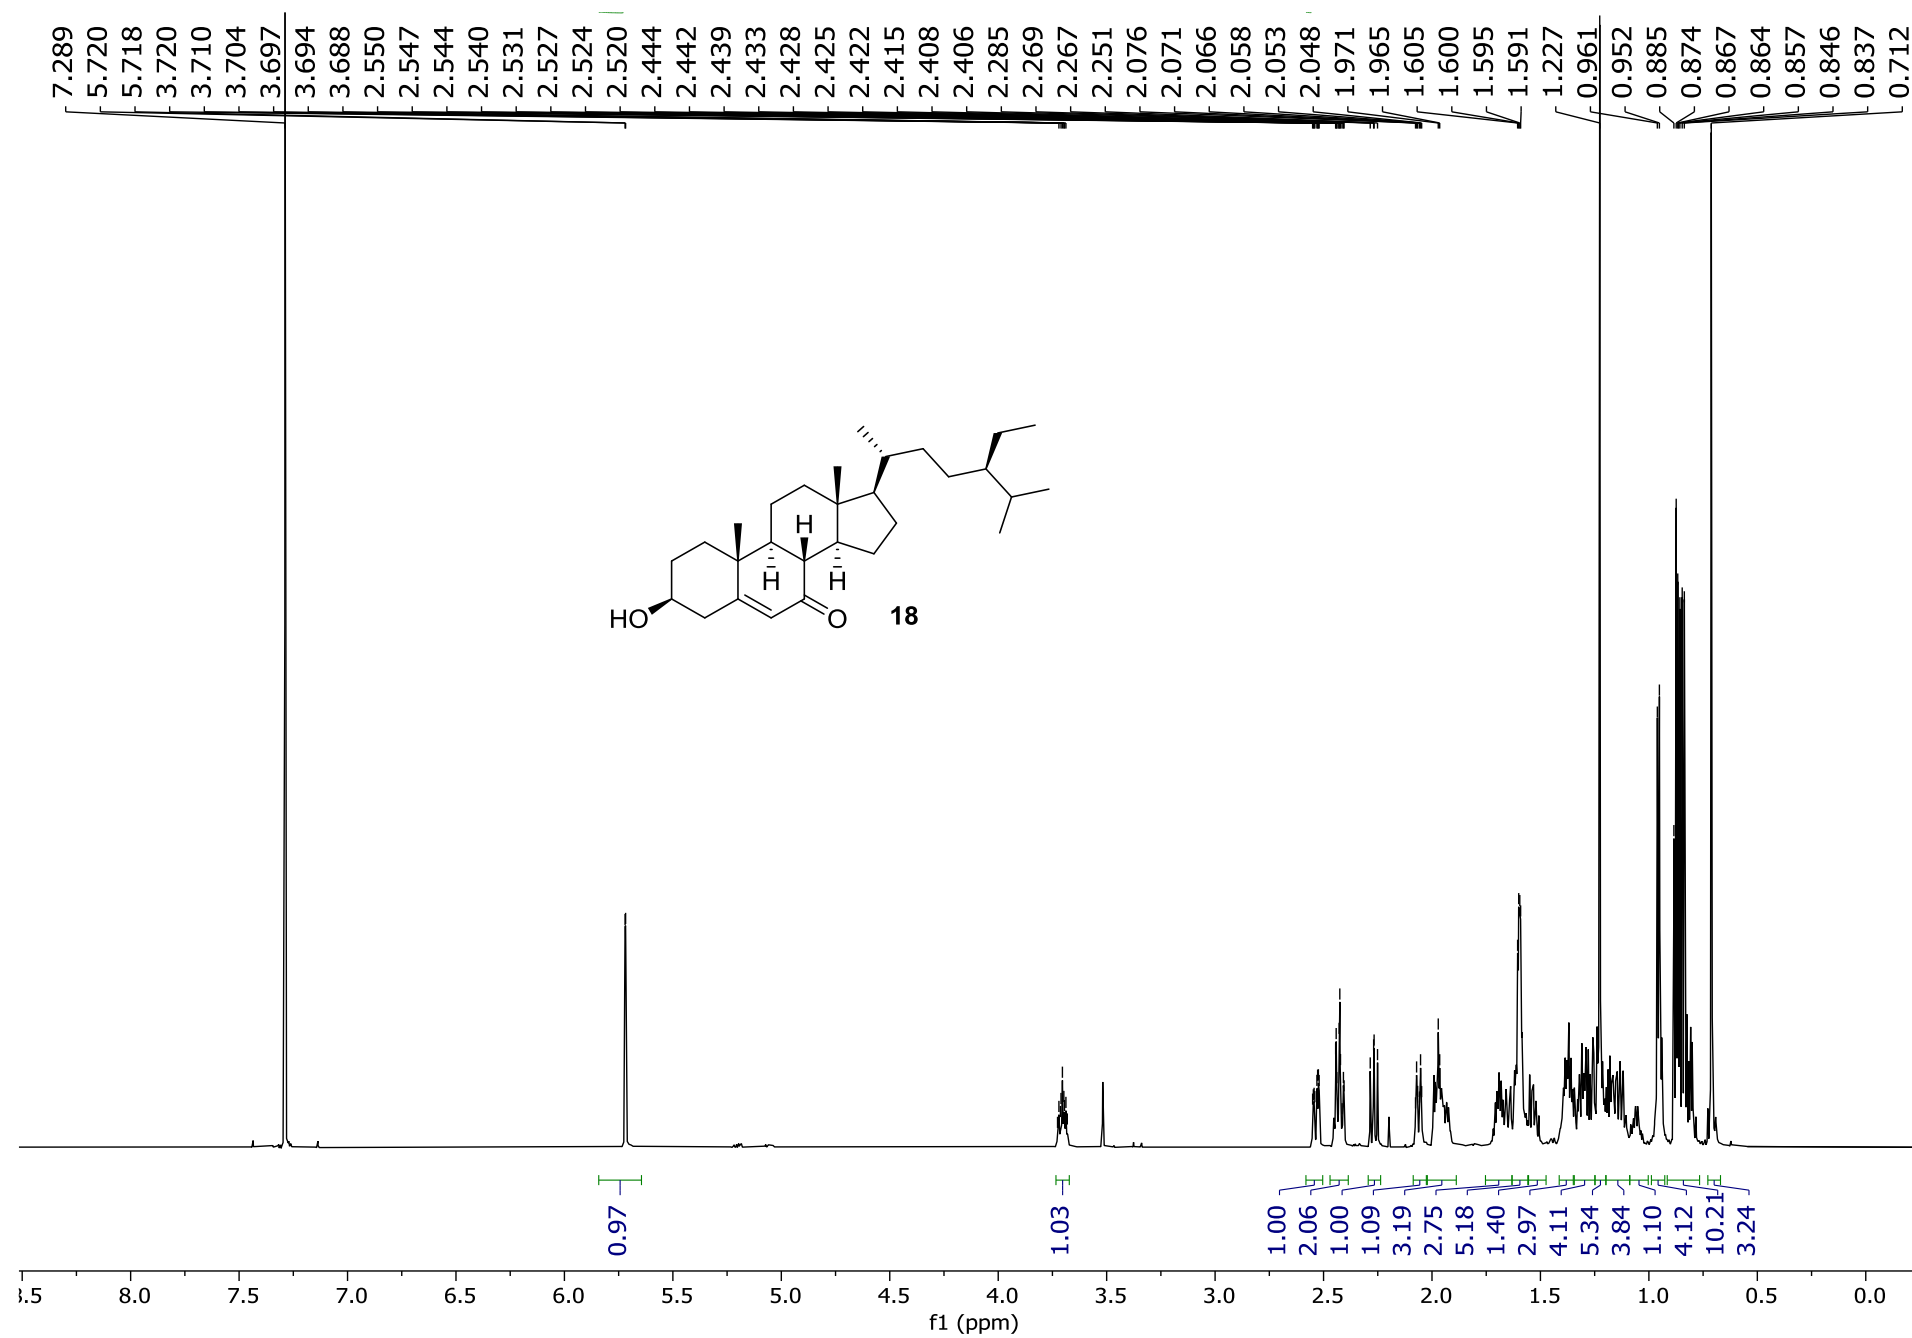

**Figure S35.**  $^{13}\text{C}$  NMR spectrum of **18** in chloroform-*d* (175 MHz)

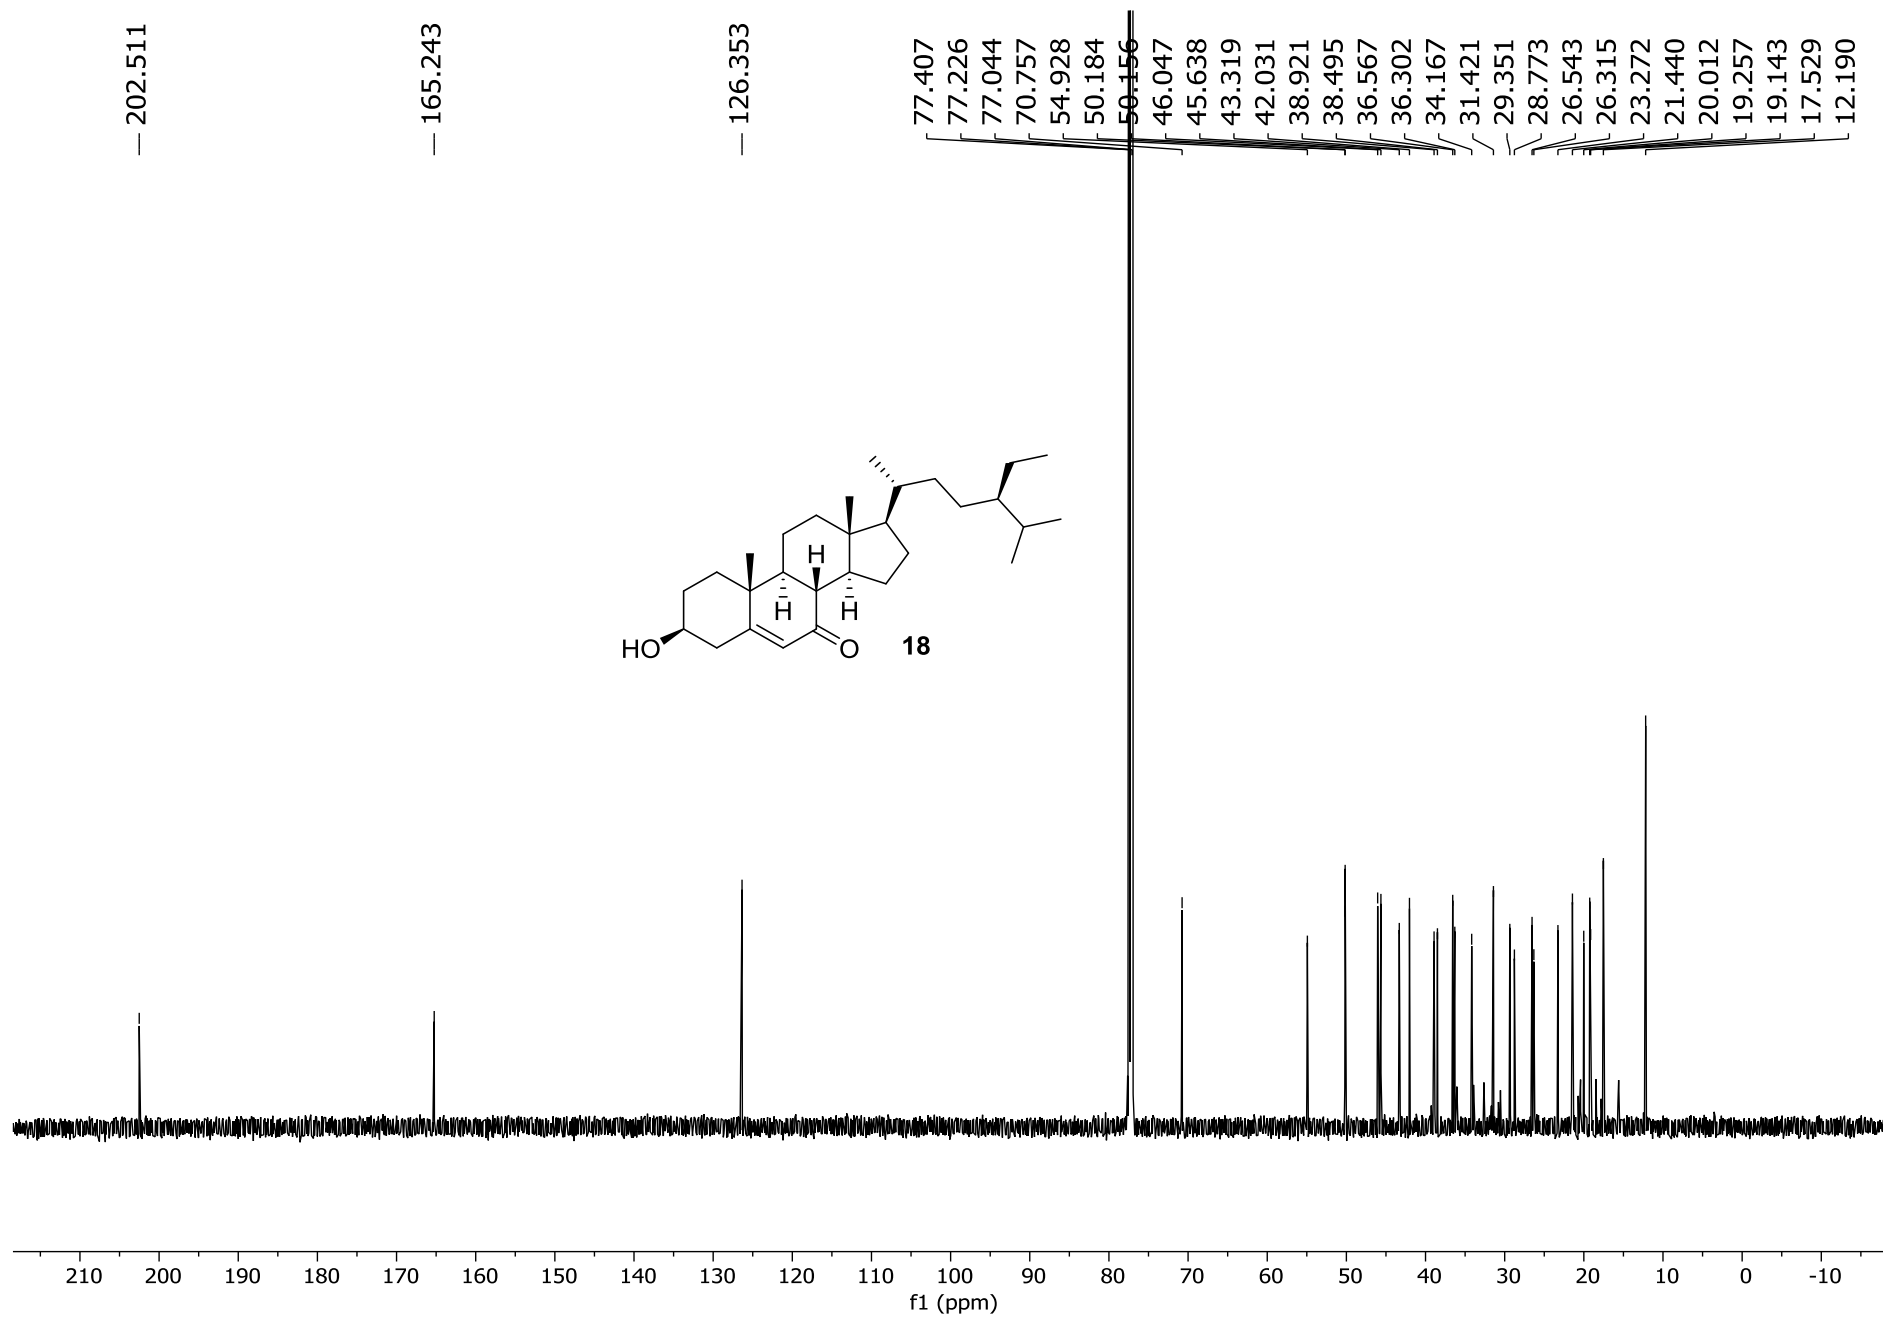

Supplement: s1 [file s1]
